# Supplementary material for: SlitC-PlexinA1 mediates iterative inhibition for orderly passage of spinal commissural axons through the floor plate
Source: eLife. 2020 Dec 21;9:e63205. doi: 10.7554/eLife.63205 (PMC7775108; doi:10.7554/eLife.63205)
Supplement: Figure 1—figure supplement 1—source data 1. [file elife-63205-fig1-figsupp1-data1.xlsx]

## Sheet: Figure S1C
Litter #	Parents genotype	# WT homozygous	# heterozygous	# mutant homozygous
1	+/-	1	5	3
2	+/-	2	4	1
3	+/-	2	3	2
4	+/-	3	1	2
5	+/-	0	2	1
6	+/-	0	4	2
7	+/-	0	2	2
8	+/-	1	2	1
	Percentages per litter						Paired t-test		WT v heterozygous	WT v mutant	Heterozygous v mutant
		11.1111	55.5556	33.3333				p-values	0.0254	0.1650	0.027
		28.5714	57.1429	14.2857
		28.5714	42.8571	28.5714
		50	16.6667	33.3333
		0	66.6667	33.3333
		0	66.6667	33.3333
		0	50	50
		25	50	25
