# Supplementary material for: SlitC-PlexinA1 mediates iterative inhibition for orderly passage of spinal commissural axons through the floor plate
Source: eLife. 2020 Dec 21;9:e63205. doi: 10.7554/eLife.63205 (PMC7775108; doi:10.7554/eLife.63205)
Supplement: Figure 1—figure supplement 1—source data 2. [file elife-63205-fig1-figsupp1-data2.xlsx]

## Sheet: Figure S1D
Litter #	Females	Males	% Females	% Males			Litter	Females	Males	All offspring
1	2	7	22.2222	77.7778		Total	41	98	122	220
2	3	4	42.8571	57.1429
3	2	5	28.5714	71.4286
4	1	5	16.6667	83.3333
5	5	2	71.4286	28.5714
6	6	4	60	40		Paired t-test		Female v male
7	2	4	33.3333	66.6667			p-value	0.4023
8	2	1	66.6667	33.3333
9	0	6	0	100
10	3	1	75	25
11	3	5	37.5	62.5
12	2	5	28.5714	71.4286
13	3	5	37.5	62.5
14	6	5	54.5455	45.4545
15	2	0	100	0
16	0	2	0	100
17	3	0	100	0
18	2	7	22.2222	77.7778
19	2	4	33.3333	66.6667
20	2	0	100	0
21	4	2	66.6667	33.3333
22	0	3	0	100
23	2	4	33.3333	66.6667
24	1	2	33.3333	66.6667
25	4	0	100	0
26	5	2	71.4286	28.5714
27	4	2	66.6667	33.3333
28	1	1	50	50
29	4	3	57.1429	42.8571
30	1	4	20	80
31	1	1	50	50
32	1	4	20	80
33	2	3	40	60
34	1	4	20	80
35	0	3	0	100
36	1	1	50	50
37	4	1	80	20
38	1	2	33.3333	66.6667
39	3	1	75	25
40	4	3	57.1429	42.8571
41	3	4	42.8571	57.1429
