# Supplementary material for: SlitC-PlexinA1 mediates iterative inhibition for orderly passage of spinal commissural axons through the floor plate
Source: eLife. 2020 Dec 21;9:e63205. doi: 10.7554/eLife.63205 (PMC7775108; doi:10.7554/eLife.63205)
Supplement: Figure 1—source data 1. [file elife-63205-fig1-data1.xlsx]

## Sheet: Figure 1B
PLXNA1 +/+	Genotype	Embryon #	# Cristal	counted cristal	normal	Stalling	Straight	Recrossing			mean +/+			counted cristal	normal	Stalling	Straight	Recrossing
	+/+	44	2	1	1	0	0	0			n=	3		mean	100	20.5026	58.9947	0
			3	1	1	0	0	0						SEM	0	3.21023	6.42046	0
			5	1	1	1	0	0
			6	1	1	0	0	0			mean +/Y1815F			counted cristal	normal	Stalling	Straight	Recrossing
	+/+	45	2	1	1	0	0	0			n=	5		mean	100	15.2808	64	18.4808
	+/+	50	1	1	1	0	1	0						SEM	0	1.81627	11.3616	5.53981
			3	1	1	0	1	0
			4	1	1	0	1	0			mean Y1815F/Y1815F			counted cristal	normal	Stalling	Straight	Recrossing
			5	1	1	1	0	0			n=	4		mean	100	16.9293	59.2612	22.8291
			6	1	1	1	1	0						SEM	0	2.87035	13.1423	4.92566
			7	1	1	0	1	0
			8	1	1	0	1	0
	n=	1		12	12	3	6	0
				%	100	25	50	0
	+/+	66	8	1	1	0	1	0
			9	1	1	0	1	0				nb of embryos		counted cristal	Normal	Stalling	Straight	Recrossing
			10	1	1	1	0	0			+/+	3		+/+	100	20.5026	58.9947	0
	+/+	67	2	1	1	0	1	0			+/Y1815F	5		+/Y1815F	100	15.2808	64	18.4808
			5	1	1	0	1	0			Y1815F/Y1815F	4		m/m	100	16.9293	59.2612	22.8291
			6	1	1	0	1	0			+/+			SEM	0	3.21023	6.42046	0
			7	1	1	0	0	0			+/Y1815F			SEM	0	14.4	11.3616	5.53981
	n=	1		7	7	1	5	0			Y1815F/Y1815F			SEM	0	11.7	13.1423	4.92566
				%	100	14.2857	71.4286	0
	+/+	78	1	1	1	0	0	0
			2	1	1	0	1	0
			3	1	1	0	1	0
			4	1	1	0	1	0
			5	1	1	0	1	0
			6	1	1	0	0	0
			7	1	1	0	0	0
			8	1	1	1	1	0
	+/+	32	1	1	1	1	0	0
	n=	1		9	9	2	5	0
				%	100	22.2222	55.5556	0
	moyenne +/+			counted crystal	normal	Stalling	Straight	Recrossing
nb of embryos	n=	3		mean	100	20.5026	58.9947	0
				SEM	0	0.57735	0.333333	0
PLXNA1 +/Y1815F	Genotype	Embryon #	# Cristal	counted crystal	normal	Stalling	Straight	Recrossing
	+/m	3	2	1	1	1	1	0
	+/m	17	3	1	1	0	1	1
			7	1	1	0	1	1			Statistics
	+/m	33	4	1	1	0	1	0
			5	1	1	0	0	0			Stalling	+/+	+/ Y1815F	Y1815F/ Y1815F		Straight	+/+	+/ Y1815F	Y1815F/ Y1815F
	n=	1		5	5	1	4	2				25	20	11.8			50	80	88.2353
				%	100	20	80	40				14.3	18.2	14.3			71.4286	100	57.1429
	m/+	41	1	1	1	0	1	0				22.2	16	25			55.5556	40	25
			2	1	1	1	1	0					11.1	16.7				55.5556	66.6667
			3	1	1	0	1	1					11.1					44.4444
			5	1	1	1	1	0			T-test welch correction					T-test welch correction
			7	1	1	0	1	1			Stalling	+/ Y1815F	Y1815F/ Y1815F	Y1815F/ Y1815F		Straight	+/ Y1815F	Y1815F/ Y1815F	Y1815F/ Y1815F
			8	1	1	0	1	0				vs,	vs,	vs,			vs,	vs,	vs,
	+/m	42	1	1	1	0	1	0				+/+	+/+	+/ Y1815F			+/+	+/+	+/ Y1815F
			2	1	1	0	1	0			p-value	0.243	0.4499	0.6424		p-value	0.7152	0.9871	0.793
			3	1	1	0	1	0
			5	1	1	0	1	0
			6	1	1	0	1	0
	n=	1		11	11	2	11	2			Recrossing	+/+	+/ Y1815F	Y1815F/ Y1815F
				%	100	18.1818	100	18.1818				0	40	29.4118
	+/m	46	1	1	1	1	0	0				0	18.1818	28.5714
			3	1	1	0	0	1				0	12	8.33333
			4	1	1	0	0	0					11.1111	25
			5	1	1	0	0	0					11.1111
	+/m	47	1	1	1	1	0	0			T-test welch correction
			2	1	1	0	1	0			Recrossing	+/ Y1815F	Y1815F/ Y1815F	Y1815F/ Y1815F
			3	1	1	0	0	0				vs,	vs,	vs,
			4	1	1	0	1	0				+/+	+/+	+/ Y1815F
	+/m	48	2	1	1	0	1	0			p-value	0.029	0.019	0.5766
			3	1	1	0	0	0
			4	1	1	0	1	0
			5	1	1	1	1	0
	+/m	49	1	1	1	0	0	0
			2	1	1	0	1	0
			3	1	1	1	0	1
			4	1	1	0	1	0
	m/+	55	1	1	1	0	0	0
			2	1	1	0	1	0
			3	1	1	0	1	0
			4	1	1	0	0	0
			5	1	1	0	0	0
	m/+	56	1	1	1	0	0	0
			2	1	1	0	0	0
			3	1	1	0	1	1
			4	1	1	0	0	0
	n=	1		25	25	4	10	3
				%	100	16	40	12
	m/+	60	1	1	1	1	1	0
			2	1	1	0	0	0
			3	1	1	0	0	0
			4	1	1	0	0	0
			6	1	1	0	1	1
			7	1	1	0	1	0
	m/+	65	1	1	1	0	1	0
			2	1	1	0	1	0
			3	1	1	0	0	0
	n=	1		9	9	1	5	1
				%	100	11.1111	55.5556	11.1111
	m/+	70	1	1	1	0	1	0
			2	1	1	0	0	0
			3	1	1	0	1	0
			4	1	1	0	1	0
			5	1	1	0	0	0
			6	1	1	1	0	0
			7	1	1	0	0	1
			9	1	1	0	0	0
			10	1	1	0	1	0
	n=	1		9	9	1	4	1
				%	100	11.1111	44.4444	11.1111
	moyenne +/m			counted crystal	normal	Stalling	Straight	Recrossing
nb of embryos	n=	5		mean	100	15.2808	64	18.4808
				SEM	0	1.81627	11.3616	5.53981
	Genotype	Embryon #	# Cristal	counted crystal	normal	Stalling	Straight	Recrossing
PLXNA1 Y1815F/Y1815F	m/m	38	1	1	1	0	0	0
	m/m	40	2	1	1	1	1	1
			3	1	1	0	1	1
			4	1	1	0	1	0
			5	1	1	0	1	0
			6	1	1	0	1	0
			7	1	1	0	1	1
			10	1	1	0	1	0
	m/m	43	1	1	1	0	1	1
			2	1	1	0	1	0
			3	1	1	0	1	1
			4	1	1	0	1	0
			5	1	1	0	1	0
			6	1	1	0	1	0
			7	1	1	0	0	0
			8	1	1	0	1	0
			9	1	1	1	1	0
	n=	1		17	17	2	15	5
				%	100	11.7647	88.2353	29.4118
	m/m	61	1	1	1	0	0	0
			2	1	1	1	0	0
			3	1	1	0	1	0
			4	1	1	0	1	0
			5	1	1	0	1	0
			6	1	1	0	1	1
	m/m	63	1	1	1	1	0	0
			2	1	1	0	0	0
			3	1	1	0	1	1
			4	1	1	0	1	0
			5	1	1	0	1	1
			6	1	1	0	1	0
			7	1	1	0	0	0
			7bis	1	1	0	0	1
	n=	1		14	14	2	8	4
				%	100	14.2857	57.1429	28.5714
	m/m	69	2	1	1	0	0	0
			3	1	1	0	0	0
			4	1	1	0	1	0
			6	1	1	0	1	0
	m/m	71	1	1	1	0	0	0
			2	1	1	0	0	0
			5	1	1	1	0	0
			6	1	1	0	0	0
			7	1	1	0	1	0
			8	1	1	1	0	0
			9	1	1	0	0	1
			10	1	1	1	0	0
	n=	1		12	12	3	3	1
				%	100	25	25	8.33333
	m/m	79	1	1	1	0	0	0
			4	1	1	0	1	0
	m/m	80	1	1	1	0	0	0
			2	1	1	0	0	0
			3	1	1	0	1	0
			4	1	1	0	1	1
			5	1	1	0	1	0
			6	1	1	1	1	0
			7	1	1	0	1	0
			8	1	1	0	0	1
			9	1	1	1	1	1
			10	1	1	0	1	0
	n=	1		12	12	2	8	3
				%	100	16.6667	66.6667	25
	mean m/m			counted crystal	normal	Stalling	Straight	Recrossing
nb of embryos	n=	4		mean	100	16.9293	59.2612	22.8291
				SEM	0	2.87035	13.1423	4.92566
