# Supplementary material for: SlitC-PlexinA1 mediates iterative inhibition for orderly passage of spinal commissural axons through the floor plate
Source: eLife. 2020 Dec 21;9:e63205. doi: 10.7554/eLife.63205 (PMC7775108; doi:10.7554/eLife.63205)
Supplement: Figure 2—source data 1. [file elife-63205-fig2-data1.xlsx]

## Sheet: Figure 2B
Genotype	Embryo	Image	early turn 60-90°	deviated 30-60°	normal 0-30°
PlxnA1 Y1815F	5	1	0	0	1
		2	1	1	2			#	normal 0-30°	deviated 30-60°	early turn 60-90°			Chi2
		3	0	2	4			PlxnA1	137	14	8	159		p-value	4.1006040359301E-10
		4	1	6	7			PlxnA1 Y1815F	100	36	49	185
		5	1	2	5
		6	2	1	3
		7	6	3	5			%	normal 0-30°	deviated 30-60°	early turn 60-90°
		8	5	1	7			PlxnA1	86.1635	8.80503	5.03145
		9	3	1	3			PlxnA1 Y1815F	54.0541	19.4595	26.4865
	7	1	5	1	4
		2	1	1	5
		3	0	1	2
		4	0	1	2
		5	2	0	2
		6	1	0	2
		7	2	1	2
		8	0	0	0
		9	0	0	0
		10	1	0	1
	22	1	1	1	1
		2	1	1	1
	23	1	0	0	3
		2	0	1	4
		3	1	1	2
		4	2	1	1
		5	1	0	0
		6	1	0	0
		7	1	0	1
		8	0	1	1
	25	1	0	2	4
		2	0	0	1
		3	0	0	0
		4	2	0	2
	39	1	0	0	0
		2	0	0	0
		3	2	0	7
		4	0	1	3
		5	0	0	1
		6	0	0	1
		7	0	1	0
		8	0	0	0
	48	1	0	0	1
		2	0	0	0
		3	2	2	2
		4	2	0	1
		5	0	0	0
		6	1	1	3
		7	1	0	2
		8	0	1	1
	Total		49	36	100	185	7 embryos
	%		26.4865	19.4595	54.0541
PlxnA1	210 E5	1	1	0	1
		2	0	1	2
		3	0	1	9
		4	0	0	3
		5	1	0	4
		6	0	0	2
		7	0	0	2
		8	0	2	3
		9	0	3	3
		10	0	0	6
		11	0	0	5
		12	0	1	6
		13	0	0	3
		14	0	0	0
		15	0	0	1
		16	0	0	3
	207 E6	1	0	0	1
		2	1	0	7
		3	0	0	2
		4	0	0	4
		5	0	0	2
		6	0	0	0
		7	0	0	0
		8	1	0	2
		9	1	0	4
		10	0	0	1
		11	0	0	0
		12	0	0	1
	28	0	0	0	0
		1	0	0	3
		2	0	1	2
	29	0	0	0	3
		1	0	0	5
		2	1	0	1
		3	1	0	2
	36	0	0	0	2
		1	1	0	1
		2	0	0	2
		3	0	0	2
		4	0	1	5
		5	0	0	2
		6	0	0	0
	37	0	0	0	0
		1	0	0	0
		2	0	0	0
		3	0	0	0
		4	0	0	6
		5	0	0	0
		6	0	0	1
	44	0	0	1	2
		1	0	0	1
		2	0	0	0
	45	0	0	0	1
		1	0	1	4
		2	0	1	2
		3	0	0	3
		4	0	0	1
		5	0	0	3
		6	0	0	0
		7	0	0	0
		8	0	0	3
		9	0	1	3
	Total		8	14	137	159	8 embryos
	%		5.03145	8.80503	86.1635
