# Supplementary material for: SlitC-PlexinA1 mediates iterative inhibition for orderly passage of spinal commissural axons through the floor plate
Source: eLife. 2020 Dec 21;9:e63205. doi: 10.7554/eLife.63205 (PMC7775108; doi:10.7554/eLife.63205)
Supplement: Figure 2—source data 2. [file elife-63205-fig2-data2.xlsx]

## Sheet: Figure 2C
Genotype	Embryo	Image	0	1	2	>2
PlxnA1 Y1815F	5	1	0	0	1	0
		4	3	2	2	0				#	0	1	2	>2
		5	3	0	1	1				PlxnA1	47	12	5	0	64
		6	2	1	1	0				PlxnA1 Y1815F	47	36	30	19	132
		7	0	3	1	2										Chi2
		8	2	3	0	0				%	0	1	2	>2		p-value	2.5611283869933E-6
		9	2	1	0	1				PlxnA1	73.4375	18.75	7.8125	0
	7	1	2	0	1	3				PlxnA1 Y1815F	35.6061	27.2727	22.7273	14.3939
		4	4	6	2	1
		5	4	2	4	1
		6	4	4	1	0
		8	4	2	0	0
	22	1	1	2	0	0
		2	1	0	1	0
	23	1	3	4	9	9
		2	2	0	1	1
		3	0	0	1	0
		4	0	0	1	0
	39	3	3	1	0	0
		4	1	1	0	0
		6	1	0	0	0
		7	0	0	1	0
	41	4	0	0	1	0
		5	0	1	1	0
		6	2	0	0	0
		7	2	0	0	0
		8	0	1	0	0
	48	7	1	1	0	0
		8	0	1	0	0
	Total		47	36	30	19	132	7 embryos
	%		35.6061	27.2727	22.7273	14.3939	100
PlxnA1	28	0	0	1	0	0
	29	3	1	0	0	0
	36	0	1	0	0	0
	44	1	1	0	0	0
	45	9	1	1	0	0
	207 E6	1	1	0	0	0
		2	2	1	0	0
		6	2	1	0	0
		12	1	0	0	0
	210 E5	2	3	0	1	0
		3	9	0	0	0
		4	1	0	0	0
		5	1	1	1	0
		6	5	0	0	0
		7	2	0	0	0
		8	0	1	1	0
		9	0	0	1	0
		10	1	0	1	0
		11	1	0	0	0
		12	3	2	0	0
	210 E7	1	0	1	0	0
		2	1	1	0	0
		8	1	1	0	0
	210 E9	6	1	1	0	0
		8	2	0	0	0
	210 E10	2	6	0	0	0
	Total		47	12	5	0	64	10 embryos
	%		73.4375	18.75	7.8125	0	100
