# Supplementary material for: SlitC-PlexinA1 mediates iterative inhibition for orderly passage of spinal commissural axons through the floor plate
Source: eLife. 2020 Dec 21;9:e63205. doi: 10.7554/eLife.63205 (PMC7775108; doi:10.7554/eLife.63205)
Supplement: Figure 2—source data 3. [file elife-63205-fig2-data3.xlsx]

## Sheet: Figure 2F
Plasmid	Embryo	Image	Straight	Tortuous	Stalling	Early turns	rostral	caudal
PlxnA1	1	1	12	3	1	2	2
		2	14	3	1	2	2
		3	7	1	2	3	3
		4	3	1	2	0							#	Straight	Tortuous	Stalling	Early turns			Chi2
		5	10	5	1	1	1						PlxnA1	133	35	20	23	211		p-value	1.7997442343843E-9
	2	1	4	1	1	3	2	1					PlxnA1 Y1815F	101	105	30	57	293
		2	6	2	1	3	3
		3	15	4	1	3	2	1
		4	17	5	3	3	2	1
		5	14	4	5	1	1						%	Straight	Tortuous	Stalling	Early turns
	3	1	6	2	1	0							PlxnA1	63.0332	16.5877	9.47867	10.9005	100
		2	7	1	0	2	1	1					PlxnA1 Y1815F	34.471	35.8362	10.2389	19.4539	100
		3	7	2	1	0
		4	3	1	0	0
		5	8	0	0	0
	TOTAL		133	35	20	23	19	4	211	3 embryos
	%		63.0332	16.5877	9.47867	10.9005			100
PlxnA1 Y1815F	3	1	5	7	2	4	4
		2	4	4	2	3	3
		3	8	8	1	3	1	2
		4	12	6	4	2		2
	5	1	5	10	3	11	5	6
		2	13	13	3	7	1	6
		3	8	10	3	6	4	2
		4	4	7	2	8	4	4
	6	1	6	3	2	1		1
		2	12	8	3	2	1	1
		3	12	12	2	4	3	1
		4	7	6	2	4	4
		5	5	11	1	2	1	1
	TOTAL		101	105	30	57	31	26	293	3 embryos
	%		34.471	35.8362	10.2389	19.4539			100
