# Supplementary material for: SlitC-PlexinA1 mediates iterative inhibition for orderly passage of spinal commissural axons through the floor plate
Source: eLife. 2020 Dec 21;9:e63205. doi: 10.7554/eLife.63205 (PMC7775108; doi:10.7554/eLife.63205)
Supplement: Figure 2—source data 4. [file elife-63205-fig2-data4.xlsx]

## Sheet: Figure 2J
Plasmid	Embryo	Image	0	1	2	>2
PlxnA1	1	1	14	3	0	0
		2	12	0	0	0
		3	9	2	0	0
		4	4	2	0	0
		5	13	3	0	0
	2	1	8	1	0	0
		2	10	2	0	0				#	0	1	2	>2			Chi2
		3	16	0	1	0				PlxnA1	139	26	1	0	166		p-value	3.3238468228188E-11
		4	13	4	0	0				PlxnM Tyr	199	126	39	14	378
		5	13	4	0	0
	3	1	6	3	0	0				%	0	1	2	>2
		2	13	2	0	0				PlxnA1	83.7349	15.6627	0.60241	0
		4	3	0	0	0				PlxnM Tyr	52.6455	33.3333	10.3175	3.7037
		5	5	0	0	0
	TOTAL		139	26	1	0	166
	%		83.7349	15.6627	0.60241	0	100
PlxnA1 Y1815F	3	1	19	9	1	0
		2	17	9	3	0
		3	25	9	0	1
		4	15	6	0	0
	5	1	5	9	3	1
		2	22	13	5	1
		3	21	15	5	2
		4	8	8	4	0
		5	5	5	2	7
	6	1	7	6	3	0
		2	18	10	2	1
		3	9	9	5	0
		4	13	9	4	1
		5	3	3	1	0
	8	5	12	6	1	0
	TOTAL		199	126	39	14	378
	%		52.6455	33.3333	10.3175	3.7037	100
