# Supplementary material for: SlitC-PlexinA1 mediates iterative inhibition for orderly passage of spinal commissural axons through the floor plate
Source: eLife. 2020 Dec 21;9:e63205. doi: 10.7554/eLife.63205 (PMC7775108; doi:10.7554/eLife.63205)
Supplement: Figure 3—figure supplement 1—source data 1. [file elife-63205-fig3-figsupp1-data1.xlsx]

## Sheet: Figure S3B
			Mean intensity						Corrected mean intensity					Normalized corrected mean intensity
EP	# embryo	# position	GC	axon shaft 1	axon shaft 2	axon shaft 3	BG		GC	axon shaft 1	axon shaft 2	axon shaft 3		GC	axon shaft 1	axon shaft 2	axon shaft 3
pHluo-PlxnA1 + PlxnA1	1	1	33675.7	26125.7	22825.5	21179.1	15060.7		18615	11065	7764.76	6118.36		100	59.4415	41.7124	32.8679
			32971.9	29447.3	24005.2	21499	15060.7		17911.2	14386.6	8944.48	6438.29		100	80.322	49.938	35.9457			GC	axon shaft 1	axon shaft 2	axon shaft 3
		2	51767.9	41972.5	40191.5	35047.5	24593.4		27174.5	17379.1	15598	10454.1		100	63.9537	57.3996	38.4703		pHluo-PlxnA1 + PlxnA1	100	63.2778	49.0054	40.09
	2	5	42366.8	30370.6	28058.9	24934.7	19070.8		23295.9	11299.8	8988.1	5863.91		100	48.5053	38.5823	25.1714		pHluoPlxnA1 + PlxnA1 Y1815F	100	52.9506	43.9109	32.6174
			31170.9	27846.8	25801.7	23862.8	19070.8		12100	8775.94	6730.86	4791.95		100	72.5283	55.6268	39.6028		SEM	0	3.98788	2.87497	2.70693
	3	1	52190	34372.9	29682.6	26193.1	15796.8		36393.3	18576.1	13885.8	10396.3		100	51.0426	38.155	28.5665			0	2.18601	2.93681	2.20829
		2	51659.9	45127.7	38519.8	34992.7	16631.3		35028.6	28496.3	21888.5	18361.4		100	81.3517	62.4875	52.4183		p-value		0.0338931	0.224024	0.0411967	Welch Two Sample t-test
		3	27398.5	24940.5	21868.3	19864.8	12005.9		15392.5	12934.5	9862.33	7858.86		100	84.0312	64.0722	51.0563				*	n.s.	*
	4	2	33436	28157.3	26248.1	25291.4	11535.8		21900.2	16621.5	14712.3	13755.6		100	75.8967	67.1789	62.8105
		4	47536.5	38173	30010.5	28189.8	14242.6		33293.9	23930.4	15767.9	13947.2		100	71.8762	47.3598	41.8911
		9	50849.8	35077.4	31591.6	30241.8	13711.2		37138.6	21366.2	17880.4	16530.6		100	57.531	48.145	44.5105
			55064.5	31026.6	27677	28306.8	13711.2		41353.3	17315.4	13965.7	14595.6		100	41.8718	33.7718	35.295
		11	43952	25300.2	26377.1	26202.6	13873.9		30078.1	11426.4	12503.2	12328.7		100	37.9889	41.5692	40.9889
			39099.4	28895.4	23983.5	21861.4	13873.9		25225.5	15021.5	10109.6	7987.5		100	59.5489	40.0768	31.6643
									26778.6	16328.2	12757.3	10673.5		100	63.2778	49.0054	40.09
pHluoPlxnA1 + PlxnA1 Y1815F	1	2	38224.1	29326.3	25085.7	22379.6	14507.5		23716.6	14818.8	10578.2	7872.14		100	62.483	44.6027	33.1925
			34263.3	28721.3	27440.8	23156.3	14507.5		19755.9	14213.9	12933.3	8648.8		100	71.9476	65.4655	43.7784
		4	39897.5	30709.5	26331.3	24834.3	18426.7		21470.8	12282.8	7904.58	6407.59		100	57.2071	36.8154	29.8432
		5	26510.6	21308.4	20331.4	17141.4	12919.1		13591.5	8389.31	7412.35	4222.31		100	61.7247	54.5366	31.0658
	2	1	38368.1	27251.5	20454.8	18306.3	14846.7		23521.3	12404.7	5608.01	3459.56		100	52.7382	23.8423	14.7082
		3	49610.9	30276.8	24725.4	23810.2	18325.7		31285.3	11951.1	6399.77	5484.51		100	38.2005	20.4562	17.5307
	3	0	12323.3	10221.3	9983.57	9501.35	7737.03		4586.26	2484.31	2246.54	1764.32		100	54.1684	48.9841	38.4697
		2	18273.7	13173.7	10908.6	10467.3	8557.35		9716.39	4616.33	2351.24	1909.99		100	47.5107	24.1987	19.6574
		4	17827.4	11999	11694.9	11948.7	8274.55		9552.8	3724.47	3420.34	3674.1		100	38.9883	35.8045	38.461
			14635.6	11281.7	12398.8	10432.3	8274.55		6361.05	3007.15	4124.27	2157.74		100	47.2744	64.8363	33.9212
		5	23682.9	17092.8	17086.4	15487.1	10190.6		13492.3	6902.15	6895.83	5296.51		100	51.1563	51.1094	39.2558
		6	23546.6	17712.9	18695.4	15951.8	10592.9		12953.7	7120.04	8102.52	5358.87		100	54.9655	62.5501	41.3695
			29281.9	21050.6	18738.1	16830.5	10592.9		18689	10457.7	8145.2	6237.56		100	55.9564	43.5829	33.3756
			20742.1	15831.3	15011	13902.4	10592.9		10149.2	5238.41	4418.05	3309.52		100	51.6139	43.5309	32.6086
		8	20771.2	15423.7	15118	13908.5	8728.91		12042.3	6694.74	6389.13	5179.61		100	55.5934	53.0556	43.0117
		10	20154.5	15546.7	15531.1	15524.5	9666.45		10488	5880.27	5864.69	5858.08		100	56.0664	55.9178	55.8548
			24691.2	15779	14212.8	12429.9	9666.45		15024.7	6112.53	4546.38	2763.45		100	40.6832	30.2593	18.3927
		11	11444.2	9254.81	8767.55	8030.47	7029.14		4415.1	2225.67	1738.41	1001.34		100	50.4105	39.3742	22.6798
			12100.2	9414.47	8812.01	8510.69	7029.14		5071.07	2385.33	1782.87	1481.55		100	47.0381	35.1577	29.2157
			10683.5	9983.93	9295.82	8495.55	7029.14		3654.34	2954.79	2266.69	1466.41		100	80.8571	62.0273	40.128
	4	0	48314.1	34673.4	33064.5	32697.1	22226.7		26087.4	12446.7	10837.8	10470.4		100	47.7115	41.5441	40.1358
		3	40267.7	25826.2	22852.3	21037.5	15948.4		24319.3	9877.89	6903.98	5089.14		100	40.6174	28.3888	20.9263
									14542.9	7554.05	5948.64	4505.16		100	52.9506	43.9109	32.6174
