# Supplementary material for: SlitC-PlexinA1 mediates iterative inhibition for orderly passage of spinal commissural axons through the floor plate
Source: eLife. 2020 Dec 21;9:e63205. doi: 10.7554/eLife.63205 (PMC7775108; doi:10.7554/eLife.63205)
Supplement: Figure 3—figure supplement 1—source data 2. [file elife-63205-fig3-figsupp1-data2.xlsx]

## Sheet: Figure S3C
			Mean intensity				Mean intensity			Normalized intensity
EP	# embryo	# position	GC	axon shaft 1	background		GC	axon shaft 1		GC	axon shaft 1
pHluo-PlxnA1 + PlxnA1	7	0	32729.3	22719.9	9305.07		23424.2	13414.9		104.167	104.81
			21102	14289.6	9305.07		11796.9	4984.57		52.4605	38.9441
			17877.3	12855.5	9305.07		8572.26	3550.47		38.1206	27.7396
		1	20670.9	16830.2	8972.41		11698.4	7857.78		52.0226	61.3923
		4	12258.6	12204.3	8741.81		3516.82	3462.53		15.6392	27.0525
		5	17781.4	15187.9	8483.01		9298.36	6704.91		41.3495	52.385
			19471.6	14384.6	8483.01		10988.6	5901.63		48.8659	46.109						GC	Axon shaft 1
		6	22079.4	17219.6	11075.5		11003.8	6144.02		48.9337	48.0028					pHluo-PlxnA1 + PlxnA1	22487.2	12799.3
			25570.4	15630.7	11075.5		14494.8	4555.12		64.4581	35.5888					pHluoPlxnA1 + PlxnA1 Y1815F	17547.4	10289.3
			22036.2	18546.6	11075.5		10960.6	7471.1		48.7416	58.3712
			23891	18370.4	11075.5		12815.4	7294.9		56.9899	56.9945
		7	32545.8	22863.4	9219.25		23326.6	13644.2		103.733	106.601						GC	Axon shaft 1
			30678	23166.8	9219.25		21458.7	13947.5		95.4262	108.971					pHluo-PlxnA1 + PlxnA1	100	100
			28519.4	15546.6	9219.25		19300.2	6327.39		85.8274	49.4354					pHluoPlxnA1 + PlxnA1 Y1815F	78.0326	80.3896
			24878.5	12991.9	9219.25		15659.2	3772.64		69.6361	29.4754
		9	26319.3	13719.2	7553.79		18765.5	6165.43		83.4495	48.17
		10	26013.5	19072.2	9498.88		16514.6	9573.3		73.4401	74.7955						GC	Axon shaft 1
		12	15710.9	11818	9048.99		6661.9	2769.03		29.6253	21.6343					pHluo-PlxnA1 + PlxnA1	100	100
	8	0	24155.5	19232.1	10072.3		14083.2	9159.79		62.6276	71.5648					pHluoPlxnA1 + PlxnA1 Y1815F	78.0326	80.3896
			20276.3	18862.6	10072.3		10204	8790.23		45.3768	68.6774					SEM	7.17566	7.85852
		2	28707	22603	9730.8		18976.2	12872.2		84.3867	100.57						9.68189	9.58903
		4	33149.2	25259.6	10673.9		22475.3	14585.6		99.9469	113.957					p-value	0.0734959	0.118781	Welch Two Sample t-test
			35663.1	20510.4	10673.9		24989.1	9836.43		111.126	76.8513						n.s.	n.s.
		6	43062.8	29792.3	13820.1		29242.6	15972.2		130.041	124.79
			37249.7	26675.9	13820.1		23429.6	12855.8		104.191	100.441
		7	37547.4	28064.2	14325.6		23221.8	13738.6		103.267	107.339
	4	0	56470.9	38610.8	18713.1		37757.8	19897.8		167.908	155.46
			45849.2	42142.6	18713.1		27136.1	23429.6		120.673	183.054
		1	35688.1	31620.7	13566.7		22121.5	18054		98.3735	141.055
			36355.5	33762.4	13566.7		22788.8	20195.8		101.341	157.788
		2	33349.2	27688.7	11535.2		21814	16153.5		97.0064	126.206
			35138.5	26994.1	11535.2		23603.3	15459		104.963	120.78
			33419.1	25540.6	11535.2		21883.9	14005.4		97.3171	109.424
		4	51189.1	39576.5	14232.8		36956.3	25343.7		164.344	198.009
			44604.5	36841.9	14232.8		30371.7	22609.1		135.062	176.643
		5	65098	46949.1	15055.7		50042.2	31893.3		222.536	249.18
		8	40930.6	24696.9	12809.5		28121.1	11887.4		125.053	92.875
			51409.8	30668.4	12809.5		38600.3	17858.9		171.654	139.53
		9	55585.8	32425.6	13893.8		41692	18531.9		185.403	144.788
			51861.3	30717.4	13893.8		37967.6	16823.7		168.841	131.442
			50691.1	33628.7	13893.8		36797.4	19734.9		163.637	154.188
		11	53517.2	34242.1	13984.9		39532.3	20257.2		175.799	158.268
			37790.8	28299.3	13984.9		23805.9	14314.4		105.864	111.838
			45551.4	25352	13984.9		31566.5	11367.1		140.375	88.8106
pHluoPlxnA1 + PlxnA1 Y1815F	7	1	18927.4	15406.6	9282.19		9645.17	6124.45		42.8918	47.8499
			19366.2	16423.4	9282.19		10084	7141.16		44.8434	55.7934
		2	18831	13645.1	9690.92		9140.05	3954.22		40.6455	30.8941
			16000.8	13579.5	9690.92		6309.87	3888.57		28.0598	30.3811
		10	16273.8	12862.7	9134.33		7139.5	3728.38		31.7491	29.1296
	8	0	45411.5	30805.3	11841.2		33570.3	18964.2		149.286	148.166
			35678.5	26318.2	11841.2		23837.3	14477		106.004	113.108
		1	24455.8	20290.4	8921.8		15534	11368.6		69.0791	88.822
		2	41789.8	33583.5	12666.8		29123.1	20916.8		129.51	163.421
		3	36472	29592.1	12722.5		23749.5	16869.6		105.613	131.801
		4	40098.1	29604	11197.1		28901	18406.9		128.522	143.812
			33582.4	24715.6	11197.1		22385.4	13518.5		99.547	105.619
		8	24659.9	20520.6	10976.6		13683.2	9543.93		60.8489	74.566
		9	17490.7	15660.8	9103.11		8387.59	6557.66		37.2994	51.2345
			17412.6	16323.9	9103.11		8309.5	7220.77		36.9521	56.4154
		11	22251.1	16809.2	9823.15		12428	6986.02		55.2668	54.5812
		12	23624.7	18508.9	11243.6		12381	7265.27		55.0582	56.763
		13	17985.2	14815.8	10174.6		7810.61	4641.18		34.7335	36.2612
		14	12909.4	11188.7	9803.64		3105.71	1385.1		13.811	10.8217
			14272.8	11378.2	9803.64		4469.2	1574.59		19.8744	12.3021
			13327.7	11846.8	9803.64		3524.03	2043.17		15.6713	15.9632
			13973.6	11994.1	9803.64		4170	2190.46		18.5439	17.1139
			14631	13626.1	9803.64		4827.41	3822.49		21.4673	29.8648
	4	0	64985.6	45318.5	22267.5		42718	23051		189.966	180.096
			50321.5	34936.6	22267.5		28054	12669		124.755	98.9823
		1	55249.1	37438.7	21171.5		34077.6	16267.3		151.542	127.095
			56910.5	40630.8	21171.5		35739	19459.3		158.93	152.034
		3	41426.3	25592.4	15889.5		25536.8	9702.91		113.561	75.8081
		4	39045.8	32352.8	19021.6		20024.2	13331.2		89.0469	104.156
		5	57967.8	41821.1	20211.7		37756.1	21609.3		167.9	168.832
