# Supplementary material for: SlitC-PlexinA1 mediates iterative inhibition for orderly passage of spinal commissural axons through the floor plate
Source: eLife. 2020 Dec 21;9:e63205. doi: 10.7554/eLife.63205 (PMC7775108; doi:10.7554/eLife.63205)
Supplement: Figure 3—source data 1. [file elife-63205-fig3-data1.xlsx]

## Sheet: Figure 3B
				Mean intensity						Corrected mean intensity					Normalized corrected mean intensity
Genotype	EP	# embryo	#GC	GC	axon shaft 1	axon shaft 2	axon shaft 3	BG		GC	axon shaft 1	axon shaft 2	axon shaft 3		GC	axon shaft 1	axon shaft 2	axon shaft 3			GC	axon shaft 1	axon shaft 2	axon shaft 3
-/-	pHluo-PlexA1 Y1815F	5	4.1	101076	101177	98090.6	92085.9	73889.6		27186.6	27287.4	24201	18196.2		100	100.371	89.0181	66.931		pHluo-PlexA1 Y1815F	100	74.645	68.8895	68.7183
			4.2	94606.4	82061.3	84897.1	81828.1	73889.6		20716.8	8171.65	11007.4	7938.47		100	39.4446	53.133	38.319		pHluo-PlexA1	100	49.1828	46.4446	48.3619
			4.3	88055.2	85954.2	80411.8	79814.9	73889.6		14165.6	12064.6	6522.18	5925.25		100	85.1685	46.0425	41.8285		SEM	0	5.57068	6.73882	8.06689
			5.1	85904.9	77801.5	80250.3	74112.7	64199.3		21705.6	13602.2	16051	9913.36		100	62.6666	73.9484	45.6719			0	3.6693	4.37969	4.94581
			5.2	74662	71383.3	70541.9	72144.8	64199.3		10462.7	7184.01	6342.55	7945.49		100	68.663	60.6206	75.9411		p-value		0.000613055	0.00895882	0.0398742	Welch Two Sample t-test
			5.3	75771	74657.2	75489.3	74924.1	64199.3		11571.7	10457.9	11290	10724.8		100	90.3744	97.565	92.6813				***	**	*
			6.1	74547.9	64055	60235.8	58031.6	49805.1		24742.7	14249.8	10430.6	8226.48		100	57.592	42.1564	33.2481
			6.2	60862.6	57737.8	54788.8	57110.4	49805.1		11057.5	7932.67	4983.65	7305.26		100	71.7403	45.0704	66.0663
			7	74338.2	80315.8	71444.7	87578.8	53959.7		20378.5	26356.1	17485	33619.1		100	129.333	85.8012	164.973
			8	86442	85118.7	82449.4	78571.7	67990.3		18451.6	17128.4	14459.1	10581.4		100	92.8286	78.3623	57.3466
		7	4	112808	88615	89359.1	88601.9	47942.4		64865.2	40672.6	41416.7	40659.5		100	62.7032	63.8504	62.683
			5.1	97261.2	66620	72106.3	88473.2	50948.9		46312.4	15671.1	21157.4	37524.4		100	33.8379	45.6841	81.0245
			5.2	73521.2	63853.6	62487.8	68072.7	50948.9		22572.4	12904.8	11538.9	17123.9		100	57.1707	51.1197	75.8621
			5.3	75677.2	74031.9	67915.9	73210.6	50948.9		24728.4	23083.1	16967	22261.7		100	93.3466	68.6137	90.025
			9	47023.1	41730.9	39091.6	39512.4	25356.8		21666.3	16374.1	13734.8	14155.6		100	75.574	63.3926	65.3345
		22	2	47808.7	46774.6	49749.3	46085.2	43870		3938.68	2904.63	5879.29	2215.17		100	73.7463	149.271	56.2414
		23	1	74194.4	73786.4	74193.6	75826.9	62286.3		11908.1	11500.1	11907.3	13540.6		100	96.5742	99.9933	113.709
			4	66402.5	60280.9	56918.2	54686.5	53521.8		12880.8	6759.16	3396.43	1164.71		100	52.4748	26.3682	9.04224
	pHluo-PlexA1	29	0	58389	44929.5	41961.1	41790.5	20855.9		37533.1	24073.6	21105.2	20934.6		100	64.1398	56.231	55.7764
		AP207 E6	2.1	69452.7	63833	63793	62929.7	49061.8		20391	14771.2	14731.3	13868		100	72.4401	72.244	68.0103
			2.2	75909.2	65752.7	64188.7	64710.9	49061.8		26847.4	16691	15127	15649.2		100	62.1696	56.3441	58.2892
			2.3	85918.1	67557.9	65858.4	63248.6	49061.8		36856.3	18496.2	16796.7	14186.9		100	50.1846	45.5734	38.4924
			6	52115.1	46109.2	47017.3	47674.4	41070.3		11044.9	5038.89	5947.03	6604.1		100	45.622	53.8443	59.7934
			12	64707.5	55547.8	54471	56057.2	46089.3		18618.2	9458.45	8381.66	9967.85		100	50.8023	45.0188	53.5383
		AP210 E5	2.1	32583.3	28748.1	28907.7	28017.4	25691.4		6891.95	3056.66	3216.27	2325.98		100	44.3511	46.6671	33.7493
			2.2	28755.2	26814.5	25811.1	25661.8	25691.4		3063.82	1123.11	119.695	-29.579		100	36.6571	3.90673	-0.965429
			2.3	28373.6	27023.1	27053	28206.2	25691.4		2682.17	1331.72	1361.61	2514.78		100	49.6509	50.7652	93.7594
			3.1	54126	36169.3	35525.3	35956.1	28320.5		25805.5	7848.75	7204.75	7635.54		100	30.415	27.9194	29.5888
			3.2	34439.9	32186.6	31990.4	32859.6	28320.5		6119.34	3866.06	3669.85	4539.04		100	63.1776	59.9713	74.1753
			4	33350.8	29803.9	28616.8	29471.6	26460.7		6890.07	3343.21	2156.07	3010.89		100	48.5221	31.2924	43.6989
			5	51695.5	41541.8	38853.4	38597.1	32956.8		18738.7	8585.02	5896.63	5640.27		100	45.8144	31.4677	30.0996
			6.1	29654.3	26731.2	27104.4	27380.7	24613.6		5040.72	2117.59	2490.83	2767.07		100	42.0096	49.4141	54.8942
			6.2	30982.5	27825.8	28848.6	29402.4	24613.6		6368.9	3212.21	4235.04	4788.77		100	50.4359	66.4957	75.19
			8.1	42062.3	38313.8	37688.9	37478	29530.3		12532.1	8783.56	8158.62	7947.71		100	70.0888	65.1021	63.4191
			8.2	39637.8	37668.4	38624.6	37479.7	29530.3		10107.6	8138.19	9094.31	7949.46		100	80.5157	89.9751	78.6485
			10	42817	39652.9	39644.4	39401.2	33991.7		8825.26	5661.18	5652.65	5409.53		100	64.1475	64.0508	61.296
			12	42621.2	38685.2	36396.8	38582.1	31792.3		10828.9	6892.89	4604.46	6789.76		100	63.6526	42.52	62.7002
		AP210 E7	1	40025	33612.5	32729.7	32000	27022.6		13002.4	6589.87	5707.11	4977.4		100	50.6819	43.8927	38.2805
			2	37562.3	31792.1	31529.3	31642.3	32043.4		5518.85	-251.284	-514.16	-401.146		100	-4.55319	-9.31643	-7.26865
		AP210 E9	8.1	40583.4	33167.8	35470.9	32419.8	28378.4		12205	4789.4	7092.52	4041.47		100	39.2413	58.1116	33.1132
			8.2	42421.3	31515.4	31443.5	30958.2	28378.4		14042.9	3137.06	3065.09	2579.84		100	22.339	21.8265	18.371
		AP210 E10	2	34876.4	31024.8	31240.1	31406.4	28676		6200.39	2348.81	2564.1	2730.38		100	37.8816	41.3539	44.0357
