# Supplementary material for: SlitC-PlexinA1 mediates iterative inhibition for orderly passage of spinal commissural axons through the floor plate
Source: eLife. 2020 Dec 21;9:e63205. doi: 10.7554/eLife.63205 (PMC7775108; doi:10.7554/eLife.63205)
Supplement: Figure 3—source data 2. [file elife-63205-fig3-data2.xlsx]

## Sheet: Figure 3D
				Growth cone	Flash position			Growth cone	Flash position			Growth cone	Flash position			Growth cone	Flash position			Growth cone	Flash position
PlxnA1																										Postion: 0 = FP entry, 50 = midline, 100 = FP exit
190925	Raw		Position 5	GC 1	330		Position 4	GC 1	317		Position 3	GC 1	274		Position 2	GC 1	308		Position 1	GC 1	299
				GC 2	315			GC 2	290			GC 2	262			GC 2	329			GC 2	296					Position	cumulative %	Position	cumulative %
				GC 3	319			FP entry	287			GC 3	285			GC 3	320			GC 3	309					PlexA1 WT		PlexA1 Y1815F
				GC 4	333			FP exit	384			GC 4	274			GC 4	304			GC 4	290					-80	0	-80	0
				GC 5	342			FP length	97			FP entry	262			GC 5	320			FP entry	285					-5	0	-70	0
				GC 6	353							FP exit	367			GC 6	318			FP exit	390				1	-1.62602	2.63158	-68.3099	1.88679			Kolmogorov-Smirnov (KS) test
				FP entry	312							FP length	105			GC 7	325			FP length	105				2	-0.719424	5.26316	-41.129	3.77358			p-value	0.0006
				FP exit	428											GC 8	323								3	0	7.89474	-34.2742	5.66038
				FP length	116											FP entry	306								4	1.62602	10.5263	-28.9017	7.54717
																FP exit	429								5	2.58621	13.1579	-26.4286	9.43396
																FP length	123								6	3.09278	15.7895	-23.9669	11.3208
																									7	4.7619	18.4211	-22.5352	13.2075
	Normalized		Position 5	GC 1	284.483		Position 4	GC 1	326.804		Position 3	GC 1	260.952		Position 2	GC 1	1.62602		Position 1	GC 1	284.762				8	6.03448	21.0526	-13.3333	15.0943
				GC 2	271.552			GC 2	298.969			GC 2	249.524			GC 2	18.6992			GC 2	281.905				9	6.66667	23.6842	-10.8871	16.9811
				GC 3	275			FP entry	295.876			GC 3	271.429			GC 3	11.3821			GC 3	294.286				10	8.14815	26.3158	-8.44156	18.8679
				GC 4	287.069			FP exit	395.876			GC 4	260.952			GC 4	-1.62602			GC 4	276.19				11	9.7561	28.9474	-8.39695	20.7547
				GC 5	294.828			FP length	100			FP entry	249.524			GC 5	11.3821			FP entry	271.429				12	10.4762	31.5789	-7.77778	22.6415
				GC 6	304.31							FP exit	349.524			GC 6	9.7561			FP exit	371.429				13	11.1111	34.2105	-7.52661	24.5283
				FP entry	268.966							FP length	100			GC 7	15.4472			FP length	100				14	11.3821	36.8421	-7.51445	26.4151
				FP exit	368.966											GC 8	13.8211								15	11.3821	39.4737	-6.87023	28.3019
				FP length	100											FP entry	0								16	11.4286	42.1053	-5.6338	30.1887
																FP exit	100								17	11.4286	44.7368	-3.52113	32.0755
																FP length	100								18	13.3333	47.3684	-2.14286	33.9623
																									19	13.8211	50	-0.826446	35.8491
																									20	15.4472	52.6316	-0.649351	37.7358
190927	Raw		Position 5	GC 1	275		Position 4	GC 1	248		Position 3	GC 1	333		Position 2	GC 1	287		Position 1	GC 1	331				21	15.5172	55.2632	0.763359	39.6226
				GC 2	287			GC 2	250			GC 2	296			FP entry	288			FP entry	306				22	16.6667	57.8947	2.08333	41.5094
				GC 3	293			GC 3	277			GC 3	292			FP exit	427			FP exit	450				23	17.3611	60.5263	2.89017	43.3962
				GC 4	265			GC 4	306			GC 4	290			FP length	139			FP length	144				24	18.1034	63.1579	3.46821	45.283
				FP entry	254			FP entry	239			FP entry	267												25	18.1159	65.7895	6.35838	47.1698
				FP exit	353			FP exit	374			FP exit	405												26	18.6992	68.4211	7.22892	49.0566
				FP length	99			FP length	135			FP length	138												27	21.0145	71.0526	7.27273	50.9434
																									28	21.2121	73.6842	7.40741	52.8302
	Normalized		Position 5	GC 1	21.2121		Position 4	GC 1	6.66667		Position 3	GC 1	47.8261		Position 2	GC 1	206.475		Position 1	GC 1	229.861				29	21.9048	76.3158	7.63359	54.717
				GC 2	33.3333			GC 2	8.14815			GC 2	21.0145			FP entry	207.194			FP entry	212.5				30	22.8571	78.9474	7.77778	56.6038
				GC 3	39.3939			GC 3	28.1481			GC 3	18.1159			FP exit	307.194			FP exit	312.5				31	25.8621	81.5789	8.33333	58.4906
				GC 4	11.1111			GC 4	49.6296			GC 4	16.6667			FP length	100			FP length	100				32	28.1481	84.2105	8.86076	60.3774
				FP entry	0			FP entry	0			FP entry	0												33	30.9278	86.8421	9.09091	62.2642
				FP exit	100			FP exit	100			FP exit	100												34	33.3333	89.4737	9.25926	64.1509
				FP length	100			FP length	21.4815			FP length	100												35	35.3448	92.1053	9.82659	66.0377
																									36	39.3939	94.7368	10.1852	67.9245
																									37	47.8261	97.3684	10.1852	69.8113
																									38	49.6296	100	10.3896	71.6981
PlxnA1 Y1815F																									41	150	100	11.0345	73.5849
190227	Raw		Position 5	GC 1	227		Position 4	GC 1	290		Positon 3	GC 1	324		Positon 2	GC 1	333		Positon 1	GC 1	269				42			11.4286	75.4717
				GC 2	246			FP entry	276			GC 2	256			GC 2	290.667			GC 2	267				43			16.2338	77.3585
				GC 3	251			FP exit	434			GC 3	191			GC 3	249			GC 3	288				44			17.9191	79.2453
				GC 4	271			FP length	158			GC 4	280			GC 4	257.5			GC 4	279				45			21.2963	81.1321
				GC 5	308							GC 5	283			GC 5	286.5			GC 5	312				46			23.1214	83.0189
				GC 6	280							FP entry	288			FP entry	300			FP entry	278				47			25.3521	84.9057
				GC 7	257							FP exit	430			FP exit	424			FP exit	409				48			25.9542	86.7925
				GC 8	190							FP length	142			FP length	124			FP length	131				49			26.4463	88.6792
				GC 9	245																				50			26.506	90.566
				FP entry	240																				51			26.6129	92.4528
				FP exit	413																				52			26.6667	94.3396
				FP length	173																				53			30	96.2264
																									54			39.3064	98.1132
	Normalized		Position 5	GC 1	-7.5		Position 4	GC 1	8.9		Positon 3	GC 1	25.4		Positon 2	GC 1	26.6		Positon 1	GC 1	-6.9				55			46.6667	100
				GC 2	3.5			FP entry	0			GC 2	-22.5			GC 2	-7.5			GC 2	-8.4							50	100
				GC 3	6.4			FP exit	100			GC 3	-68.3			GC 3	-41.1			GC 3	7.6							100	100
				GC 4	17.9			FP length	100			GC 4	-5.6			GC 4	-34.3			GC 4	0.8							150	100
				GC 5	39.3							GC 5	-3.5			GC 5	-10.9			GC 5	26
				GC 6	23.1							FP entry	0			FP entry	0			FP entry	0
				GC 7	9.8							FP exit	100			FP exit	100			FP exit	100
				GC 8	-28.9							FP length	100			FP length	100			FP length	100
				GC 9	2.9
				FP entry	0
				FP exit	100
				FP length	100
190727	Raw		Position 5	GC 1	249
				FP entry	242
				FP exit	332
				FP length	90
	Normalized		Position 5	GC 1	7.8
				FP entry	0
				FP exit	100
				FP length	100
190220	Raw		Position 5	GC 1	281		Position 4	GC 1	298		Position 3	GC 1	248		Position 2	GC 1	288
				GC 2	278			GC 2	331			GC 2	257			GC 2	235
				FP entry	266			GC 3	270			GC 3	219			GC 3	314
				FP exit	431			FP entry	299			GC 4	231			GC 4	269
				FP length	165			FP exit	420			GC 5	269			FP entry	272
								FP length	121		43922	FP entry	232			FP exit	412
												FP exit	386			FP length	140
												FP length	154
											5 only	FP entry	253
												FP exit	398
												FP length	145
	Normalized		Position 5	GC 1	9.1		Position 4	GC 1	-0.8		Position 3	GC 1	10.3896		Position 2	GC 1	11.4
				GC 2	7.3			GC 2	26.4			GC 2	16.2338			GC 2	-26.4
				FP entry	0			GC 3	-24			GC 3	-8.44156			GC 3	30
				FP exit	100			FP entry	0			GC 4	-0.649351			GC 4	-2.1
				FP length	100			FP exit	100			GC 5	11.0345			FP entry	0
								FP length	100		43922	FP entry	0			FP exit	100
												FP exit	100			FP length	100
												FP length	100
											5 only	FP entry	0
												FP exit	100
												FP length	100
190220	Raw		Position 4	GC 1	189		Position 3	GC 1	248		Position 2	GC 1	211		Position 1	GC 1	212
				GC 2	184			GC 2	236			GC 2	227			GC 2	206
				GC 3	220			GC 3	236			FP entry	205			FP entry	204
				GC 4	238			GC 4	233			FP exit	288			FP exit	300
				FP entry	196			GC 5	235			FP length	83			FP length	96
				FP exit	286			FP entry	225
				FP length	90			FP exit	333
								FP length	108
	Normalized		Position 4	GC 1	-7.8		Position 3	GC 1	21.3		Position 2	GC 1	7.2		Position 1	GC 1	8.3
				GC 2	-13.3			GC 2	10.2			GC 2	26.5			GC 2	2.1
				GC 3	26.7			GC 3	10.2			FP entry	0			FP entry	0
				GC 4	46.7			GC 4	7.4			FP exit	100			FP exit	100
				FP entry	0			GC 5	9.3			FP length	100			FP length	100
				FP exit	100			FP entry	0
				FP length	100			FP exit	100
								FP length	100
