# Supplementary material for: SlitC-PlexinA1 mediates iterative inhibition for orderly passage of spinal commissural axons through the floor plate
Source: eLife. 2020 Dec 21;9:e63205. doi: 10.7554/eLife.63205 (PMC7775108; doi:10.7554/eLife.63205)
Supplement: Figure 3—source data 3. [file elife-63205-fig3-data3.xlsx]

## Sheet: Figure 3F
Mass center PlexA1 Y1815F STED microscopy
			raw				normalized
			GC entry	GC end	Center of mass		GC entry	GC end	Center of mass	mean
PlxnA1 Y1815F	180908	GC1	6.479	19.397	12.441		0	1	0.461527	0.494789
		GC2	5.322	16.853	11.435		0	1	0.530136	0.0616396	SD
		GC3	4.683	19.38	11.112		0	1	0.437436	0.0116488	SEM
	180913 1	GC1	3.721	19.166	10.114		0	1	0.41392
		GC2	2.988	18.675	10.349		0	1	0.469242
		GC3	7.208	17.84	11.872		0	1	0.438676
	180913 2	GC1	6.326	22.22	13.674		0	1	0.462313
		GC2	5.442	20.927	13.431		0	1	0.515919					Center of mass
		GC3	3.68	23.039	11.552		0	1	0.406633				PlxnA1 Y1815F	0.494789
		GC4	8.221	22.683	15.499		0	1	0.50325
		GC5	5.463	22.77	14.085		0	1	0.49818
	191206	GC01	2.155	21.307	12.829		0	1	0.557331
		GC02	5.588	18.761	13.818		0	1	0.624763
		GC03	6.135	19.123	12.21		0	1	0.467739
		GC05	6.946	19.202	14.859		0	1	0.645643
		GC06	7.455	19.057	13.386		0	1	0.511205
		GC07	10.275	22.222	17.193		0	1	0.579058
		GC08	6.024	17.512	11.812		0	1	0.50383
		GC09	10.924	19.376	15.355		0	1	0.524255
		GC10	0.16	20.388	10.85		0	1	0.528475
		GC46	7.588	14.422	10.136		0	1	0.372842
		GC48	3.545	18.283	10.697		0	1	0.485276
		GC49	2.952	20.108	11.016		0	1	0.47004
		GC50	9.158	21.264	14.619		0	1	0.451099
		GC51	10.061	19.323	14.074		0	1	0.433276
		GC52	8.631	23.627	16.409		0	1	0.518672
		GC53	1.317	17.205	9.442		0	1	0.511392
		GC55	16.626	4.187	10.009		0	1	0.531956
Signal distribution
Raw																														Normalized
	GC1	GC2	GC3	GC1	GC2	GC3	GC1	GC2	GC3	GC4	GC5	GC01	GC02	GC03	GC05	GC06	GC07	GC08	GC09	GC10	GC46	GC48	GC49	GC50	GC51	GC52	GC53	GC55			GC1	GC2	GC3	GC1	GC2	GC3	GC1	GC2	GC3	GC4	GC5	GC01	GC02	GC03	GC05	GC06	GC07	GC08	GC09
	3.74844	1.70262	0.591687	16.3412	13.2669	15.2834	27.7302	13.8651	13.5411	5.90455	6.84261	10.1744	0.834857	4.20047	2.26373	8.61315	3.0809	8.85533	5.57032	2.87556	21.143	5.77198	12.5169	16.9029	10.9208	8.94015	14.6329	3.31471			1.96042e-05	0.116288	0.0213162	0.149671	0.151821	0.176973	0.306303	0.163497	0.147409	0.0697105	0.0761441	0.174813	0.0314207	0.10999	0.0936702	0.160413	0.100092	0.10742	0.0905228
	4.24395	2.74314	1.72716	26.027	27.5659	16.1533	30.2984	23.2209	17.891	8.5651	14.7401	12.2013	2.42025	7.5839	4.47307	10.0916	3.78732	17.3107	7.4841	3.53568	37.962	8.673	27.0808	20.0167	18.3523	11.2324	19.1599	10.3857			2.21957e-05	0.187356	0.0622229	0.238384	0.315453	0.187046	0.334671	0.27382	0.194762	0.101122	0.164026	0.209638	0.0910885	0.198586	0.18509	0.187947	0.123042	0.209988	0.121624
	4.76085	2.79003	2.2828	31.0554	27.3744	16.3556	28.166	27.2302	17.6823	8.92474	16.7749	12.2362	2.86713	7.76427	4.40192	10.5123	3.37683	16.9743	7.79028	4.13266	39.4973	9.32589	26.6606	18.4675	18.787	13.4041	21.2396	13.6145			2.48991e-05	0.190559	0.0822405	0.28444	0.313262	0.189389	0.311118	0.321098	0.19249	0.105368	0.18667	0.210237	0.107907	0.203309	0.182146	0.195782	0.109706	0.205908	0.126599
	5.81367	2.78677	2.47656	32.665	28.9682	16.9442	31.8955	27.4375	18.3242	8.07574	17.8796	12.6156	3.0075	8.76613	4.24552	11.7439	3.63738	16.543	8.22457	4.17016	40.9715	8.79396	27.6082	17.6486	18.8065	14.8448	22.7439	15.6503			3.04053e-05	0.190336	0.0892209	0.299183	0.331501	0.196204	0.352313	0.323542	0.199478	0.0953441	0.198963	0.216756	0.11319	0.229543	0.175674	0.218719	0.11817	0.200675	0.133657
	6.4517	2.80098	2.69261	35.3398	31.2188	17.8613	32.3261	28.5592	20.3006	8.64193	17.6302	12.2092	3.25806	10.2638	4.14102	11.6298	4.09512	17.3912	8.33472	4.83305	40.922	9.43136	27.7988	17.6883	18.2045	16.5392	21.3529	17.1175			3.37421e-05	0.191306	0.0970046	0.323682	0.357255	0.206824	0.357069	0.336769	0.220994	0.102029	0.196188	0.209773	0.12262	0.26876	0.17135	0.216596	0.133041	0.210965	0.135447
	7.10143	3.0041	2.91958	35.9968	30.7796	21.8714	34.0729	29.7294	20.2981	24.4355	19.9143	11.8132	3.42138	10.2139	4.77982	12.1632	4.59695	19.022	9.8873	5.01167	39.3528	11.7427	27.1402	18.86	17.4637	16.4824	22.174	17.653			3.71402e-05	0.205179	0.105181	0.329699	0.352229	0.253259	0.376364	0.350569	0.220966	0.288491	0.221605	0.20297	0.128767	0.267453	0.197783	0.226529	0.149345	0.230747	0.160678
	7.77123	2.92483	4.82319	35.827	32.9266	26.8052	35.0992	31.3214	21.1744	33.3869	20.3877	11.4794	3.47639	11.1567	4.87437	13.4921	4.97132	18.4319	13.0233	5.23267	37.6613	11.226	29.4194	21.4392	19.4559	16.803	22.897	18.3259			4.06432e-05	0.199766	0.173761	0.328144	0.376799	0.31039	0.387701	0.369341	0.230505	0.394173	0.226873	0.197235	0.130837	0.292139	0.201695	0.251279	0.161507	0.223588	0.211641
	8.43962	2.79738	6.95491	37.8547	36.0575	33.1741	38.5311	30.1325	24.7671	35.8636	20.3652	10.9735	3.86521	12.4939	4.94751	14.3816	5.6884	18.9198	15.3644	5.95263	36.0968	10.7159	29.5257	23.69	23.8815	18.2712	23.4111	17.8077			4.41389e-05	0.191061	0.250559	0.346715	0.412628	0.384139	0.425609	0.355322	0.269615	0.423415	0.226622	0.188543	0.145471	0.327155	0.204722	0.267845	0.184803	0.229508	0.249686
	8.60023	3.00196	9.26931	42.492	39.279	37.2684	39.5132	31.2434	29.476	38.7641	21.3304	11.001	4.46313	13.8324	5.00897	14.6386	6.66517	20.278	17.3835	6.67883	35.957	10.4629	28.9192	24.5521	24.2766	20.0164	25.1262	17.7443			4.49789e-05	0.205033	0.333938	0.389189	0.449494	0.431548	0.436457	0.368422	0.320876	0.457659	0.237364	0.189014	0.167974	0.362203	0.207265	0.272632	0.216536	0.245983	0.282497
	8.07867	3.33332	13.1296	44.1966	35.3103	39.0449	35.4033	33.2303	36.4149	39.5136	17.7645	11.1006	4.92761	16.4311	5.24137	14.5342	6.71317	20.6997	17.7436	7.01329	37.5845	10.7639	31.6836	23.5058	26.4208	20.3686	25.9534	20.3737			4.22511e-05	0.227665	0.47301	0.404802	0.404077	0.452119	0.391059	0.39185	0.396414	0.466507	0.197682	0.190726	0.185456	0.430252	0.216881	0.270688	0.218096	0.251098	0.288351
	8.15702	3.69035	12.7863	47.2364	34.1177	38.8902	32.1131	39.1505	41.8513	35.1308	16.2882	11.5247	5.17897	21.0062	5.20255	14.8379	6.7358	21.7149	25.4585	7.2129	36.2823	11.0503	33.5015	24.8693	29.336	22.451	27.5123	24.6043			4.26609e-05	0.25205	0.460641	0.432644	0.39043	0.450327	0.354717	0.461662	0.455594	0.414762	0.181254	0.198013	0.194916	0.550051	0.215275	0.276343	0.218831	0.263413	0.413724
	8.89131	3.90296	11.459	50.1613	34.0926	38.6817	29.3128	46.8571	49.8418	32.7611	17.5839	12.0899	5.33833	23.3383	5.69872	16.7166	6.83122	23.3391	27.0784	8.39838	41.2985	12.6635	34.271	24.7325	30.3065	23.6282	28.905	26.6507			4.65012e-05	0.266571	0.412824	0.459434	0.390143	0.447913	0.323785	0.552538	0.542579	0.386786	0.195672	0.207724	0.200913	0.611118	0.235806	0.311334	0.221931	0.283116	0.440049
	9.32487	3.98203	11.3361	55.7048	32.4484	40.8355	28.6594	50.64	49.8917	31.5353	20.9566	13.3329	5.9305	22.7591	5.66793	20.3658	6.87347	25.5264	27.1091	9.69738	42.3923	15.521	34.5816	25.7075	30.239	26.2198	26.9277	29.8233			4.87687e-05	0.271972	0.408395	0.510207	0.371327	0.472853	0.316567	0.597146	0.543123	0.372314	0.233203	0.229081	0.2232	0.59595	0.234532	0.379296	0.223304	0.309649	0.440549
	9.58212	3.57517	11.2886	58.9714	31.1429	48.969	33.2652	50.8569	52.9424	32.9414	23.6979	12.8591	6.36733	22.3906	5.57336	22.5184	6.76903	25.0446	27.2882	10.0596	43.1253	19.3694	33.5176	27.2143	32.388	26.0837	24.8891	31.8013			5.01141e-05	0.244183	0.406686	0.540126	0.356387	0.567035	0.367443	0.599703	0.576333	0.388914	0.263709	0.22094	0.239641	0.586301	0.230618	0.419387	0.219911	0.303804	0.443458
	9.72877	3.33987	11.2147	63.4508	29.284	50.5941	35.5803	48.2735	55.2855	33.4052	26.6852	12.5503	6.63015	23.2881	6.0984	22.8495	7.16635	26.5923	28.6729	9.86714	45.3737	24.3499	33.9959	28.6767	32.6013	27.8916	24.6936	35.9698			5.08811e-05	0.228112	0.404021	0.581154	0.335115	0.585852	0.393015	0.56924	0.60184	0.394389	0.29695	0.215634	0.249532	0.609804	0.252344	0.425552	0.232819	0.322578	0.46596
	9.93117	3.37548	12.1762	69.2506	29.5491	47.3128	39.0073	48.6489	55.2114	30.7005	32.2332	13.0049	6.8341	24.4772	6.64233	26.0702	6.79438	27.5556	29.8496	10.9742	47.0243	24.5312	36.4947	32.3121	34.1	27.8114	24.9926	39.674			5.19396e-05	0.230545	0.438663	0.634275	0.338148	0.547856	0.430869	0.573666	0.601033	0.362457	0.358689	0.223445	0.257208	0.640941	0.274851	0.485535	0.220734	0.334264	0.485083
	9.78623	3.27858	12.8191	70.635	29.4916	49.8331	48.7917	51.1419	56.8797	31.904	40.5845	14.2768	7.17224	23.8619	7.76507	26.7833	6.6555	30.7126	34.6388	11.2803	45.8303	18.8437	35.7249	34.3317	37.0243	29.1414	25.2849	44.1963			5.11816e-05	0.223927	0.461823	0.646954	0.337491	0.577041	0.538945	0.603064	0.619195	0.376667	0.451621	0.245298	0.269935	0.624829	0.321309	0.498817	0.216222	0.37256	0.562912
	9.87887	2.85047	14.3542	69.7666	29.7059	53.3058	63.2546	51.9145	59.922	32.9111	45.9225	15.2762	7.23847	23.7176	7.3545	25.9088	6.7802	30.7867	43.6409	11.9381	46.9535	16.0615	31.8201	34.0158	38.5299	30.893	22.8235	47.652			5.16661e-05	0.194686	0.517127	0.639001	0.339942	0.617252	0.698701	0.612174	0.652313	0.388556	0.511022	0.262469	0.272427	0.621051	0.30432	0.482529	0.220274	0.373459	0.709204
	9.94202	2.94608	15.6542	70.7708	32.0781	54.43	73.3013	53.2969	63.9937	41.3672	50.4063	16.2614	7.4612	23.0072	7.49903	27.1096	7.21528	33.4271	47.8962	12.0821	48.0727	17.4425	32.7033	32.8121	38.813	31.5604	21.614	49.6392			5.19964e-05	0.201217	0.563961	0.648199	0.367089	0.630269	0.809676	0.628475	0.696638	0.488391	0.560917	0.279398	0.28081	0.602449	0.310301	0.504894	0.234408	0.405489	0.778357
	10.2246	3.29083	15.8987	66.8176	35.5898	55.1341	79.5033	50.9492	65.7968	40.8765	49.3194	17.6426	7.07033	23.1286	7.48323	29.1705	7.47193	35.7086	51.0814	13.2605	49.7843	16.3376	32.2066	33.9508	42.599	34.4927	21.6121	52.36			5.34745e-05	0.224763	0.57277	0.61199	0.407276	0.638423	0.878182	0.600792	0.716267	0.482598	0.548823	0.303129	0.266099	0.605626	0.309647	0.543276	0.242746	0.433164	0.830119
	9.52295	3.14545	15.4901	62.9288	36.4716	56.9636	76.4378	49.3799	66.2982	38.8293	45.6962	18.1565	6.87097	21.8406	7.5753	28.9965	6.9532	40.3025	52.8231	13.6879	53.5887	13.8941	31.1189	34.3121	46.5714	35.6107	21.1348	51.6722			4.98047e-05	0.214834	0.558047	0.576372	0.417366	0.659607	0.844321	0.582287	0.721725	0.458428	0.508504	0.311958	0.258596	0.5719	0.313456	0.540035	0.225894	0.488891	0.858424
	9.22102	3.11028	15.0539	65.3202	39.3315	57.7045	66.9676	47.5273	66.5709	37.6728	46.9259	18.0041	5.97716	20.2719	7.90387	30.0982	7.46528	43.3737	52.733	13.2615	55.6575	17.8745	30.2547	33.5125	49.9273	34.9645	19.7641	49.8653			4.82256e-05	0.212432	0.542333	0.598275	0.450094	0.668187	0.739714	0.56044	0.724693	0.444774	0.522188	0.30934	0.224956	0.530824	0.327052	0.560554	0.24253	0.526146	0.85696
	9.72154	3.6451	14.5159	72.7098	38.51	56.3544	53.2783	47.5189	67.2392	34.2692	50.1753	18.9173	6.0603	19.7311	7.68268	31.1132	8.30375	44.5377	52.9174	13.9534	57.0107	22.9614	30.7851	32.5458	52.6283	34.8332	19.7402	48.5574			5.08433e-05	0.24896	0.522951	0.665958	0.440694	0.652553	0.588504	0.560341	0.731969	0.40459	0.558348	0.32503	0.228085	0.516663	0.3179	0.579456	0.26977	0.540267	0.859956
	10.6944	4.31617	15.0421	72.9588	35.6592	53.9059	43.6085	53.3675	72.9058	35.56	54.5139	26.8623	5.83782	17.4157	7.66378	33.0168	8.19112	42.2044	52.3085	14.3941	55.4275	21.4118	33.5176	30.6871	50.3792	35.8166	20.7935	46.6805			5.59316e-05	0.294793	0.541911	0.668238	0.40807	0.624201	0.481693	0.629308	0.793655	0.41983	0.606626	0.461538	0.219712	0.456034	0.317118	0.614911	0.266111	0.511962	0.850061
	11.6486	4.3987	15.9965	70.5206	33.5636	54.0443	43.4286	56.157	74.4405	43.8444	57.3825	33.3406	5.64036	15.9083	7.65417	35.1447	8.35717	43.4717	52.1377	15.5528	55.828	19.4678	35.9108	30.6108	53.0857	36.277	19.1164	46.0082			6.09216e-05	0.30043	0.576292	0.645907	0.384089	0.625804	0.479705	0.662201	0.810362	0.517638	0.638548	0.572845	0.212281	0.416563	0.31672	0.654541	0.271506	0.527335	0.847286
	13.0114	4.4706	16.3126	67.119	31.5435	54.8859	41.9365	55.4786	76.488	49.5611	45.5029	35.8456	5.48193	14.5009	8.16044	37.157	9.01477	46.7217	50.6886	17.2951	56.75	18.9766	36.3733	29.0786	51.7896	36.5763	18.3333	46.0232			6.8049e-05	0.305341	0.587682	0.614751	0.360972	0.635549	0.463224	0.654202	0.832651	0.58513	0.506353	0.615885	0.206318	0.37971	0.337669	0.692018	0.29287	0.566759	0.823736
	14.4179	4.70098	15.1674	66.7382	32.38	54.1657	40.6124	57.3534	76.4677	51.8692	47.93	34.6105	5.08296	13.0244	9.49007	39.1605	9.59177	48.8396	53.1229	17.7446	59.2337	17.3237	37.3076	27.625	48.3636	39.1923	19.5502	47.2957			7.54049e-05	0.321076	0.546425	0.611263	0.370544	0.62721	0.448599	0.676309	0.83243	0.612381	0.533361	0.594663	0.191302	0.341048	0.392687	0.729332	0.311615	0.592451	0.863296
	15.5084	5.0482	15.8397	68.543	35.0921	64.4775	37.625	57.3775	83.6715	49.0273	47.824	33.2732	4.84487	12.6472	11.0276	39.0403	10.1975	49.8396	53.6398	18.1534	60.328	17.9238	43.3376	26.73	52.1701	40.3416	20.6526	48.54			8.11085e-05	0.344791	0.570642	0.627794	0.40158	0.746615	0.4156	0.676593	0.910852	0.578828	0.532182	0.571688	0.182342	0.331169	0.456307	0.727094	0.331293	0.604581	0.871697
	17.2246	5.77777	16.6387	69.5475	39.2743	74.094	36.8982	58.8177	89.2103	45.9714	53.7801	30.6285	5.01703	12.0494	11.4346	42.3295	10.4278	51.4706	57.6127	17.8067	62.8347	20.1323	38.2459	27.905	59.3182	36.3523	20.973	49.3803			9.00842e-05	0.39462	0.59943	0.636994	0.44944	0.857969	0.407572	0.693576	0.971147	0.542749	0.598461	0.526247	0.188821	0.315517	0.47315	0.788351	0.338778	0.624367	0.936259
	16.6244	6.55684	17.0316	71.5316	44.0112	79.568	38.5628	61.3515	86.4734	42.7758	53.6441	29.782	4.7047	12.1652	11.8734	45.0517	9.25303	52.3553	51.6642	17.7333	65.1717	21.3042	32.9444	29.1733	58.7678	35.4995	22.0919	51.6347			8.6945e-05	0.447831	0.613584	0.655166	0.503646	0.921354	0.425959	0.723455	0.941353	0.505021	0.596947	0.511703	0.177066	0.318549	0.491306	0.839051	0.30061	0.635098	0.83959
	14.5911	7.40685	17.1873	73.6334	48.606	81.4357	39.6991	63.9951	91.0304	42.7654	48.9462	30.8979	5.07144	12.1922	13.3414	45.6605	9.6054	51.0739	47.2638	18.352	69.4252	23.3571	35.6836	31.5643	55.9636	34.4714	22.1562	52.9295			7.63108e-05	0.505886	0.619194	0.674417	0.556228	0.942981	0.43851	0.754628	0.99096	0.504899	0.54467	0.530876	0.190869	0.319256	0.552049	0.850389	0.312058	0.619554	0.76808
	12.6437	7.64378	17.6993	75.4492	57.5262	79.0941	46.523	63.3045	91.8608	47.0515	50.0914	29.3224	5.40226	12.78	14.3551	45.3789	9.94323	49.2019	47.1123	18.3498	72.2983	23.6353	35.9017	30.8192	57.3169	34.3506	24.2598	56.042			6.61262e-05	0.522069	0.637637	0.691048	0.658308	0.915866	0.513887	0.746485	1	0.555501	0.557414	0.503805	0.203319	0.334646	0.593997	0.845145	0.323033	0.596845	0.765618
	13.0882	7.62827	18.6481	76.8622	60.7863	70.1644	53.0185	55.1003	88.1475	46.4972	55.4421	28.8338	5.5094	15.2728	14.397	47.5863	10.5483	52.12	47.2932	18.5016	80.6915	23.2517	35.2595	34.57	60.9188	36.8983	25.6066	56.073			6.84506e-05	0.521009	0.671821	0.70399	0.695614	0.812466	0.585635	0.649741	0.959577	0.548957	0.616956	0.495411	0.207352	0.39992	0.595729	0.886255	0.342691	0.632244	0.768559
	13.06	7.48434	19.0779	74.5984	58.7254	67.5527	53.6812	52.6203	82.5386	43.3944	59.577	28.6226	6.06641	17.8148	14.7984	48.6447	11.3976	55.3716	45.8125	18.8558	87.653	22.5865	37.3923	36.4721	62.0143	35.1441	26.5582	61.3682			6.83035e-05	0.511179	0.687303	0.683256	0.672031	0.782224	0.592955	0.620497	0.898519	0.512325	0.662968	0.491782	0.228316	0.466483	0.612339	0.905967	0.370284	0.671687	0.744495
	12.8913	7.08907	18.8454	76.5002	58.2406	67.2858	47.5609	54.7913	79.6062	43.6838	66.0365	28.4806	6.64919	20.9248	15.5179	49.1097	11.8219	56.4203	46.1663	19.6528	93.1895	23.1724	39.0297	37.7083	56.6598	34.4078	27.341	60.9038			6.74211e-05	0.484182	0.678929	0.700674	0.666482	0.779133	0.52535	0.646098	0.866596	0.515742	0.734849	0.489342	0.250249	0.547919	0.642113	0.914626	0.384066	0.684409	0.750245
	12.9553	6.72387	18.0656	77.5873	58.3834	69.6917	46.4784	52.8906	71.8228	42.1583	73.408	29.2985	6.92396	22.5589	15.8811	50.0965	12.1908	58.5176	47.2108	20.9609	96.5567	23.9475	41.4614	37.0907	54.5292	32.8559	29.4945	60.7317			6.77557e-05	0.459239	0.650833	0.710632	0.668116	0.806992	0.513394	0.623684	0.781866	0.49773	0.816879	0.503396	0.26059	0.590709	0.657139	0.933005	0.396052	0.70985	0.767219
	14.3944	6.27842	16.3226	81.4142	60.5832	73.6297	49.7599	47.2312	64.369	43.4081	78.0845	28.7376	8.16303	23.5024	16.6019	52.8833	11.9752	61.2075	48.2023	21.6909	97.6593	23.042	38.0305	39.505	56.0611	34.0498	27.9461	64.9415			7.52822e-05	0.428815	0.588041	0.745682	0.69329	0.852592	0.549641	0.556949	0.700723	0.512486	0.868918	0.493758	0.307224	0.615415	0.686966	0.984908	0.389048	0.74248	0.783332
	15.1582	5.95098	16.5732	85.157	63.3242	78.9848	61.0377	43.0461	58.8931	46.0269	80.5486	25.517	8.52263	21.1283	16.7968	53.6937	11.638	62.7972	48.1119	23.225	94.8173	22.0413	34.8083	38.9342	62.6753	35.3789	29.8652	72.3729			7.92768e-05	0.406451	0.597068	0.779963	0.724657	0.914601	0.674213	0.507598	0.641112	0.543405	0.896339	0.438424	0.320758	0.55325	0.69503	1	0.378092	0.761763	0.781862
	15.7278	5.66422	18.168	92.254	63.0608	82.8465	62.6138	46.8628	59.0994	54.2424	79.3999	25.3653	8.78821	21.7824	17.5299	51.3798	11.6165	61.4114	45.0254	25.0123	95.0422	21.7846	34.3523	37.7236	67.2532	34.7542	34.0025	77.7838			8.22556e-05	0.386865	0.654523	0.844965	0.721643	0.959317	0.691622	0.552605	0.643358	0.640399	0.883556	0.435817	0.330753	0.570376	0.725367	0.956906	0.377395	0.744954	0.731704
	15.599	6.52207	18.339	101.9	61.9549	81.6414	62.0489	51.6053	57.4247	57.7924	65.401	25.5926	10.1542	23.5539	18.325	48.1325	11.1377	62.295	37.6017	27.5627	92.4217	22.4634	33.4528	37.1725	68.2143	33.313	34.231	83.8947			8.15823e-05	0.445456	0.660684	0.933314	0.708987	0.945363	0.685383	0.608528	0.625128	0.68231	0.727778	0.439723	0.382163	0.616763	0.758266	0.896427	0.361839	0.755672	0.611062
	15.1075	7.50094	18.6773	105.676	56.9782	76.9799	63.1748	54.3602	53.7335	58.9535	58.3339	26.4278	13.0474	26.7357	18.1212	46.9114	11.3367	67.9167	38.1864	30.4135	93.4373	22.8337	31.7568	32.725	66.5909	35.3332	34.7586	83.8387			7.90116e-05	0.512313	0.67287	0.967899	0.652036	0.891385	0.69782	0.641014	0.584946	0.696019	0.649135	0.454072	0.491053	0.70008	0.749831	0.873685	0.368302	0.823865	0.620565
	15.9348	8.41587	20.4555	104.58	53.3543	75.412	60.0774	56.8825	54.8627	62.3625	53.8492	25.8753	12.6149	26.825	17.2372	47.1989	12.2892	73.8328	38.7687	30.9085	98.073	23.1914	30.0061	26.815	63.5958	36.1755	35.8952	81.878			8.33382e-05	0.574802	0.736934	0.957857	0.610566	0.87323	0.663606	0.670757	0.597237	0.736267	0.59923	0.444579	0.474776	0.702418	0.713252	0.879041	0.39925	0.895632	0.630026
	16.2633	8.92645	21.0445	108.213	50.9481	74.7603	60.0119	67.7878	52.6983	63.6066	49.9658	26.0332	12.2813	24.8976	17.3317	45.4982	12.8004	75.3983	39.8421	29.4192	98.1593	25.7589	29.0102	24.915	62.5247	35.7458	38.7273	84.6117			8.50563e-05	0.609675	0.758153	0.991136	0.58303	0.865684	0.662883	0.799352	0.573676	0.750954	0.556016	0.447293	0.462218	0.651949	0.717165	0.847366	0.415857	0.914622	0.647472
	17.7198	8.5559	23.0416	109.181	51.6853	71.8176	67.0258	84.0338	46.6304	57.7429	50.2824	26.9608	11.6338	24.6117	17.3442	45.5544	13.529	74.6799	40.7627	25.5077	92.8763	25.1978	32.4154	23.4143	62.2169	35.6822	40.2745	84.0983			9.26739e-05	0.584366	0.8301	1	0.591466	0.831609	0.740357	0.990924	0.50762	0.681727	0.559539	0.46323	0.437851	0.644461	0.717682	0.848412	0.439526	0.905907	0.662432
	19.6242	9.38808	25.0328	104.164	52.8053	69.5886	73.0186	84.8035	44.8563	57.0157	51.287	25.865	11.043	24.8376	17.8096	42.6219	13.5006	76.0383	41.0042	25.4438	86.8812	25.3996	31.2812	24.7117	60.5795	36.6732	41.8579	86.7745			0.000102634	0.641204	0.901836	0.954047	0.604282	0.805798	0.806553	1	0.488308	0.673141	0.570718	0.444402	0.415615	0.650378	0.736939	0.793798	0.438604	0.922385	0.666356
	19.7754	11.0155	25.9485	102.288	51.2698	70.7014	75.7103	65.9765	41.2595	57.0318	47.2575	27.6456	11.535	26.9311	18.3279	41.2	13.5133	78.7485	41.1208	26.8236	80.7447	24.3516	31.5257	27.0986	57.8896	38.5577	42.6826	87.2877			0.000103424	0.752359	0.934825	0.936871	0.586712	0.818684	0.836285	0.777993	0.449153	0.673331	0.525878	0.474996	0.43413	0.705197	0.758385	0.767315	0.439016	0.955261	0.66825
	18.9317	11.0744	27.3367	104.967	50.6624	73.6893	75.5178	57.1053	35.9494	60.7115	42.1551	31.4017	10.8096	26.4062	18.9907	40.9842	13.2699	80.4785	42.2237	27.7992	73.2115	23.8867	30.5884	29.9167	60.9481	38.5611	45.424	86.065			9.9012e-05	0.756376	0.984835	0.961402	0.57976	0.853282	0.834159	0.673384	0.391346	0.716775	0.469099	0.539533	0.40683	0.691451	0.785811	0.763296	0.43111	0.976248	0.686175
	18.1848	10.9676	27.7576	105.752	49.3365	78.5132	78.6124	60.7418	37.0013	65.3454	47.4022	33.3964	10.2227	24.6161	20.1458	40.0456	12.4136	77.8925	42.2987	28.5891	63.618	26.2243	29.8035	30.0208	62.6445	38.2219	44.0215	87.7773			9.51057e-05	0.749088	1	0.968597	0.564587	0.90914	0.868341	0.716265	0.402797	0.771484	0.527488	0.573804	0.384743	0.644578	0.833609	0.745816	0.403291	0.944877	0.687393
	18.5894	11.1953	27.1086	101.035	51.3175	86.3598	84.3623	66.7162	38.5443	63.2374	51.5868	36.5277	10.2051	23.5957	20.5965	41.3596	11.9635	81.0571	41.572	28.8774	64.4797	29.8267	31.3026	31.0129	60.261	39.5916	45.0453	89.5131			9.72217e-05	0.764634	0.976619	0.925392	0.587257	1	0.931854	0.786715	0.419595	0.746595	0.574054	0.627604	0.384078	0.617859	0.852257	0.770289	0.388666	0.983266	0.675584
	19.1967	11.6896	24.6036	100.208	51.7997	84.858	90.5317	66.6538	40.4614	68.0273	49.2465	38.4721	9.48483	21.4361	22.3734	38.6684	13.2032	82.4366	42.0095	28.7407	61.1207	28.8281	32.1626	30.4858	60.5961	40.6049	45.9785	88.998			0.000100398	0.798394	0.886374	0.917814	0.592775	0.98261	1	0.785979	0.440464	0.803146	0.548012	0.661012	0.356971	0.561309	0.925782	0.720167	0.428942	1	0.682693
	17.599	11.7712	23.1112	100.879	52.6791	77.2245	88.8988	59.9633	40.4196	72.0384	57.7257	39.8353	9.83947	20.9343	22.8681	38.6789	14.1962	73.1137	41.5839	28.9969	57.2335	25.8501	29.5915	31.6614	61.3234	39.946	47.9243	90.0283			9.20423e-05	0.803973	0.83261	0.923965	0.602839	0.894218	0.981963	0.707086	0.44001	0.850502	0.642367	0.684435	0.370318	0.548168	0.946253	0.720363	0.461204	0.886909	0.675777
	17.5229	12.3108	23.6657	96.676	55.3332	70.7594	83.4577	58.1889	41.2363	75.1465	76.9178	40.3288	9.74665	20.2333	23.0692	37.5611	15.3859	68.4409	41.572	29.148	53.0107	23.1038	31.5579	31.3875	61.0308	38.8118	49.6863	88.642			9.16443e-05	0.840824	0.852585	0.885467	0.633211	0.819355	0.921861	0.686162	0.4489	0.887197	0.855936	0.692913	0.366825	0.529814	0.954576	0.699543	0.499852	0.830224	0.675584
	16.6346	12.4567	23.6616	99.9457	61.1786	64.0595	77.5165	56.7887	42.5051	72.2101	89.864	42.493	9.95526	20.4156	23.9183	36.6394	16.2044	69.0906	41.1292	29.5339	50.6723	22.5223	31.5285	29.2225	60.7572	41.9306	51.1287	91.8773			8.69982e-05	0.85079	0.852436	0.915414	0.700103	0.741774	0.856236	0.66965	0.462712	0.85253	1	0.730097	0.374676	0.534586	0.989708	0.682379	0.526445	0.838107	0.668388
	15.9444	12.768	21.8417	106.968	65.87	58.4387	79.1094	53.3036	42.711	73.0051	88.8484	46.7997	10.1974	21.6305	23.9647	35.0728	17.0075	68.1169	41.6833	29.7627	49.8065	21.4136	34.6997	27.1507	60.4338	44.6695	51.5846	93.0101			8.33888e-05	0.872051	0.786873	0.979735	0.75379	0.676689	0.87383	0.628554	0.464953	0.861915	0.988698	0.804094	0.383789	0.566398	0.99163	0.653201	0.552537	0.826294	0.677392
	15.7742	12.8441	19.3735	101.963	68.1495	52.776	85.756	54.9358	44.4228	70.4207	80.3599	48.7934	10.2367	23.8839	23.6218	35.1237	17.6576	68.2208	41.9714	36.818	45.339	18.5184	34.8998	25.0417	59.2873	47.6239	52.9436	94.4452			8.24982e-05	0.877249	0.697955	0.933895	0.779876	0.611118	0.947247	0.647802	0.483588	0.831404	0.894239	0.83835	0.38527	0.625405	0.97744	0.654149	0.573657	0.827554	0.682074
	15.5611	13.0425	17.6464	95.5652	68.4459	49.1942	87.9273	55.7904	50.162	74.986	64.5075	45.1106	10.2641	24.2214	24.167	35.6189	18.8336	69.6289	41.4848	41.272	42.8727	18.7896	44.1913	24.9836	60.5584	47.3995	50.8125	96.6997			8.13838e-05	0.8908	0.635731	0.875293	0.783268	0.569642	0.971231	0.657879	0.546066	0.885302	0.717835	0.775072	0.386301	0.634243	1	0.663373	0.611863	0.844636	0.674166
	14.9457	12.7247	15.6844	92.2578	68.7024	49.8665	85.7295	54.5714	60.5752	76.7545	34.0434	47.39	9.87097	26.4661	24.0279	34.3544	20.6262	73.3841	41.9248	38.1954	40.9487	18.452	38.2202	24.5417	63.1714	49.0069	42.6164	98.7508			7.81652e-05	0.869091	0.56505	0.845001	0.786203	0.577427	0.946955	0.643505	0.659425	0.906182	0.378833	0.814236	0.371504	0.693021	0.994244	0.639821	0.6701	0.890189	0.681317
	14.9886	13.5523	14.083	86.4888	69.6378	48.8974	82.9784	58.3799	70.8513	78.3367	31.7911	52.3994	9.55126	31.0029	23.4692	32.9386	22.2062	72.0011	42.2002	30.1151	36.5705	20.2511	35.9912	23.5625	60.8036	52.8448	38.8927	101.281			7.83899e-05	0.925619	0.507357	0.792161	0.796908	0.566206	0.916567	0.688414	0.77129	0.924862	0.353769	0.900306	0.359471	0.811816	0.971127	0.613453	0.72143	0.873411	0.685792
	14.8998	14.3706	13.7032	85.0332	70.9916	45.6117	76.8287	67.9182	74.5848	84.701	32.93	53.6912	9.76191	34.5928	21.7804	32.4781	24.5012	68.0553	46.4724	26.1998	33.8173	21.291	37.4505	24.64	61.0377	50.9836	36.3572	103.044			7.79252e-05	0.981508	0.493672	0.778829	0.8124	0.528158	0.848638	0.80089	0.811933	1	0.366442	0.922501	0.367399	0.905818	0.901247	0.604877	0.79599	0.825548	0.75522
	14.3925	14.6413	13.709	87.8572	76.9559	41.3392	77.494	76.7163	76.571	79.4399	34.8374	56.8226	14.4768	35.5671	21.476	33.0886	25.4828	69.9927	51.804	25.5506	29.7518	21.0223	43.0251	25.6608	59.7338	47.9719	37.7843	102.906			7.52722e-05	1	0.493884	0.804694	0.880653	0.478685	0.855988	0.904636	0.833555	0.937886	0.387668	0.976304	0.544848	0.931333	0.888648	0.616247	0.827879	0.849049	0.841863
	14.8012	13.6397	13.3349	86.238	86.0279	39.9102	82.9259	73.9793	68.788	76.9557	34.6597	57.1735	22.5567	34.5189	20.9718	32.7411	26.3315	69.3171	55.6195	24.6331	27.4677	21.6357	42.8331	25.7536	58.4383	48.8547	44.8523	104.717			7.74099e-05	0.931589	0.480405	0.789864	0.984469	0.462139	0.915987	0.872362	0.748829	0.908557	0.385691	0.982333	0.848943	0.903884	0.867787	0.609775	0.855452	0.840853	0.903868
	14.6908	12.3529	13.2679	81.6984	87.385	41.3169	81.3415	71.8018	72.8361	73.7293	31.3267	57.1497	26.5703	34.1695	20.6603	33.5719	28.1805	63.576	61.3909	24.1583	24.2377	21.9219	40.7927	26.0842	56.2545	47.9312	49.5215	101.018			7.68324e-05	0.843702	0.477993	0.748285	1	0.478427	0.898486	0.846685	0.792897	0.870465	0.348601	0.981923	1	0.894736	0.854896	0.625249	0.915523	0.771211	0.997658
	15.1498	11.6185	13.4403	74.17	85.561	46.543	69.7268	71.3975	68.6786	71.7222	33.8773	57.7635	25.5735	36.2967	20.1622	34.6096	29.1253	57.7667	61.1907	23.9794	20.4893	21.7085	38.9444	27.0183	54.8026	51.4078	50.0141	101.811			7.92327e-05	0.793539	0.484201	0.679332	0.979126	0.538943	0.770192	0.841918	0.747638	0.846769	0.376984	0.992471	0.962486	0.950435	0.834285	0.644575	0.946216	0.700741	0.994405
	15.9296	11.862	13.8173	70.1283	79.4676	50.9988	56.2546	71.4915	55.9779	71.3859	35.2089	58.2018	18.6448	38.1895	20.5533	33.4351	30.7808	55.4822	61.535	24.8165	20.2925	24.0826	39.7568	29.7014	53.7629	53.2113	47.4553	99.3223			8.33113e-05	0.810169	0.497786	0.642314	0.909396	0.590538	0.62138	0.843026	0.609377	0.842798	0.391802	1	0.701715	1	0.850469	0.6227	1	0.673029	1
	16.1147	12.2639	14.2693	63.0446	73.3611	51.6917	54.1263	71.5485	53.6765	68.7817	34.8565	56.5897	16.3362	40.1417	21.0365	33.4053	31.7071	53.7212	61.3754	26.0964	19.7957	23.4715	37.6369	31.7158	48.1182	53.1156	45.815	92.9764			8.42794e-05	0.837622	0.514069	0.577433	0.839515	0.598562	0.597871	0.843698	0.584325	0.812053	0.38788	0.972302	0.614831	1.05112	0.870466	0.622145	1.03009	0.651667	0.997407
	12.7205	12.599	13.8443	60.3046	62.7511	47.6054	58.4239	72.7218	47.9703	68.1439	35.3837	51.2517	16.711	42.771	22.0849	33.7974	32.3852	54.1991	62.9629	27.6786	18.2117	22.7095	39.9695	32.9814	45.8091	51.7685	45.2114	81.7465			6.65277e-05	0.86051	0.498757	0.552337	0.718099	0.551245	0.645342	0.857533	0.522206	0.804523	0.393747	0.880586	0.628935	1.11997	0.913846	0.629448	1.05212	0.657465	1.02321
	12.535	12.0498	14.5456	59.9802	52.5413	43.1729	59.651	69.097	41.3671	72.1027	41.4103	49.6259	17.0626	43.7472	23.5753	33.014	35.1555	53.6113	63.679	30.1722	17.417	22.1507	43.8726	33.6958	42.8653	48.5954	48.3474	72.5575			6.55577e-05	0.823001	0.524022	0.549366	0.601262	0.499919	0.658896	0.81479	0.450324	0.851261	0.460811	0.852653	0.642167	1.14553	0.975518	0.614859	1.14212	0.650334	1.03484
	12.1594	11.9363	16.0398	57.8748	44.2579	34.983	58.8168	65.1833	39.2433	76.0621	39.9549	49.0382	17.7556	44.5571	24.7208	34.8149	37.3883	55.0718	62.9269	34.1685	17.0525	21.3452	43.689	32.8325	41.5	49.321	49.5659	69.8295			6.35932e-05	0.815246	0.577853	0.530082	0.50647	0.405084	0.649682	0.768639	0.427204	0.898007	0.444615	0.842556	0.668249	1.16674	1.02292	0.648398	1.21466	0.66805	1.02262
	12.5859	11.2539	16.0006	59.4984	39.5915	28.681	62.3975	68.3459	29.8532	77.9076	41.4612	47.2549	17.6421	39.5162	27.4625	35.3745	39.2331	56.2715	62.535	36.5024	15.4277	20.9542	41.8571	33.4136	34.2091	54.8787	52.5478	68.1437			6.58239e-05	0.76864	0.57644	0.544953	0.45307	0.332111	0.689233	0.805932	0.324983	0.919795	0.461378	0.811915	0.663977	1.03474	1.13636	0.658821	1.2746	0.682603	1.01625
	12.692	11.165	16.4859	58.5913	35.8125	22.8258	66.3069	72.463	21.9361	80.6812	41.6997	44.9041	17.2525	35.0589	33.4569	36.9842	41.4511	55.3459	60.0933	37.1726	13.5605	21.2556	43.8449	31.6558	28.9156	52.592	52.3352	67.9136			6.63788e-05	0.762569	0.593925	0.536645	0.409824	0.264311	0.732416	0.854481	0.238797	0.952542	0.464031	0.771525	0.649314	0.918023	1.3844	0.6888	1.34665	0.671376	0.976571
	12.9553	10.3718	17.3299	55.473	31.2394	20.2227	72.9167	65.3064	19.7082	82.2455	39.8547	44.1594	17.2033	28.941	36.2083	40.2561	47.4354	56.6591	52.3104	36.7085	12.465	19.1318	42.6555	29.3064	29.3727	51.3263	53.2537	67.9927			6.77559e-05	0.708388	0.62433	0.508084	0.357491	0.234168	0.805427	0.770091	0.214544	0.971009	0.443501	0.75873	0.647465	0.757825	1.49826	0.749737	1.54107	0.687305	0.850092
	13.7464	9.86192	14.9584	52.741	31.8633	22.2027	65.785	61.9655	21.4266	79.518	39.4109	42.3462	17.8174	24.07	37.8103	41.9114	50.2059	59.3092	51.6377	32.7431	11.3082	17.6601	41.5529	28.3742	32.1325	49.4709	54.1985	67.1043			7.1893e-05	0.673567	0.538895	0.483061	0.364631	0.257095	0.726652	0.730695	0.233251	0.938808	0.438561	0.727575	0.670575	0.630277	1.56454	0.780565	1.63108	0.719453	0.83916
	14.8345	9.40984	11.8308	51.8746	31.0123	22.7087	52.2156	61.7265	24.8924	71.3232	36.673	39.031	19.0324	20.12	39.4103	44.2587	51.3889	62.8459	52.608	27.6349	11.161	16.377	43.4459	29.4542	30.651	48.7966	51.4491	63.9653			7.75839e-05	0.64269	0.426218	0.475126	0.354892	0.262955	0.576766	0.727877	0.27098	0.842059	0.408095	0.670616	0.716305	0.526847	1.63075	0.824282	1.66951	0.762355	0.854929
	14.4068	8.93872	10.5392	50.3957	28.936	23.264	46.619	65	23.0752	49.0623	38.2089	39.3582	20.2381	18.1756	41.1266	42.6537	49.1603	65.7773	50.9305	25.9198	11.2762	17.3053	43.5346	28.0064	27.9688	47.1423	50.0037	65.6343			7.53472e-05	0.610512	0.379688	0.46158	0.331132	0.269384	0.514947	0.766478	0.251198	0.579241	0.425186	0.676238	0.761682	0.47593	1.70177	0.794389	1.59711	0.797914	0.827668
	12.2609	8.95752	9.36936	46.7334	28.4079	24.3768	49.0491	66.5247	23.4165	36.4343	39.9635	37.9291	21.1373	15.2343	44.134	42.471	41.2047	66.4163	50.9883	23.5595	10.844	18.146	40.7858	22.075	26.4468	45.6007	50.7702	69.4056			6.41239e-05	0.611797	0.337542	0.428037	0.325089	0.28227	0.541789	0.784457	0.254912	0.430152	0.444711	0.651683	0.795522	0.398913	1.82621	0.790987	1.33865	0.805666	0.828608
	11.0193	8.92973	8.02224	45.0236	29.0123	24.8186	49.1475	70.5207	25.3563	33.6429	40.1777	36.6409	23.6509	12.2022	44.4033	45.3693	38.5797	69.6981	51.179	20.4175	10.2135	17.0686	33.2893	16.9921	25.0597	44.1583	48.3247	65.0147			5.76306e-05	0.609899	0.289011	0.412377	0.332005	0.287386	0.542876	0.831578	0.27603	0.397196	0.447094	0.629549	0.890126	0.319517	1.83735	0.844965	1.25337	0.845475	0.831706
	9.66044	8.59118	6.7494	44.512	28.8577	25.5721	44.5734	66.9457	23.7996	32.0948	41.1447	37.5637	27.6008	9.56334	43.899	45.0167	37.7195	72.9822	51.268	19.2109	8.42467	16.5592	29.8923	15.9533	25.4058	43.322	44.2941	64.7727			5.05237e-05	0.586776	0.243155	0.407691	0.330236	0.296111	0.492351	0.789422	0.259083	0.378919	0.457855	0.645406	1.03878	0.250418	1.81649	0.838398	1.22542	0.885313	0.833153
	8.14735	8.43382	5.83139	39.3046	29.2065	27.4891	44.5232	70.9699	17.588	28.2475	37.7164	38.2959	32.5384	9.95833	44.6452	44.1631	36.7005	76.0635	50.5413	19.25	9.26067	16.5361	28.4642	15.8233	20.8299	41.0381	41.9216	64.0238			4.26103e-05	0.576028	0.210082	0.359996	0.334227	0.318309	0.491796	0.836875	0.191463	0.333496	0.419706	0.657985	1.22462	0.260761	1.84736	0.822502	1.19232	0.922691	0.821343
	7.32248	8.67318	5.01874	35.4998	29.568	26.6359	47.6865	77.5799	17.3875	24.6195	38.132	38.7885	38.9034	9.80477	43.9577	45.5179	35.83	74.5047	50.4458	19.8343	9.4375	16.4503	26.9729	15.6607	15.3481	38.3741	36.8401	62.8178			3.82963e-05	0.592377	0.180806	0.325147	0.338364	0.30843	0.526738	0.91482	0.189281	0.290664	0.424329	0.666449	1.46417	0.25674	1.81891	0.847732	1.16404	0.903782	0.81979
	6.60353	8.56764	3.77561	36.6776	26.6423	19.9799	48.3318	78.4235	15.7013	18.2939	39.2321	38.8735	39.1801	9.43445	49.0978	44.7895	33.7262	74.1305	49.2934	18.8016	9.10467	17.2925	24.827	17.3475	11.6575	40.286	32.7463	65.121			3.45362e-05	0.585168	0.136021	0.335935	0.304884	0.231356	0.533866	0.924768	0.170925	0.215982	0.436571	0.667909	1.47458	0.247043	2.0316	0.834167	1.09569	0.899243	0.801064
	6.41788	8.46323	3.24064	33.7647	22.779	21.4248	53.4987	70.0226	13.0196	15.7514	39.4468	39.3588	35.2815	7.72191	53.4785	45.6965	29.5873	69.1646	48.9046	17.856	7.96575	17.2444	23.6795	16.0214	11.4364	41.2722	30.8682	66.6272			3.35653e-05	0.578037	0.116748	0.309255	0.260674	0.248087	0.590939	0.825704	0.141732	0.185965	0.43896	0.676248	1.32785	0.2022	2.21287	0.851059	0.961224	0.839003	0.794746
	6.97343	8.87257	2.94321	31.292	19.8783	20.9557	56.5225	66.014	9.33826	15.1056	40.2566	43.6465	31.7293	6.84888	58.6413	47.3	25.6057	61.5899	48.5635	16.8873	8.39533	16.0054	23.0373	13.0833	9.94676	38.5154	27.8529	66.173			3.64708e-05	0.605994	0.106033	0.286607	0.22748	0.242656	0.624339	0.778435	0.101657	0.17834	0.447973	0.749917	1.19416	0.179339	2.4265	0.880923	0.831871	0.747119	0.789202
	7.11283	8.63398	2.78749	26.9096	18.1663	19.0989	54.0998	62.5226	8.46645	14.1425	38.5891	44.9262	25.5694	5.67856	59.7879	45.7453	20.6352	57.3077	49.3568	15.9341	9.20575	16.4141	24.2974	13.1442	8.62337	36.2942	25.1514	69.7215			3.71998e-05	0.589699	0.100422	0.246468	0.207888	0.221155	0.597579	0.737264	0.0921661	0.16697	0.429417	0.771904	0.962332	0.148694	2.47395	0.851967	0.670393	0.695173	0.802093
	6.47825	8.41274	2.79662	24.3728	17.6027	17.6359	57.5283	57.6184	8.85064	12.101	36.0723	44.2412	17.5438	5.04388	54.4974	43.0026	15.3418	52.6792	49.8739	14.1689	7.683	17.3839	25.4187	12.1007	7.92598	35.2548	22.5043	75.1173			3.3881e-05	0.574588	0.100752	0.223234	0.201438	0.204214	0.635449	0.679435	0.0963484	0.142867	0.40141	0.760134	0.660277	0.132075	2.25504	0.800888	0.49842	0.639028	0.810498
	6.78159	8.06292	2.6768	20.3984	17.243	16.4102	57.9716	56.6053	9.1737	11.2919	38.2865	46.0606	15.9101	4.1062	49.725	41.5438	13.7201	46.6452	47.9915	12.7335	8.71175	18.7232	26.3544	11.29	7.7935	34.438	21.1797	77.314			3.54674e-05	0.550696	0.0964349	0.186831	0.197323	0.190021	0.640345	0.667488	0.0998653	0.133315	0.426049	0.791395	0.598794	0.107522	2.05756	0.773719	0.445735	0.565831	0.779906
	7.05193	7.48283	2.65221	18.0142	17.6601	15.6735	58.9339	44.5066	8.50443	8.44669	41.059	44.3215	16.3959	3.83619	46.0933	37.0649	12.695	40.0151	47.6102	11.2591	8.19633	20.4113	26.0508	10.0707	7.34415	36.0747	21.8039	73.1413			3.68813e-05	0.511076	0.0955491	0.164994	0.202096	0.181491	0.650975	0.52482	0.0925796	0.0997236	0.456902	0.761514	0.617078	0.100451	1.90728	0.690303	0.412433	0.485405	0.773709
	7.0435	6.3755	2.23184	13.222	14.5201	15.654	56.4987	31.3503	8.42405	6.76667	39.5075	43.0347	16.9549	4.1439	43.2526	35.4763	11.1718	33.9869	46.8485	10.6427	7.752	19.7651	22.1814	9.05583	8.15456	33.7961	19.6526	62.5823			3.68372e-05	0.435445	0.0804047	0.121102	0.166162	0.181264	0.624076	0.369682	0.0917046	0.0798889	0.439637	0.739405	0.638114	0.108509	1.78974	0.660716	0.362946	0.41228	0.761331
	6.49276	4.83905	2.02457	10.2525	9.16629	12.3198	49.9011	29.9004	7.18283	5.73231	25.6505	42.4	16.869	4.60477	41.8869	33.4611	8.66063	20.4465	45.4831	9.93308	7.13733	21.6992	19.2432	8.68083	8.04544	29.9219	16.6109	46.946			3.39569e-05	0.330506	0.0729377	0.0939039	0.104895	0.142657	0.5512	0.352584	0.0781926	0.067677	0.285436	0.7285	0.634881	0.120577	1.73323	0.623184	0.281365	0.248028	0.739142
	6.03623	3.49755	2.20844	7.603	8.23494	8.36044	46.4663	25.4622	13.5962	5.21718	17.8316	39.1921	16.1162	7.37778	44.0365	28.3851	6.28745	11.1441	43.1801	9.48295	6.18975	22.6233	18.2791	8.39929	7.1234	27.2998	15.3952	39.3628			3.15693e-05	0.238882	0.0795617	0.0696368	0.0942374	0.0968093	0.51326	0.300249	0.148009	0.0615953	0.198429	0.673383	0.606548	0.193189	1.82218	0.528648	0.204265	0.135184	0.701716
	5.81283	2.10048	2.2342	6.2062	7.36806	5.44356	43.4755	22.1429	14.147	6.02919	13.8565	33.5529	16.3245	8.28237	43.4481	25.7202	3.10417	9.39872	40.715	8.95988	5.68267	16.2866	18.0092	8.06583	6.65714	26.839	15.2855	34.9543			3.04009e-05	0.143463	0.0804897	0.0568433	0.0843171	0.0630335	0.480224	0.261108	0.154004	0.071182	0.154194	0.576493	0.614389	0.216876	1.79783	0.479016	0.100847	0.114012	0.661657
	3.29607	1.30196	2.16744	4.729	7.37332	3.57351	35.7903	18.3102	10.9088	6.56365	12.5839	27.0575	14.6738	6.14888	38.6237	21.7956	1.72645	8.20127	37.3337	9.10423	5.9295	8.75724	17.834	7.75429	6.82728	22.5323	12.9081	32.408			1.72383e-05	0.0889236	0.0780847	0.0433135	0.0843774	0.0413794	0.395335	0.215913	0.118754	0.077492	0.140033	0.464892	0.552262	0.16101	1.5982	0.405925	0.0560885	0.0994858	0.606707
	3.23792	1.26798	2.15691	4.9046	5.49107	3.46784	28.7103	15.5962	6.27469	7.13581	10.6123	22.4047	11.9519	4.11761	35.1763	18.7095	1.7971	7.95178	35.1975	8.66976	5.67467	7.92625	16.2424	7.1025	7.23212	19.7222	11.3205	27.9322			1.69342e-05	0.086603	0.0777054	0.0449218	0.0628377	0.0401557	0.31713	0.18391	0.0683065	0.0842471	0.118092	0.384949	0.44982	0.107821	1.45555	0.348448	0.0583838	0.0964594	0.571991
	3.43891	1.2639	1.98618	4.9634	4.83147	3.26456	24.9977	12.5404	5.76726	5.2308	5.78819	15.2729	6.39036	3.9228	32.5205	17.2877	1.74065	8.13837	32.9354	8.68064	5.23375	4.68583	15.7344	7.34833	6.35844	19.3337	11.9326	23.827			1.79854e-05	0.0863241	0.0715543	0.0454604	0.0552895	0.0378019	0.276121	0.147876	0.0627826	0.0617561	0.0644105	0.262414	0.240508	0.102719	1.34566	0.321969	0.0565498	0.0987228	0.53523
	3.44565	1.17452	1.5006	4.9872	5.35324	3.15049	23.9458	9.89309	6.05951	4.63182	4.42419	10.5575	3.73867	5.6662	25.5897	16.1824	1.68205	7.40878	32.3432	8.802	5.20167	3.66944	14.2934	7.46857	6.75068	18.3109	10.0588	23.4085			1.80206e-05	0.0802195	0.0540609	0.0456784	0.0612603	0.0364809	0.264501	0.116659	0.0659641	0.0546844	0.049232	0.181395	0.140709	0.148371	1.05887	0.301385	0.054646	0.0898725	0.525607
	2.52898	1.07598	1.19261	5.39833	5.57198	2.94053	21.6495	11.6278	6.14051	4.70201	4.29282	8.29527	2.88383	5.04057	17.7453	13.9193	1.609	7.86793	31.5317	9.07701	4.78225	3.8337	12.3239	7.26417	7.28735	14.3051	10.0901	15.48			1.32265e-05	0.0734894	0.0429653	0.049444	0.0637635	0.0340497	0.239137	0.137115	0.0668458	0.0555131	0.0477702	0.142526	0.108536	0.131988	0.734279	0.259236	0.0522728	0.0954423	0.51242
	1.82299	1.07598	1.0919	6.8398	3.4122	2.40837	20.2579	13.0056	6.28762	4.7803	4.27084	5.11913	2.61329	3.8481	11.5413	16.0789	1.50213	7.46752	30.2468	9.39315	4.382	4.70199	10.6809	6.80571	7.47274	12.9687	9.82842	14.1233			9.53414e-06	0.0734894	0.039337	0.0626465	0.0390479	0.0278877	0.223766	0.153362	0.0684473	0.0564374	0.0475256	0.0879549	0.0983536	0.100763	0.477566	0.299457	0.048801	0.090585	0.491539
	1.5459	0.937117	1.15319	8.0542	1.84987	2.12622	16.5253	15.5477	8.08858	5.37488	4.30152	4.14735	2.35998	3.28555	9.76763	16.5526	1.3587	7.48427	24.6347	8.70948	4.1935	3.6333	10.0465	3.86	7.17276	11.003	10.4994	12.4322			8.085e-06	0.0640049	0.0415449	0.0737694	0.0211692	0.0246205	0.182536	0.183338	0.0880526	0.0634571	0.047867	0.0712581	0.0888203	0.0860328	0.404172	0.308279	0.0441411	0.0907882	0.400337
	1.2379	0.64706	1.12411	5.19717	1.19531	2.45351	11.0609	16.4868	8.28671	6.84747	2.62559	3.38596	1.84427	2.50951	7.6718	14.0482	1.33998	5.81636	15.983	7.7135	3.83333	2.17187	10.4438	2.53833	5.26947	7.83791	10.3493	10.512			6.47417e-06	0.0441941	0.0404975	0.0476015	0.0136787	0.0284104	0.122177	0.194412	0.0902095	0.0808428	0.0292173	0.0581762	0.069411	0.0657121	0.317449	0.261637	0.0435331	0.0705556	0.259739
	0.731886	0.2729	1.1171	3.9492	1.51507	2.67901	6.08994	6.87829	5.61956	7.62234	1.7905	2.69765	1.1035	1.22388	5.11472	14.15	0.96075	3.16982	8.87712	7.37458	2.5465	1.74218	7.375	1.41857	2.04024	4.93061	7.58396	5.7445			3.82773e-06	0.018639	0.0402448	0.0361712	0.0173379	0.0310215	0.0672686	0.0811086	0.0611747	0.0899912	0.0199245	0.04635	0.0415313	0.0320476	0.211641	0.263532	0.0312126	0.0384516	0.144261
	0.236733	0.0449167	0.422143	1.3444	1.03851	1.29551	1.68121	1.72744	1.82278	5.80607	0.307287	1.53618	0.346186	0.387629	1.4048	8.98157	0.389183	0.872117	2.9534	6.8375	0.645333	0.642286	1.85839	0.42	0.45456	1.11862	2.50001	2.06133			1.23811e-06	0.0030678	0.0152082	0.0123135	0.0118843	0.0150013	0.0185704	0.02037	0.0198429	0.0685478	0.00341947	0.026394	0.013029	0.0101501	0.0581289	0.167274	0.0126437	0.0105792	0.0479955
[truncated: 11 more columns]
