# Supplementary material for: SlitC-PlexinA1 mediates iterative inhibition for orderly passage of spinal commissural axons through the floor plate
Source: eLife. 2020 Dec 21;9:e63205. doi: 10.7554/eLife.63205 (PMC7775108; doi:10.7554/eLife.63205)
Supplement: Figure 3—source data 4. [file elife-63205-fig3-data4.xlsx]

## Sheet: Figure 3I
PlxnA1
	Embryo 1				Embryo 2
Time	GC03	GC04	GC05	GC06	GC01	GC02	GC04	GC05	GC06	GC07	Mean	SEM
-12	0.956906	1.07778	1.02123	1.03228	1.06263	1.07775	1.02033	1.02016	1.0549	1.0202	1.03442	0.011433
-9	0.982434	0.995168	1.00141	0.992535	1.00342	1.01262	1.00081	0.998545	0.986704	0.983223	0.995686	0.00304667
-6	1.02815	0.98117	0.976606	0.991842	0.97824	0.96346	0.989475	0.990437	0.980437	0.96992	0.984974	0.00557924
-3	1.03251	0.945879	1.00076	0.983347	0.95571	0.946174	0.989383	0.99086	0.977958	1.02666	0.984923	0.00956979
0	0	0	0	0	0	0	0	0	0	0	0	0
3	0.0156114	0.0734415	-0.0145171	-0.0221558	0.0148547	0.0558956	0.0141305	0.0147171	0.0168947	0.0515732	0.0220446	0.00953696
6	0.018575	0.118912	-0.0372591	-0.0329391	0.0238342	0.070729	0.0183449	0.0233779	0.0229729	0.0841015	0.0310649	0.0154065
9	0.0270391	0.120913	-0.0315269	-0.018565	0.0201472	0.0735429	0.0204961	0.0276662	0.0125174	0.0841621	0.0336392	0.0147625
12	0.0455189	0.130628	-0.0175725	-0.0113577	0.0203714	0.0597917	0.0180041	0.0239204	0.0232233	0.122584	0.0415112	0.0159145
15	0.0519069	0.111666	-0.0336893	-0.0287841	0.013857	0.102886	0.0271693	0.0297827	0.0188789	0.113025	0.0406698	0.0170361
18	0.038249	0.156555	-0.0367876	-0.0182755	0.0190165	0.0709314	0.0296186	0.0401846	0.0190819	0.078556	0.039713	0.0170973
21	0.0485197	0.150666	-0.0470178	-0.0221397	0.0100353	0.0948412	0.0328225	0.0323701	0.0205435	0.117777	0.0438418	0.0194503
24	0.0459819	0.145351	-0.0253173	-0.0246542	0.00855952	0.0366772	0.0307151	0.0403451	0.0228979	0.111532	0.0392088	0.0170196
27	0.0359615	0.14265	-0.0324953	-0.0362633	0.00760121	0.0501475	0.0305149	0.038707	0.0151659	0.128482	0.0380471	0.0186419
30	0.0534889	0.148533	-0.0250696	-0.0250758	0.000899511	0.0653955	0.0331113	0.0400786	0.0175151	0.119541	0.0428417	0.0180748		30sec	280sec	580sec
40	0.0560687	0.138748	-0.0423999	-0.0188959	0.0122677	0.052766	0.0394468	0.0503261	0.0332128	0.145542	0.0467082	0.0188685		0.0534889	0.123231	0.273283
50	0.0637459	0.138018	-0.0154566	-0.0441273	0.00768032	0.0578954	0.0327867	0.041394	0.0286175	0.13243	0.0442984	0.0183276		0.148533	0.261269	0.426462
60	0.0630536	0.13922	-0.00429635	-0.0134774	0.0115049	0.0654823	0.0312759	0.0413746	0.0303505	0.152482	0.051697	0.0176744		-0.0250696	0.130885	0.275942
70	0.063589	0.151341	0.0172309	-0.0148676	0.0102137	0.0347413	0.0312016	0.0410235	0.0413897	0.165164	0.0541027	0.0186054		-0.0250758	0.0527682	0.183886
80	0.0812384	0.175807	0.0133598	-0.018747	0.00347437	0.098892	0.0454702	0.0506723	0.0388817	0.149998	0.0639046	0.0198991		0.000899511	0.0135	0.0440173
90	0.0634799	0.168381	0.0181152	-0.00118687	0.0049094	0.0911312	0.0473773	0.0601097	0.0493372	0.166433	0.0668086	0.0189731		0.0653955	0.15777	0.187781
100	0.0822219	0.175823	0.0276165	0.0058271	0.00774117	0.0617561	0.0426516	0.049724	0.0621074	0.189815	0.0705284	0.0202157		0.0331113	0.0800735	0.153274
110	0.0866895	0.161487	0.0132129	0.00712248	0.000893521	0.0704027	0.0440351	0.0482448	0.0577909	0.182111	0.067199	0.0195475		0.0400786	0.0849719	0.159947
120	0.085951	0.188881	0.0179299	0.0162744	0.00225871	0.111103	0.0615273	0.0670782	0.0500554	0.189716	0.0790774	0.0211474		0.0175151	0.121649	0.214736
130	0.0847011	0.185402	0.0451962	0.00467211	0.00604412	0.0856559	0.0494224	0.0597641	0.0640587	0.189759	0.0774676	0.0203033		0.119541	0.216115	0.342119
160	0.0908879	0.172044	0.0359992	0.00283929	0.00722472	0.0685524	0.0631483	0.0685637	0.0777381	0.18071	0.0767708	0.0189637
190	0.0887786	0.221564	0.0672045	0.0268088	-0.000402274	0.10105	0.0649003	0.0714038	0.0783456	0.192839	0.0912492	0.0215484
220	0.0976429	0.223334	0.0903591	0.0311328	-0.00141012	0.109172	0.0677962	0.0725541	0.0954881	0.183595	0.0969665	0.0208506
250	0.110475	0.270748	0.0936151	0.0396669	0.00693918	0.122461	0.077787	0.0852294	0.0914537	0.167229	0.10656	0.0228483
280	0.123231	0.261269	0.130885	0.0527682	0.0135	0.15777	0.0800735	0.0849719	0.121649	0.216115	0.124223	0.0233947
310	0.123985	0.279479	0.133141	0.0810257	0.00973647	0.138253	0.0902253	0.0952326	0.128637	0.207649	0.128736	0.0231243
340	0.150831	0.255519	0.138633	0.100742	0.00901695	0.168678	0.101944	0.106001	0.115867	0.237321	0.138455	0.0225137
370	0.144681	0.293559	0.161597	0.110877	0.022394	0.144535	0.106259	0.108431	0.150906	0.258032	0.150127	0.0244787
400	0.143577	0.306399	0.157498	0.132337	0.0279719	0.111468	0.112024	0.113014	0.166498	0.293543	0.156433	0.0267745
430	0.189836	0.302965	0.196485	0.148546	0.0315461	0.126016	0.117948	0.127837	0.169824	0.334632	0.174563	0.0282295
460	0.212831	0.344131	0.205907	0.148434	0.0410044	0.122488	0.128812	0.139693	0.188297	0.347493	0.187909	0.0305603
490	0.216712	0.362519	0.226814	0.160346	0.0473079	0.14183	0.127376	0.140928	0.199271	0.351753	0.197486	0.0311648
520	0.208859	0.350031	0.246434	0.164571	0.0380873	0.147131	0.140586	0.150295	0.209659	0.347634	0.200329	0.0303495
550	0.247944	0.372574	0.246676	0.178804	0.0487574	0.160466	0.141704	0.147628	0.204956	0.362046	0.211156	0.03168
580	0.273283	0.426462	0.275942	0.183886	0.0440173	0.187781	0.153274	0.159947	0.214736	0.342119	0.226145	0.0340798
610	0.296009	0.42622	0.280157	0.194884	0.0515489	0.214984	0.169334	0.176459	0.222896	0.343813	0.237631	0.0329389
640	0.291353	0.39228	0.279069	0.211839	0.0486993	0.198548	0.177313	0.186058	0.247737	0.336625	0.236952	0.0302953
670	0.301572	0.412564	0.290261	0.224704	0.0479468	0.182132	0.169921	0.188702	0.247328	0.381618	0.244675	0.0339928
700	0.352386	0.44685	0.280338	0.236556	0.0424829	0.222096	0.174565	0.197647	0.281189	0.353591	0.25877	0.0355187
730	0.377856	0.44172	0.303906	0.245913	0.0623045	0.23955	0.180759	0.195755	0.29571	0.392929	0.27364	0.0359059
PlxnA1 Y1815F
	Embryo 1									Embryo 2
Time	GC01	GC02	GC03	GC04.1	GC04.2	GC05	GC06	GC07	GC09	GC01.1	GC01.2	GC02	GC03	GC05	GC06	Mean	SEM
-12	1.05124	0.991937	1.04524	1.01725	0.997277	1.04491	1.02276	1.07346	1.03245	1.04241	1.03847	1.01128	1.00202	1.01982	0.994875	1.02569	0.00615431
-9	0.996493	1.03375	1.01516	1.03068	0.996684	0.986858	0.988138	0.988998	1.01705	1.01761	1.02347	1.05541	1.02263	1.03046	1.00474	1.01388	0.00514742
-6	0.968422	0.997445	0.982365	0.981475	0.991468	1.0111	1.02359	0.971031	0.969563	0.970152	0.97599	0.965427	1.00408	0.978732	1.00007	0.986061	0.00457385
-3	0.983841	0.976869	0.95723	0.970595	1.01457	0.957132	0.965514	0.96651	0.980934	0.969829	0.96207	0.967886	0.97127	0.97099	1.00031	0.97437	0.00402873
0	0	0	0	0	0	0	0	0	0	0	0	0	0	0	0	0	0
3	0.0355163	0.190521	0.0195896	0.135384	0.166638	0.198742	0.0813625	0.0725468	0.115994	0.0300321	0.0332955	0.00329653	0.0462754	0.0155951	0.0149516	0.0773161	0.0174355
6	0.0678714	0.236647	0.0418087	0.226055	0.252382	0.237457	0.0656128	0.0806635	0.161293	0.0300773	0.00548942	0.0224286	0.035576	0.0151617	0.0182621	0.0997858	0.0243267
9	0.0631711	0.29774	0.0409234	0.208541	0.259482	0.22046	0.0995818	0.0479195	0.187349	0.0432046	0.0318796	0.0409083	0.0478627	0.0160184	0.0195863	0.108308	0.0251259
12	0.0622815	0.293118	0.0399098	0.281581	0.250504	0.239253	0.083429	0.0705642	0.204826	0.0417677	0.0330181	0.0450996	0.0480147	0.0440424	0.0229034	0.117354	0.0265136		30sec	280sec	580sec
15	0.0637301	0.28691	0.0526623	0.239564	0.279757	0.241408	0.102781	0.0496916	0.174956	0.0420031	0.0417068	0.0249288	0.0482985	0.0353731	0.026522	0.11402	0.0258322		0.079164	0.15875	0.183324
18	0.0764	0.257475	0.0508034	0.261634	0.293145	0.224002	0.100289	0.0710666	0.187742	0.0560913	0.0383085	0.0347664	0.0366298	0.0557663	0.027577	0.118113	0.0250146		0.259793	0.281569	0.431215
21	0.0625544	0.281036	0.0557366	0.257155	0.242543	0.233566	0.103382	0.0658638	0.189539	0.0582914	0.0416262	0.0573774	0.0559791	0.0525138	0.026215	0.118892	0.023848		0.0654429	0.180607	0.328366
24	0.0710214	0.279819	0.053864	0.247772	0.278988	0.246746	0.123464	0.0574881	0.196801	0.0566113	0.0386993	0.0486717	0.050673	0.0662925	0.0268318	0.122916	0.0250485		0.234109	0.251545	0.29862
27	0.0719989	0.276466	0.0617934	0.276014	0.290518	0.26137	0.103495	0.0410209	0.203123	0.0672175	0.0451472	0.0586057	0.0372656	0.0584299	0.0335447	0.125734	0.0264369		0.290372	0.385128	0.439764
30	0.079164	0.259793	0.0654429	0.234109	0.290372	0.258553	0.0947785	0.0434561	0.205327	0.063665	0.0616265	0.0388961	0.0501562	0.0501354	0.0306328	0.12174	0.0248869		0.258553	0.376107	0.376298
40	0.0753966	0.265518	0.0628904	0.312855	0.325525	0.231415	0.123074	0.0764004	0.230141	0.0794529	0.0413555	0.0599264	0.044666	0.0905971	0.0306968	0.136661	0.0270892		0.0947785	0.270119	0.365309
50	0.0890533	0.275638	0.0732204	0.277113	0.306236	0.282116	0.0982959	0.0553888	0.235806	0.0833139	0.0593462	0.0442368	0.0822453	0.0869258	0.0343369	0.138885	0.0263988		0.0434561	0.137076	0.269589
60	0.0874	0.283557	0.0687155	0.27596	0.296294	0.285363	0.146229	0.0754531	0.231467	0.0879845	0.0601846	0.0762055	0.0588841	0.0970111	0.0375629	0.144551	0.0255257		0.205327	0.265492	0.317481
70	0.086752	0.272717	0.0740729	0.296884	0.29696	0.36694	0.161721	0.0707636	0.238895	0.0966105	0.0660325	0.0597448	0.093275	0.115204	0.0356243	0.15548	0.0279868		0.063665	0.197685	0.280633
80	0.0931253	0.266	0.0747082	0.247025	0.251837	0.274371	0.14641	0.101357	0.2263	0.104654	0.0960576	0.0710615	0.0872442	0.138186	0.0385485	0.147792	0.0210935		0.0616265	0.155131	0.31938
90	0.111462	0.260178	0.065749	0.261322	0.282783	0.289059	0.133118	0.0963873	0.199659	0.112355	0.0843529	0.0592944	0.144349	0.131741	0.0433549	0.151678	0.0219696		0.0388961	0.16325	0.220283
100	0.107791	0.269255	0.0759954	0.271917	0.302657	0.290107	0.168813	0.0831795	0.228482	0.116478	0.0812146	0.0948648	0.0816809	0.162542	0.0435955	0.158572	0.0233193		0.0501562	0.191607	0.322829
110	0.122927	0.241583	0.0846435	0.213217	0.32118	0.294033	0.140265	0.0742408	0.218395	0.115934	0.101418	0.0677829	0.0927547	0.153587	0.0473244	0.152619	0.0220344		0.0501354	0.262558	0.326378
120	0.111874	0.241733	0.0756104	0.17201	0.283892	0.314495	0.175544	0.0760158	0.217866	0.124895	0.0763991	0.100693	0.107111	0.13527	0.0502486	0.15091	0.0209395		0.0306328	0.0854846	0.161706
130	0.107202	0.232813	0.0947216	0.174465	0.309374	0.417241	0.188423	0.0901658	0.226218	0.129654	0.0991975	0.0929789	0.137547	0.162811	0.0556213	0.167895	0.0249472
160	0.11157	0.222644	0.107383	0.147686	0.294466	0.371808	0.191282	0.0813611	0.21623	0.134027	0.0965978	0.10056	0.0892481	0.152193	0.0540676	0.158075	0.022564
190	0.127212	0.260538	0.102507	0.219664	0.358761	0.385552	0.238384	0.0952212	0.210905	0.152065	0.101253	0.108261	0.139861	0.195616	0.066367	0.184145	0.0248086
220	0.134461	0.234098	0.138251	0.272298	0.380308	0.392568	0.220932	0.12098	0.233936	0.165506	0.134427	0.152225	0.167912	0.241908	0.0667802	0.203773	0.0239063
250	0.147047	0.293546	0.149238	0.24995	0.352113	0.417555	0.224141	0.135641	0.283139	0.190403	0.154249	0.131839	0.174623	0.236334	0.0813023	0.214741	0.0237404
280	0.15875	0.281569	0.180607	0.251545	0.385128	0.376107	0.270119	0.137076	0.265492	0.197685	0.155131	0.16325	0.191607	0.262558	0.0854846	0.224141	0.0219918
310	0.132643	0.31126	0.191021	0.320039	0.456674	0.419796	0.27636	0.147293	0.290084	0.205028	0.188849	0.173445	0.172497	0.257548	0.0960084	0.24257	0.0268041
340	0.156373	0.330968	0.208465	0.327364	0.450134	0.413827	0.240386	0.194525	0.254708	0.218731	0.214504	0.180227	0.216429	0.270256	0.097536	0.251629	0.0243942
370	0.158725	0.339924	0.238743	0.204546	0.46842	0.3648	0.258127	0.232042	0.2778	0.230164	0.229796	0.200511	0.19845	0.30338	0.111633	0.254471	0.0227053
400	0.177397	0.269537	0.27588	0.296632	0.515223	0.383944	0.279697	0.200667	0.277533	0.24879	0.241037	0.197854	0.214799	0.279577	0.114123	0.264846	0.0239967
430	0.159797	0.265839	0.279032	0.282876	0.428164	0.449266	0.301291	0.201164	0.262592	0.247413	0.266789	0.225357	0.237209	0.287871	0.124658	0.267955	0.0218549
460	0.179264	0.348284	0.305102	0.31699	0.409854	0.404004	0.322315	0.238148	0.272798	0.249707	0.256944	0.175671	0.275834	0.288534	0.134377	0.278522	0.0202648
490	0.170697	0.299141	0.305342	0.315965	0.476206	0.413214	0.291077	0.29097	0.261566	0.263038	0.30391	0.205971	0.261881	0.280225	0.140103	0.285287	0.0214803
520	0.169364	0.349755	0.325866	0.324019	0.457127	0.451336	0.34339	0.253884	0.286691	0.24737	0.264806	0.240907	0.291062	0.282795	0.153785	0.296144	0.0219954
550	0.197358	0.322149	0.341261	0.339456	0.470847	0.402021	0.349748	0.255673	0.278333	0.266419	0.285516	0.212978	0.312493	0.304987	0.157019	0.299751	0.0205084
580	0.183324	0.431215	0.328366	0.29862	0.439764	0.376298	0.365309	0.269589	0.317481	0.280633	0.31938	0.220283	0.322829	0.326378	0.161706	0.309412	0.0205411
610	0.194379	0.391863	0.353109	0.346837	0.546346	0.459799	0.440676	0.268862	0.333523	0.282767	0.329255	0.204891	0.336882	0.310625	0.169735	0.331303	0.0264266
640	0.189518	0.324147	0.361687	0.290671	0.480631	0.405013	0.469721	0.260644	0.340517	0.271168	0.327366	0.273861	0.327985	0.339344	0.17549	0.322518	0.022342
670	0.189021	0.353724	0.338033	0.323381	0.54995	0.367666	0.428514	0.317579	0.346742	0.261333	0.323275	0.259204	0.355351	0.360494	0.175166	0.329962	0.0234826
700	0.183299	0.335579	0.355013	0.295281	0.515678	0.411345	0.438699	0.329614	0.301796	0.254533	0.313829	0.286962	0.344827	0.393861	0.186341	0.329777	0.0228694
730	0.193496	0.327995	0.400694	0.331947	0.504797	0.425281	0.425381	0.330781	0.29529	0.258119	0.331225	0.27078	0.389094	0.363532	0.192455	0.336058	0.0223856
	PlxnA1		PlxnA1 Y1815F
Time	Mean	SEM	Mean	SEM
-12	1.03442	0.011433	1.02569	0.00615431
-9	0.995686	0.00304667	1.01388	0.00514742
-6	0.984974	0.00557924	0.986061	0.00457385
-3	0.984923	0.00956979	0.97437	0.00402873
0	0	0	0	0
3	0.0220446	0.00953696	0.0773161	0.0174355
6	0.0310649	0.0154065	0.0997858	0.0243267
9	0.0336392	0.0147625	0.108308	0.0251259
12	0.0415112	0.0159145	0.117354	0.0265136
15	0.0406698	0.0170361	0.11402	0.0258322
18	0.039713	0.0170973	0.118113	0.0250146
21	0.0438418	0.0194503	0.118892	0.023848
24	0.0392088	0.0170196	0.122916	0.0250485
27	0.0380471	0.0186419	0.125734	0.0264369
30	0.0428417	0.0180748	0.12174	0.0248869	t-test	p-value: 0.017373748294938
40	0.0467082	0.0188685	0.136661	0.0270892
50	0.0442984	0.0183276	0.138885	0.0263988
60	0.051697	0.0176744	0.144551	0.0255257
70	0.0541027	0.0186054	0.15548	0.0279868
80	0.0639046	0.0198991	0.147792	0.0210935
90	0.0668086	0.0189731	0.151678	0.0219696
100	0.0705284	0.0202157	0.158572	0.0233193
110	0.067199	0.0195475	0.152619	0.0220344
120	0.0790774	0.0211474	0.15091	0.0209395
130	0.0774676	0.0203033	0.167895	0.0249472
160	0.0767708	0.0189637	0.158075	0.022564
190	0.0912492	0.0215484	0.184145	0.0248086
220	0.0969665	0.0208506	0.203773	0.0239063
250	0.10656	0.0228483	0.214741	0.0237404
280	0.124223	0.0233947	0.224141	0.0219918	t-test	p-value: 0.0052237875469257
310	0.128736	0.0231243	0.24257	0.0268041
340	0.138455	0.0225137	0.251629	0.0243942
370	0.150127	0.0244787	0.254471	0.0227053
400	0.156433	0.0267745	0.264846	0.0239967
430	0.174563	0.0282295	0.267955	0.0218549
460	0.187909	0.0305603	0.278522	0.0202648
490	0.197486	0.0311648	0.285287	0.0214803
520	0.200329	0.0303495	0.296144	0.0219954
550	0.211156	0.03168	0.299751	0.0205084
580	0.226145	0.0340798	0.309412	0.0205411	t-test	p-value: 0.053314436206292
610	0.237631	0.0329389	0.331303	0.0264266
640	0.236952	0.0302953	0.322518	0.022342
670	0.244675	0.0339928	0.329962	0.0234826
700	0.25877	0.0355187	0.329777	0.0228694
730	0.27364	0.0359059	0.336058	0.0223856
