# Supplementary material for: SlitC-PlexinA1 mediates iterative inhibition for orderly passage of spinal commissural axons through the floor plate
Source: eLife. 2020 Dec 21;9:e63205. doi: 10.7554/eLife.63205 (PMC7775108; doi:10.7554/eLife.63205)
Supplement: Figure 5—source data 1. [file elife-63205-fig5-data1.xlsx]

## Sheet: Figure 5A
Left-right analysis
# embryo	Left									Right
blockA	0.400167	0.449468	0.575757	0.630064	0.751672	0.896056	1	0.866217	0.710767	0.563894
blockA	0.74072	0.836901	0.879707	1.10465	1.17536	1.1321	1.1427	1.03147	1.00651	0.94988
blockA	0.594164	0.687202	0.760025	0.821675	1.28109	1.5138	1.43765	1.17735	0.926023	0.801023
blockA	0.800109	0.869697	0.862835	1.0358	1.09211	1.1505	1.16225	1.04638	1.02517	0.955147
blockA	0.714478	0.834709	1.02752	1.11365	1.17799	1.28452	1.12559	0.988106	0.869623	0.863809
blockA	0.577127	0.688118	0.725802	0.931382	1.28837	1.35427	1.37141	1.31244	0.966	0.785072
blockA	0.668486	0.628628	0.729573	0.795161	1.14654	1.46551	1.36569	1.17147	1.05106	0.977895
blockA	0.700762	0.899531	1.08079	1.10684	1.28817	1.29262	1.04349	0.972636	0.891271	0.723894
blockB	0.729687	0.807586	0.900881	1.08389	1.27011	1.39912	1.36607	1.01416	0.780222	0.648267
blockB	0.818956	0.908258	1.03495	1.13543	1.17574	1.09325	1.24667	0.93049	0.865948	0.790303
blockB	0.936467	0.881659	0.942409	1.05213	1.23967	1.18093	1.08154	1.0063	0.83588	0.843027
blockB	0.921961	0.966317	1.07866	1.16753	1.28974	1.14968	0.916932	0.772142	0.796687	0.940356
blockB	0.871102	0.905401	0.977661	1.08741	1.21975	1.17867	1.04341	0.978262	0.917372	0.820966
blockB	0.66661	0.756779	0.786	1.01746	1.21875	1.34356	1.1765	1.14282	1.01393	0.87759
blockB	0.876313	0.841656	0.963449	0.974017	1.10466	1.23408	1.19416	1.07045	0.897687	0.843531
blockB	0.816002	0.881327	1.03638	1.18229	1.13384	1.30594	1.17772	0.86465	0.849338	0.7525
blockB	0.891483	0.967631	0.955202	1.15118	1.2437	1.21725	1.03942	0.911257	0.819624	0.803252
blockB	0.698071	0.680112	0.714567	0.907619	1.47216	1.79882	1.1995	0.876416	0.955769	0.696973
blockB	0.843293	0.901066	0.984949	1.0305	1.09393	1.27704	1.15476	1.00436	0.909904	0.800208
blockB	0.859101	0.882836	1.0316	1.06487	1.10469	1.18177	1.09441	1.04421	0.9065	0.830018
blockB	0.715501	0.798695	0.915839	1.09006	1.12881	1.25468	1.18449	1.15167	0.963169	0.79709
blockB	0.660357	0.765837	1.00785	1.28572	1.17817	1.10037	1.16194	1.03842	0.908541	0.8928
blockB	0.633246	0.777034	0.912755	1.02328	1.1994	1.24321	1.24286	1.08734	0.961729	0.919137
blockB	0.73762	0.83682	0.966097	1.12513	1.24248	1.22422	1.14073	1.03853	0.896941	0.791425
blockB	0.770275	0.932356	1.00134	1.11923	1.22123	1.32084	1.21191	1.00695	0.782129	0.633745
blockB	0.707857	0.812174	0.959092	1.07689	1.12394	1.41868	1.40769	1.05207	0.767902	0.673707
E19	0.738241	0.818504	0.960574	1.14129	1.53748	1.35949	0.98285	0.930229	0.763777	0.767567
E19	0.795316	0.866617	0.965918	1.08559	1.19928	1.25154	1.104	0.972263	0.918979	0.840498
E19	0.884342	0.959576	1.06224	1.12065	1.30947	1.04465	1.03634	0.897803	0.878702	0.806224
E19	0.772205	0.90665	0.996505	1.11982	1.29457	1.1455	1.12559	0.948683	0.894712	0.795769
E19	0.816431	0.890834	0.961075	1.00482	1.13554	1.24832	1.17042	1.02389	0.879408	0.869269
E19	0.883061	0.91265	0.973823	1.01489	1.10529	1.20597	1.01237	0.967526	0.958876	0.965551
E19	0.90941	1.02358	1.07184	1.08954	1.07026	1.04515	1.06741	0.984943	0.894508	0.843369
E19	0.809322	0.813107	0.898126	1.07213	1.30739	1.15842	1.13439	1.00278	0.925898	0.878439
E19	0.921438	0.96351	0.989837	1.08655	1.09371	1.08422	1.02428	0.956835	0.938398	0.941224
E19	0.956231	0.901589	0.995597	1.11054	1.08367	1.09241	1.07229	0.994882	0.918945	0.87385
E19	0.805586	1.0493	1.1232	1.22602	1.16065	1.06754	1.05377	0.865921	0.797394	0.850615
E19	0.930001	0.901533	1.01834	1.14403	1.14042	1.07534	1.01154	0.966678	0.901242	0.910869
E23	0.862836	0.788642	0.970264	1.10226	1.2038	1.15399	1.09269	1.00861	0.961498	0.855399
E23	0.724985	0.696686	0.794041	0.951308	1.00878	1.12434	1.3031	1.23389	1.29339	0.869479
E23	0.870653	0.791963	0.831267	0.981204	1.07772	1.1869	1.17582	1.16681	1.08936	0.828304
E23	0.742838	0.890033	0.936207	1.08283	1.13259	1.2776	1.16379	1.05761	0.885791	0.830704
E23	0.972806	1.04749	1.19218	1.26399	1.21633	0.937881	0.911986	0.964737	0.830229	0.662379
E23	0.713184	0.801038	0.90264	1.18589	1.23344	1.26606	1.13131	1.051	0.909054	0.806379
E23	0.867917	0.904024	1.1028	1.11227	1.21034	1.21018	1.00335	0.928063	0.860058	0.800997
E23	0.833244	0.877608	1.09538	1.09073	1.2329	1.2325	1.01983	0.938721	0.871512	0.80758
E23	0.784174	0.908783	1.02857	1.03471	1.14353	1.29324	1.14564	0.925841	0.905691	0.829829
E23	0.917256	0.892587	1.00152	1.04184	1.23033	1.39272	1.15693	0.894847	0.808496	0.663471
E23	0.874529	0.898501	0.886689	0.958239	1.04491	1.17044	1.25107	1.11533	0.91371	0.886581
E23	1.01848	0.950199	1.04932	1.11639	1.10111	1.14271	0.998862	0.916184	0.866714	0.840034
E28	1.9035	2.17694	2.48516	2.67471	2.23679	2.38488	2.79746	2.81616	2.57279	2.43124
E28	0.954915	1.02493	0.988694	1.0866	1.0037	1.12014	1.08354	0.965685	0.918745	0.853051
E28	0.905812	0.888813	0.971146	0.981098	1.22393	1.2755	1.11224	0.984458	0.900511	0.756496
E28	0.895892	0.91925	0.947106	1.00504	0.977005	1.13301	1.1866	1.01674	0.98276	0.936589
E28	0.832985	0.795766	0.921555	1.01621	1.30483	1.45253	1.16426	0.957472	0.759338	0.795057
Mean per embryo
Block A	0.649502	0.736782	0.830251	0.942403	1.15016	1.26117	1.2061	1.07076	0.930803	0.827577
Block B	0.786328	0.850197	0.953871	1.08748	1.20338	1.27345	1.16893	0.999471	0.879404	0.797494
E19	0.851799	0.917288	1.00142	1.10132	1.20314	1.14821	1.06627	0.959369	0.889237	0.861937
E23	0.848575	0.870629	0.982574	1.0768	1.15298	1.19905	1.11286	1.0168	0.932959	0.806761
E28	1.09862	1.16114	1.26273	1.35273	1.34925	1.47321	1.46882	1.3481	1.22683	1.15449
Mean	0.846965	0.907207	1.00617	1.11215	1.21178	1.27102	1.2046	1.0789	0.971846	0.889651
SD	0.10324	0.105605	0.102625	0.096234	0.0549866	0.0818502	0.10629	0.107681	0.101993	0.105934
NB	5	5	5	5	5	5	5	5	5	5
SEM	0.0461703	0.0472281	0.0458953	0.0430372	0.0245908	0.0366045	0.0475345	0.0481563	0.0456126	0.0473752
						Observed distribution		0.846965	0.907207	1.00617	1.11215	1.21178	1.27102	1.2046	1.0789	0.971846	0.889651
						Theoritical distribution		1.05003	1.05003	1.05003	1.05003	1.05003	1.05003	1.05003	1.05003	1.05003	1.05003
						KS test
						p-value	0.1641
Dorso-ventral analysis
# embryo	Dorsal									Ventral
blockA	0.628358	0.820738	0.999999	0.577257	0.191091	0.130464	0.0975036	0.0364698	0.00375183	0.075821
blockA	0.350355	0.527536	0.455464	0.637918	0.782435	0.703725	0.90251	1.04211	1.00004	0.86007
blockA	0.4253	0.684579	0.848872	1	0.642133	0.684974	0.58126	0.551966	0.556924	0.562794
blockA	0.565754	0.748184	0.60228	0.559412	0.640711	0.755036	0.843259	0.900795	1	0.948624
blockA	0.097583	0.184222	0.147084	0.178152	0.171701	0.304509	0.303397	0.275265	0.324842	0.509432
blockA	0.074921	0.375174	0.285533	0.21799	0.557086	0.685792	0.693673	0.794358	1	0.871376
blockA	0.163529	0.392083	0.390911	0.469086	0.537132	0.512011	0.574659	0.613907	0.750549	1.00004
blockA	0.654716	0.619966	0.650787	0.560969	0.5602	0.276159	0.189626	0.0497184	0.410249	0.936607
blockB	0.232675	0.1885	0.140835	0.237015	0.622091	0.922123	1	0.855819	0.865718	0.703481
blockB	0.501188	0.959885	0.757312	0.771976	1.00002	0.80529	0.683475	0.63571	0.664789	0.0810805
blockB	0.661492	0.409269	0.512918	0.627454	0.832229	0.898413	1.00002	0.783525	0.691324	0.794673
blockB	0.895492	0.885891	0.952064	1.00017	0.988281	0.938399	0.981524	0.986376	0.96738	0.907855
blockB	0.321731	0.447472	0.718341	0.880192	0.828143	1.00002	0.843489	0.788078	0.849238	0.536904
blockB	0.869933	1.00001	0.643125	0.688291	0.758599	0.812392	0.817319	0.809984	0.87374	0.823371
blockB	1.00001	0.902669	0.476551	0.469415	0.529513	0.58515	0.49983	0.407794	0.283056	0.128547
blockB	0.540511	0.811824	1.00001	0.655763	0.862484	0.787281	0.897363	0.60883	0.661951	0.60063
blockB	0.627415	0.575667	0.553847	0.623881	0.862419	1.00004	0.982841	0.870658	0.761487	0.756161
blockB	0.571452	1.50714	1.00003	0.745538	0.970329	0.988641	0.747513	0.74301	0.867413	0.96036
blockB	0.825628	0.875457	0.713253	0.801056	0.770567	1.00001	0.857748	0.734977	0.801512	0.699318
blockB	0.231931	0.373115	0.187308	0.162277	0.263644	0.340191	0.323785	0.303765	0.319989	0.290347
blockB	0.686901	0.657657	0.603307	0.612038	0.662223	0.797649	0.748949	0.772236	0.825967	1.00001
blockB	0.615782	1	0.813881	0.657708	0.527913	0.558771	0.745328	0.805059	0.791198	0.769986
blockB	1.00002	0.834493	0.786142	0.742199	0.868247	0.710563	0.621612	0.574741	0.492208	0.28976
blockB	1.00002	0.697768	0.555708	0.779759	0.679487	0.742946	0.723552	0.641384	0.535132	0.359159
blockB	1.00001	0.907034	0.888984	0.790036	0.777395	0.723527	0.921347	0.882027	0.853469	0.77117
blockB	0.368227	0.46029	0.333117	0.348328	0.444655	0.608955	0.729768	0.704161	0.860381	1.00003
blockB	0.82118	0.76438	0.513962	0.572873	0.791506	1.00002	0.921839	0.838272	0.725176	0.96388
blockB	0.387044	0.696952	0.505938	0.479429	0.80467	0.75738	0.799751	0.681993	0.835705	1.00001
blockB	0.302741	0.434095	0.673038	0.912951	0.806262	1.00002	0.885687	0.728025	0.666484	0.751155
blockB	0.792667	0.790916	0.564957	0.635237	0.732682	0.847745	0.903613	0.861388	0.968968	1
blockB	0.576153	1	0.527645	0.571512	0.694173	0.734969	0.799865	0.721516	0.854641	0.975795
E23	0.752271	1.00008	0.795551	0.568081	0.253097	0.208003	0.201815	0.260894	0.375421	0.663296
E23	1.00004	0.971571	0.750825	0.570516	0.469612	0.158831	0.278424	0.353728	0.680374	0.79326
E23	0.651889	1.00002	0.862	0.774298	0.908869	0.938616	0.794182	0.692125	0.651256	0.999924
E23	0.565217	1	0.955237	0.888802	0.884658	0.808475	0.702484	0.538733	0.527339	0.633113
E23	0.860288	1.04501	0.893061	0.795338	0.49229	0.410971	0.352342	0.228587	0.596055	1.0001
E23	0.859867	1.00008	0.995326	0.963388	0.846272	0.607804	0.441602	0.445475	0.585532	0.835167
E23	0.801411	0.876523	0.943131	1.00003	0.810209	0.789184	0.670312	0.528795	0.553644	0.863186
E23	0.894104	0.88314	0.95871	1.01365	1.00007	0.943104	0.992353	0.997893	0.9762	0.908223
E23	0.322369	0.382551	0.328896	0.35186	0.229908	0.245483	0.252901	0.247439	0.319286	0.433469
E23	0.565984	1.00002	0.910316	0.85697	0.665208	0.560967	0.670566	0.579957	0.61536	0.682646
E23	0.449655	0.512713	0.60036	0.513396	0.379159	0.323071	0.256684	0.275082	0.363446	0.346071
E23	0.466677	0.49912	0.382455	0.419862	0.452264	0.417233	0.578724	0.660094	1.00011	0.3266
E23	0.779562	1.00003	0.961792	0.933905	0.745926	0.92428	0.786028	0.82095	0.981686	0.780661
E19	0.992429	0.745729	0.637619	0.760741	0.939383	1.01943	0.956761	0.988692	0.943494	1
E19	0.68445	0.595175	0.592416	0.578077	0.676142	0.754848	0.941982	0.832888	1.00001	0.928217
E19	0.871435	0.675321	0.776691	0.833225	0.880194	0.916836	1	0.898214	0.720095	0.68576
E19	0.824166	0.421856	0.328087	0.66803	0.807013	0.6081	1.00002	0.881022	0.99263	0.887006
E19	0.660148	0.590646	0.613564	0.730758	0.874719	0.805894	0.914019	1.00001	0.881073	0.777247
E19	0.999945	0.757776	0.612059	0.662405	0.755837	0.567058	0.619658	0.700084	0.568679	0.423419
E19	1	0.789803	0.714724	0.870504	0.896778	0.708475	0.851671	0.856157	0.815297	0.68652
E19	1	0.616651	0.62597	0.737147	0.825636	0.755743	0.756742	0.870868	0.830807	0.648688
E19	0.644986	0.784093	0.903487	0.974334	0.964227	0.679646	0.857519	1	0.7417	0.494814
E19	0.327825	0.398664	0.348731	0.335254	0.368494	0.477797	0.418575	0.512272	0.828161	1.00002
E19	1.00001	0.95934	0.932358	1.0415	0.988608	0.785658	0.962431	0.98509	0.945028	0.757302
E19	0.761405	0.837819	0.765341	0.667162	0.68129	0.534323	0.71505	1.00001	0.851036	0.769344
E19	0.378326	1.13164	1.00001	0.917591	0.20381	0.440633	0.517905	0.682887	1.0466	0.58076
E19	0.381565	0.565505	0.633903	0.442829	0.450539	0.556682	0.655039	1.00002	0.651683	0.0424457
E19	0.720797	0.720753	0.747042	0.8508	0.567708	0.548468	0.827068	1	0.945476	0.779859
E19	0.67116	0.617561	0.83583	0.879092	0.664699	0.617054	1.04155	1	1.02552	0.674336
E19	0.628911	0.96794	0.886593	0.85733	0.807048	0.945314	1.00001	0.933058	0.884468	0.543436
E19	0.543161	0.520748	0.523657	0.689815	0.777557	0.656056	0.777266	0.870925	0.999921	0.908149
E28	0.746199	1.00001	0.951932	0.805352	0.710441	0.505233	0.575486	0.610115	0.701592	0.447774
E28	0.680451	0.973658	1	0.803422	0.640926	0.406582	0.341356	0.273096	0.29734	0.33004
E28	0.485205	0.783207	1.00001	0.986763	0.887774	0.732002	0.718151	0.748407	0.740451	0.659321
E28	0.686673	1	0.943855	0.777741	0.59225	0.742055	0.745273	0.694116	0.765366	0.867553
E28	0.664577	0.671911	0.712765	0.571503	0.503786	0.538272	0.58969	0.672904	0.863153	1
E28	0.886512	1.00001	0.988799	0.940749	0.73024	0.62726	0.739564	0.784119	0.827114	0.616008
E28	0.690886	0.883798	0.952753	0.821103	0.708234	0.796035	0.957599	1.00001	0.995747	0.887527
Mean per embryo
Block A	0.370064	0.54406	0.547616	0.525098	0.510311	0.506584	0.523236	0.533074	0.630794	0.720596
Block B	0.644791	0.746978	0.627056	0.641961	0.742501	0.806978	0.801575	0.727797	0.739866	0.702769
E19	0.727262	0.70539	0.693227	0.749811	0.729427	0.687668	0.822959	0.889567	0.870649	0.699295
E23	0.689949	0.859296	0.795205	0.742315	0.625965	0.564309	0.536801	0.509981	0.632747	0.712747
E28	0.691501	0.901799	0.935731	0.815234	0.68195	0.621063	0.666731	0.683252	0.741537	0.686889
Mean	0.624713	0.751505	0.719767	0.694884	0.658031	0.63732	0.670261	0.668734	0.723119	0.704459
SD	0.10186	0.103234	0.116561	0.0890833	0.0719144	0.0880021	0.113605	0.117765	0.0730786	0.00976974
NB	5	5	5	5	5	5	5	5	5	5
SEM	0.045553	0.0461679	0.0521275	0.0398393	0.0321611	0.0393557	0.0508058	0.0526663	0.0326817	0.00436916
						Observed distribution		0.624713	0.751505	0.719767	0.694884	0.658031	0.63732	0.670261	0.668734	0.723119	0.704459
						Theoritical distribution		0.685279	0.685279	0.685279	0.685279	0.685279	0.685279	0.685279	0.685279	0.685279	0.685279
						KS test
						p-value	0.1641
