# Supplementary material for: SlitC-PlexinA1 mediates iterative inhibition for orderly passage of spinal commissural axons through the floor plate
Source: eLife. 2020 Dec 21;9:e63205. doi: 10.7554/eLife.63205 (PMC7775108; doi:10.7554/eLife.63205)
Supplement: Figure 5—source data 2. [file elife-63205-fig5-data2.xlsx]

## Sheet: Figure 5E
		Pearson						Between
Embryo	Image	Apical	Basal a	Basal b		Paired t-test		Apical v Basal a	Basal a v Basal b
1	1	0.929	0.636	0.044			p-values	<0.0001	<0.0001
	2	0.835	0.61	0.077
	3	0.869	0.565	0.12
	4	0.959	0.441	0.111
	5	0.8	0.652	0.177
	6	0.69	0.294	0.043
	7	0.855	0.263	0.093
	8	0.892	0.424	0.227
	9	0.945	0.733	0.192	0.863778	0.513111	0.120444
2	1	0.97	0.521	0.243
	2	0.939	0.684	0.218
	3	0.948	0.603	0.087
	4	0.959	0.55	0.085
	5	0.868	0.364	0.102
	6	0.973	0.592	0.168
	7	0.946	0.498	0.283
	8	0.955	0.604	0.14
	9	0.844	0.386	0.098	0.933556	0.533556	0.158222
3	1	0.952	0.603	0.131
	2	0.945	0.231	0.051
	3	0.867	0.239	0.138
	4	0.961	0.366	0.268
	5	0.898	0.487	0.105
	6	0.936	0.747	0.114
	7	0.855	0.6	0.077
	8	0.897	0.272	0.027
	9	0.936	0.454	0.159	0.916333	0.444333	0.118889
