# Supplementary material for: SlitC-PlexinA1 mediates iterative inhibition for orderly passage of spinal commissural axons through the floor plate
Source: eLife. 2020 Dec 21;9:e63205. doi: 10.7554/eLife.63205 (PMC7775108; doi:10.7554/eLife.63205)
Supplement: Figure 5—source data 3. [file elife-63205-fig5-data3.xlsx]

## Sheet: Figure 5F
		Signal intensity without background noise
		Apical		Basal a		Basal b				Ratio	Basal A		Basal B
Embryo	Image	Cerulean	Venus	Cerulean	Venus	Cerulean	Venus				Cerulean	Venus	Cerulean	Venus		Paired t-test		Cerulean v Venus Basal a	Cerulean v Venus Basal b
1	1	14.216	7.564	3.585	2.984	1.491	1.819				0.252181	0.3945	0.104882	0.240481			p-values	0.0004	<0.0001
	2	7.851	4.501	4.083	2.948	1.387	1.65				0.520061	0.654966	0.176665	0.366585
	3	8.679	4.109	5.213	2.629	1.335	0.876				0.600645	0.639815	0.15382	0.213191
	4	18.139	9.211	2.736	2.813	0.747	1.445				0.150835	0.305396	0.041182	0.156878
	5	6.767	4.527	3.843	2.92	1.301	1.707				0.567903	0.645019	0.192257	0.377071
	6	4.391	2.452	2.015	1.522	0.82	0.887				0.458893	0.620718	0.186746	0.361746
	7	4.769	3.507	1.93	2.01	1.308	1.51				0.404697	0.573139	0.274271	0.430567
	8	6.056	6.056	5.139	3.331	1.819	1.819				0.84858	0.550033	0.300363	0.300363
	9	9.249	4.922	4.933	2.805	1.732	1.373				0.533355	0.56989	0.187263	0.278952
2	1	13.62	7.889	2.041	2.278	1.272	1.544				0.149853	0.288756	0.0933921	0.195716
	2	10.33	5.459	3.397	2.147	1.547	1.222				0.328848	0.393295	0.149758	0.223851
	3	11.663	6.159	1.957	1.421	0.934	0.858				0.167796	0.230719	0.0800823	0.139308
	4	14.209	7.947	2.995	2.446	1.182	1.337				0.210782	0.307789	0.0831867	0.16824
	5	7.014	4.759	2.68	2.344	1.447	1.438				0.382093	0.49254	0.206302	0.302164
	6	11.665	6.862	2.614	2.062	1.394	1.28				0.224089	0.300495	0.119503	0.186535
	7	25.276	16.161	5.197	3.835	2.217	2.217				0.20561	0.2373	0.0877117	0.137182
	8	22.048	12.618	4.817	3.483	1.618	1.251				0.218478	0.276034	0.0733853	0.0991441
	9	7.191	3.835	3.766	2.171	1.69	1.061				0.52371	0.566102	0.235016	0.276662
3	1	11.046	6.885	2.671	2.671	1.683	1.683				0.241807	0.387945	0.152363	0.244444
	2	21.888	12.278	1.241	1.241	1.297	0.782				0.0566977	0.101075	0.0592562	0.0636912
	3	6.898	3.508	2.489	1.306	1.426	0.603				0.360829	0.372292	0.206727	0.171893
	4	25.453	13.706	4.706	3.409	3.413	2.459				0.18489	0.248723	0.13409	0.17941
	5	11.94	6.311	1.689	0.97	3.277	2.121				0.141457	0.1537	0.274456	0.33608
	6	16.006	7.814	3.684	2.133	1.501	0.783				0.230164	0.272972	0.0937773	0.100205
	7	7.941	4.904	3.848	2.94	1.299	1.31				0.484574	0.599511	0.163581	0.267129
	8	7.697	4.804	1.596	1.67	0.847	1.017				0.207354	0.347627	0.110043	0.211699
	9	16.1	9.091	2.818	1.674	1.391	0.856				0.175031	0.184138	0.0863975	0.0941591
