# Supplementary material for: SlitC-PlexinA1 mediates iterative inhibition for orderly passage of spinal commissural axons through the floor plate
Source: eLife. 2020 Dec 21;9:e63205. doi: 10.7554/eLife.63205 (PMC7775108; doi:10.7554/eLife.63205)
Supplement: Figure 5—source data 4. [file elife-63205-fig5-data4.xlsx]

## Sheet: Figure 5I
GFP-Slit2N		Signal intensity								Slit2C-GFP		Signal intensity
Embryo	Image	Apical	Basal	Background noise		Ratio	Basal/Apical			Embryo	Image	Apical	Basal	Background noise		Ratio	Basal/Apical
1	1	286.12	91.582	54.718			0.159307			1	1	651.962	284.888	117.741			0.992683
	2	328.256	89.449	54.978			0.126139				2	749.246	285.889	121.901			0.794689
	3	566.821	102.325	56.167			0.09039				3	888.869	256.379	119.174			0.306503
	4	275.171	79.992	46.563			0.146228				4	914.702	341.892	113.569			1.41287
	5	229.096	62.859	49.217			0.0758399				5	957.123	286.237	105.977			1.46411
	6	281.975	67.429	47.931			0.0833091				6	689.65	238.413	104.233			0.754914
	7	642.638	163.884	49.202			0.193251				7	848.357	223.008	108.211			0.214804
	8	334.52	98.641	50.397			0.1698				8	898.062	226.577	112.002			0.5149
	9	392.759	89.932	50.45			0.11534				9	755.957	223.853	111.81			0.398804
2	1	338.203	93.209	53.855			0.138401			2	1	314.175	165.006	124.989			0.187685
	2	299.959	99.529	51.643			0.192843				2	355.998	156.431	124.399			0.182456
	3	182.759	99.71	51.27			0.368396				3	372.65	147.506	120.036			0.437957
	4	153.428	80.204	51.046			0.284796				4	316.475	122.385	99.422			0.425193
	5	162.516	69.956	52.432			0.159188				5	213.614	103.426	93.101			0.148743
	6	121.45	65.623	52.432			0.191124				6	208.016	107.104	91.657			0.518477
	7	367.526	89.886	54.503			0.113036				7	404.025	235.759	137.638			0.426821
	8	390.37	92.311	54.283			0.113149				8	536.695	220.325	133.852			0.337103
	9	449.428	100.365	54.678			0.115737				9	471.664	233.568	150.727			0.277338
3	1	636.819	165.949	57.764			0.18683			3	1	795.346	244.779	98.928			0.271153
	2	722.978	178.65	58.357			0.180995				2	1102.04	196.157	97.018			0.158379
	3	727.82	142.294	58.684			0.124952				3	685.622	220.308	97.448			0.194901
	4	597.113	179.371	57.066			0.226471				4	285.894	113.525	82.007			0.0611874
	5	412.972	139.346	61.776			0.220874				5	300.242	129.397	106.44			0.0748927
	6	236.495	93.119	55.019			0.209945				6	298.221	129.006	98.287			0.222266
	7	663.115	203.256	54.514			0.2444				7	1356.93	339.711	125.79			0.398122
	8	512.629	170.414	56.123			0.25036				8	1283.78	293.932	126.261			0.433967
	9	393.226	117.567	58.699			0.175974				9	1425.38	299.935	123.45			0.654191
	Unpaired t-test	GFP-SlitN v SlitC-GFP
		0.5257
