# Supplementary material for: SlitC-PlexinA1 mediates iterative inhibition for orderly passage of spinal commissural axons through the floor plate
Source: eLife. 2020 Dec 21;9:e63205. doi: 10.7554/eLife.63205 (PMC7775108; doi:10.7554/eLife.63205)
Supplement: Figure 5—source data 5. [file elife-63205-fig5-data5.xlsx]

## Sheet: Figure 5J
Dual-tagged Slit2		Apical		Basal			Ratio	Basal/Apical			Mann-Whitney		Cerulean v GFP-Slit2N	Venus v Slit2C-GFP	Venus v GFP-Slit2N
Embryo	Image	Cerulean	Venus	Cerulean	Venus			Cerulean	Venus			p-values	0.0543	<0.0001	<0.0001
1	1	14.216	7.564	2.538	2.4015			0.178531	0.317491
	2	7.851	4.501	2.735	2.299			0.348363	0.510775
	3	8.679	4.109	3.274	1.7525			0.377232	0.426503		Wilcoxon		Venus v Cerulean
	4	18.139	9.211	1.7415	2.129			0.0960086	0.231137			p-values	<0.0001
	5	6.767	4.527	2.572	2.3135			0.38008	0.511045
	6	4.391	2.452	1.4175	1.2045			0.322819	0.491232
	7	4.769	3.507	1.619	1.76			0.339484	0.501853
	8	6.056	6.056	3.479	2.575			0.574472	0.425198
	9	9.249	4.922	3.3325	2.089			0.360309	0.424421
2	1	13.62	7.889	1.6565	1.911			0.121623	0.242236
	2	10.33	5.459	2.472	1.6845			0.239303	0.308573
	3	11.663	6.159	1.4455	1.1395			0.123939	0.185014
	4	14.209	7.947	2.0885	1.8915			0.146984	0.238014
	5	7.014	4.759	2.0635	1.891			0.294197	0.397352
	6	11.665	6.862	2.004	1.671			0.171796	0.243515
	7	25.276	16.161	3.707	3.026			0.146661	0.187241
	8	22.048	12.618	3.2175	2.367			0.145932	0.187589
	9	7.191	3.835	2.728	1.616			0.379363	0.421382
3	1	11.046	6.885	2.177	2.177			0.197085	0.316195
	2	21.888	12.278	1.269	1.0115			0.057977	0.0823831
	3	6.898	3.508	1.9575	0.9545			0.283778	0.272092
	4	25.453	13.706	4.0595	2.934			0.15949	0.214067
	5	11.94	6.311	2.483	1.5455			0.207956	0.24489
	6	16.006	7.814	2.5925	1.458			0.161971	0.186588
	7	7.941	4.904	2.5735	2.125			0.324078	0.43332
	8	7.697	4.804	1.2215	1.3435			0.158698	0.279663
	9	16.1	9.091	2.1045	1.265			0.130714	0.139149
GFP-SlitN		Signal intensity								Slit2C-GFP		Signal intensity
Embryo	Image	Apical	Basal	Background noise		Ratio	Basal/Apical			Embryo	Image	Apical	Basal	Background noise		Ratio	Basal/Apical
1	1	286.12	91.582	54.718			0.159307			1	1	651.962	284.888	117.741			0.31288
	2	328.256	89.449	54.978			0.126139				2	749.246	285.889	121.901			0.2614
	3	566.821	102.325	56.167			0.09039				3	888.869	256.379	119.174			0.178259
	4	275.171	79.992	46.563			0.146228				4	914.702	341.892	113.569			0.285
	5	229.096	62.859	49.217			0.0758399				5	957.123	286.237	105.977			0.211785
	6	281.975	67.429	47.931			0.0833091				6	689.65	238.413	104.233			0.229204
	7	642.638	163.884	49.202			0.193251				7	848.357	223.008	108.211			0.1551
	8	334.52	98.641	50.397			0.1698				8	898.062	226.577	112.002			0.145758
	9	392.759	89.932	50.45			0.11534				9	755.957	223.853	111.81			0.173941
2	1	338.203	93.209	53.855			0.138401			2	1	314.175	165.006	124.989			0.211522
	2	299.959	99.529	51.643			0.192843				2	355.998	156.431	124.399			0.138308
	3	182.759	99.71	51.27			0.368396				3	372.65	147.506	120.036			0.108743
	4	153.428	80.204	51.046			0.284796				4	316.475	122.385	99.422			0.105794
	5	162.516	69.956	52.432			0.159188				5	213.614	103.426	93.101			0.0856754
	6	121.45	65.623	52.432			0.191124				6	208.016	107.104	91.657			0.132753
	7	367.526	89.886	54.503			0.113036				7	404.025	235.759	137.638			0.36834
	8	390.37	92.311	54.283			0.113149				8	536.695	220.325	133.852			0.214657
	9	449.428	100.365	54.678			0.115737				9	471.664	233.568	150.727			0.258122
3	1	636.819	165.949	57.764			0.18683			3	1	795.346	244.779	98.928			0.20943
	2	722.978	178.65	58.357			0.180995				2	1102.04	196.157	97.018			0.098644
	3	727.82	142.294	58.684			0.124952				3	685.622	220.308	97.448			0.208884
	4	597.113	179.371	57.066			0.226471				4	285.894	113.525	82.007			0.154586
	5	412.972	139.346	61.776			0.220874				5	300.242	129.397	106.44			0.118456
	6	236.495	93.119	55.019			0.209945				6	298.221	129.006	98.287			0.153646
	7	663.115	203.256	54.514			0.2444				7	1356.93	339.711	125.79			0.173758
	8	512.629	170.414	56.123			0.25036				8	1283.78	293.932	126.261			0.144854
	9	393.226	117.567	58.699			0.175974				9	1425.38	299.935	123.45			0.135557
