# Supplementary material for: SlitC-PlexinA1 mediates iterative inhibition for orderly passage of spinal commissural axons through the floor plate
Source: eLife. 2020 Dec 21;9:e63205. doi: 10.7554/eLife.63205 (PMC7775108; doi:10.7554/eLife.63205)
Supplement: Figure 5—source data 6. [file elife-63205-fig5-data6.xlsx]

## Sheet: Figure 5K
		Signal intensity without background noise
Dual-tagged Slit2		Apical		Basal lamina			Ratio	Basal lamina/Apical			Mann-Whitney		Cerulean v GFP-Slit2N	Venus v Slit2C-GFP	Venus v GFP-Slit2N
Embryo	Image	Cerulean	Venus	Cerulean	Venus			Cerulean	Venus			p-values	0.0023	0.0004	<0.0001
1	1	14.216	7.564	1.552	2.024			0.109173	0.267583
	2	7.851	4.501	1.389	1.165			0.17692	0.258831
	3	8.679	4.109	0.952	0.567			0.10969	0.13799		Wilcoxon		Venus v Cerulean
	4	18.139	9.211	0.727	1.441			0.0400794	0.156443			p-values	0.0655
	5	6.767	4.527	1.453	1.486			0.214718	0.328253
	6	4.391	2.452	1.03	0.659			0.234571	0.26876
	7	4.769	3.507	1.54	0.983			0.322919	0.280297
	8	6.056	6.056	1.868	1.209			0.308454	0.199637
	9	9.249	4.922	1.585	0.925			0.17137	0.187932
2	1	13.62	7.889	1.286	1.116			0.09442	0.141463
	2	10.33	5.459	0.654	0.499			0.0633107	0.0914087
	3	11.663	6.159	0.501	0.358			0.0429564	0.0581263
	4	14.209	7.947	1.277	1.405			0.0898726	0.176796
	5	7.014	4.759	1.026	1.069			0.146279	0.224627
	6	11.665	6.862	0.965	0.733			0.0827261	0.10682
	7	25.276	16.161	2.156	1.424			0.0852983	0.0881134
	8	22.048	12.618	1.698	0.817			0.0770138	0.0647488
	9	7.191	3.835	2.004	0.803			0.278682	0.209387
3	1	11.046	6.885	3.109	1.649			0.281459	0.239506
	2	21.888	12.278	1.71	0.734			0.078125	0.0597817
	3	6.898	3.508	1.03	0.241			0.149319	0.0687001
	4	25.453	13.706	3.644	2.834			0.143166	0.206771
	5	11.94	6.311	1.803	0.939			0.151005	0.148788
	6	16.006	7.814	1.597	0.515			0.0997751	0.0659073
	7	7.941	4.904	1.845	1.31			0.232338	0.267129
	8	7.697	4.804	0.51	0.814			0.0662596	0.169442
	9	16.1	9.091	0.954	0.815			0.0592547	0.0896491
GFP-SlitN		Signal intensity								Slit2C-GFP		Signal intensity
Embryo	Image	Apical	Basal	Background noise		Ratio	Basal lamina/Apical			Embryo	Image	Apical	Basal	Background noise		Ratio	Basal lamina/Apical
1	1	286.12	62.082	54.718			0.0318234			1	1	651.962	365.006	117.741			0.462852
	2	328.256	68.742	54.978			0.0503663				2	749.246	315.933	121.901			0.309291
	3	566.821	67.687	56.167			0.0225593				3	888.869	271.696	119.174			0.198159
	4	275.171	58.18	46.563			0.0508162				4	914.702	344.17	113.569			0.287844
	5	229.096	57.271	49.217			0.0447745				5	957.123	467.305	105.977			0.424519
	6	281.975	50.284	47.931			0.0100537				6	689.65	244.108	104.233			0.238932
	7	642.638	82.292	49.202			0.05576				7	848.357	340.543	108.211			0.3139
	8	334.52	60.604	50.397			0.0359246				8	898.062	277.002	112.002			0.209908
	9	392.759	56.951	50.45			0.0189916				9	755.957	334.38	111.81			0.345527
2	1	338.203	72.311	53.855			0.0649064			2	1	314.175	194.685	124.989			0.368399
	2	299.959	71.432	51.643			0.0796928				2	355.998	186.953	124.399			0.270096
	3	182.759	69.181	51.27			0.136217				3	372.65	222.236	120.036			0.40457
	4	153.428	64.132	51.046			0.127815				4	316.475	128.627	99.422			0.134552
	5	162.516	59.612	52.432			0.0652229				5	213.614	103.538	93.101			0.0866048
	6	121.45	56.435	52.432			0.0579994				6	208.016	106.692	91.657			0.129212
	7	367.526	75.335	54.503			0.066551				7	404.025	187.039	137.638			0.185448
	8	390.37	73.243	54.283			0.056414				8	536.695	281.47	133.852			0.366441
	9	449.428	73.403	54.678			0.0474351				9	471.664	305.349	150.727			0.481783
3	1	636.819	164.092	57.764			0.183623			3	1	795.346	341.327	98.928			0.348065
	2	722.978	108.668	58.357			0.0756988				2	1102.04	275.194	97.018			0.177286
	3	727.82	113.705	58.684			0.0822269				3	685.622	209.897	97.448			0.191183
	4	597.113	202.641	57.066			0.26956				4	285.894	139.781	82.007			0.283363
	5	412.972	123.381	61.776			0.175415				5	300.242	130.656	106.44			0.124952
	6	236.495	71.547	55.019			0.0910754				6	298.221	133.73	98.287			0.177274
	7	663.115	170.503	54.514			0.190583				7	1356.93	443.232	125.79			0.257844
	8	512.629	140.04	56.123			0.183825				8	1283.78	468.055	126.261			0.295282
	9	393.226	82.846	58.699			0.0721825				9	1425.38	487.828	123.45			0.279876
