# Supplementary material for: SlitC-PlexinA1 mediates iterative inhibition for orderly passage of spinal commissural axons through the floor plate
Source: eLife. 2020 Dec 21;9:e63205. doi: 10.7554/eLife.63205 (PMC7775108; doi:10.7554/eLife.63205)
Supplement: Figure 6—source data 1. [file elife-63205-fig6-data1.xlsx]

## Sheet: Figure 6D
		Signal intensity without background noise
Dual-tagged Slit2		Apical		Basal			Ratio	Basal/Apical			Mann-Whitney		Cerulean DT v Δ	Venus DT v Δ
Embryo	Image	Cerulean	Venus	Cerulean	Venus			Cerulean	Venus			p-values	0.0078	<0.0001
1	1	14.216	7.564	2.538	2.4015			0.178531	0.317491
	2	7.851	4.501	2.735	2.299			0.348363	0.510775
	3	8.679	4.109	3.274	1.7525			0.377232	0.426503
	4	18.139	9.211	1.7415	2.129			0.0960086	0.231137
	5	6.767	4.527	2.572	2.3135			0.38008	0.511045
	6	4.391	2.452	1.4175	1.2045			0.322819	0.491232
	7	4.769	3.507	1.619	1.76			0.339484	0.501853
	8	6.056	6.056	3.479	2.575			0.574472	0.425198
	9	9.249	4.922	3.3325	2.089			0.360309	0.424421
2	1	13.62	7.889	1.6565	1.911			0.121623	0.242236
	2	10.33	5.459	2.472	1.6845			0.239303	0.308573
	3	11.663	6.159	1.4455	1.1395			0.123939	0.185014
	4	14.209	7.947	2.0885	1.8915			0.146984	0.238014
	5	7.014	4.759	2.0635	1.891			0.294197	0.397352
	6	11.665	6.862	2.004	1.671			0.171796	0.243515
	7	25.276	16.161	3.707	3.026			0.146661	0.187241
	8	22.048	12.618	3.2175	2.367			0.145932	0.187589
	9	7.191	3.835	2.728	1.616			0.379363	0.421382
3	1	11.046	6.885	2.177	2.177			0.197085	0.316195
	2	21.888	12.278	1.269	1.0115			0.057977	0.0823831
	3	6.898	3.508	1.9575	0.9545			0.283778	0.272092
	4	25.453	13.706	4.0595	2.934			0.15949	0.214067
	5	11.94	6.311	2.483	1.5455			0.207956	0.24489
	6	16.006	7.814	2.5925	1.458			0.161971	0.186588
	7	7.941	4.904	2.5735	2.125			0.324078	0.43332
	8	7.697	4.804	1.2215	1.3435			0.158698	0.279663
	9	16.1	9.091	2.1045	1.265			0.130714	0.139149
Dual-tagged Slit2 Δ		Apical		Basal b			Ratio	Basal B
Embryo	Image	Cerulean	Venus	Cerulean	Venus			Cerulean	Venus
1	1	50.826	30.659	4.061	4.925			0.0799001	0.160638
	2	22.42	13.849	3.56	2.353			0.158787	0.169904
	3	22.752	14.117	1.413	1.251			0.0621044	0.0886166
	4	25.093	14.659	5.866	3.409			0.23377	0.232553
	5	46.897	30.179	3.9611	1.864			0.0844638	0.0617648
	6	19.223	12.681	2.788	2.2			0.145035	0.173488
2	1	22.539	12.454	3.427	2.574			0.152048	0.206681
	2	32.224	9.991	4.518	1.966			0.140206	0.196777
	3	15.292	6.33	2.263	0.756			0.147986	0.119431
	4	12.476	6.997	2.364	1.057			0.189484	0.151065
	5	14.89	10.013	3.304	2.203			0.221894	0.220014
	6	42.451	8.586	7.582	1.544			0.178606	0.179828
3	1	67.392	13.421	18.833	2.968			0.279455	0.221146
	2	43.081	8.057	7.434	1.167			0.172559	0.144843
	3	21.485	3.42	1.94	0.343			0.0902956	0.100292
	4	58.381	28.747	9.002	3.241			0.154194	0.112742
	5	17.655	7.083	3.013	1.771			0.17066	0.250035
	6	72.354	30.327	8.748	3.743			0.120906	0.123421
	7	81.38	81.671	14.354	12.591			0.176382	0.154167
