# Supplementary material for: SlitC-PlexinA1 mediates iterative inhibition for orderly passage of spinal commissural axons through the floor plate
Source: eLife. 2020 Dec 21;9:e63205. doi: 10.7554/eLife.63205 (PMC7775108; doi:10.7554/eLife.63205)
Supplement: Figure 6—source data 2. [file elife-63205-fig6-data2.xlsx]

## Sheet: Figure 6F
	Slit2 FL	Slit2 FL delta	Slit2 FL + CMK
Slit2FL	929291	1527058	4826196
Tubulin	3396208	1082205	3125884
Slit2FL/tubulin	27.3626	141.106	154.395
%	100	515.69	564.254
