# Supplementary material for: SlitC-PlexinA1 mediates iterative inhibition for orderly passage of spinal commissural axons through the floor plate
Source: eLife. 2020 Dec 21;9:e63205. doi: 10.7554/eLife.63205 (PMC7775108; doi:10.7554/eLife.63205)
Supplement: Figure 6—source data 3. [file elife-63205-fig6-data3.xlsx]

## Sheet: Figure 6G
	Slit2 FL	Slit2 FL delta	Slit2 FL + CMK
SlitC	3864113	83145	802240
SlitC/tubulin	113.777	7.68293	25.6644
%	100	6.7526	22.5567
