# Supplementary material for: SlitC-PlexinA1 mediates iterative inhibition for orderly passage of spinal commissural axons through the floor plate
Source: eLife. 2020 Dec 21;9:e63205. doi: 10.7554/eLife.63205 (PMC7775108; doi:10.7554/eLife.63205)
Supplement: Figure 6—source data 4. [file elife-63205-fig6-data4.xlsx]

## Sheet: Figure 6J
PC2 IF		Signal intensity
Embryo	File	Apical	Basal a	Basal b		Unpaired t-test		Apical v Basal b	Basal a v Basal b
1	1	675.044	448.458	396.068			p-values	0.025	0.0803
	2	1615.01	692.301	1098.6
	3	1363.29	684.377	862.134
	4	2333.36	1421.27	1936.18
	5	663.081	312.846	544.842
	6	1686.86	595.741	1071.2
	7	1031.86	219.059	612.949
	8	841.96	584.867	688.738
	9	321.416	313.434	118.684
	10	357.361	63.692	252.345
2	1	799.649	1058.05	328.719
	2	719.265	1171.28	483.5
	3	861.026	944.622	394.759
	4	946.849	1032.9	797.724
	5	666.085	738.692	495.609
	6	753.521	718.499	375.973
	7	667.451	613.429	582.119
	8	828.88	731.747	161.417
	9	761.22	789.328	579.476
	10	879.68	745.579	126.714
	11	1155.02	1028.05	91.533
	12	595.597	790.066	230.809
3	1	1001.07	1295	950.056
	2	276.692	514.718	459.106
	3	297.956	348.145	376.23
	4	668.488	1037.82	658.016
	5	467.979	665.647	401.664
	6	319.298	396.378	344.249
	7	245.261	238.331	204.37
	8	706.577	904.22	662.033
	9	237.949	268.223	371.091
	10	489.886	712.261	657.765
	11	527.035	574.601	527.056
	12	375.2	581.759	437.266
	13	270.144	377.9	336.162
