# Supplementary material for: SlitC-PlexinA1 mediates iterative inhibition for orderly passage of spinal commissural axons through the floor plate
Source: eLife. 2020 Dec 21;9:e63205. doi: 10.7554/eLife.63205 (PMC7775108; doi:10.7554/eLife.63205)
Supplement: Figure 6—source data 5. [file elife-63205-fig6-data5.xlsx]

## Sheet: Figure 6K
		Signal intensity
DMSO		Apical		Basal		Background noise			Ratio	Basal/Apical			Unpaired t-test		Cerulean DMSO v CMK	Venus DMSO v CMK
Embryo	Image	Cerulean	Venus	Cerulean	Venus	Cerulean	Venus			Cerulean	Venus			p-value	0.0498	0.0356
1	1	120.851	120.851	26.508	23.617	7.987	1.794			0.1641	0.183299
	2	85.805	69.416	24.083	19.833	5.425	1.284			0.232122	0.272251
	3	84.896	76.831	23.06	18.576	4.68	1.087			0.229131	0.230896
	4	130.525	111.021	31.666	25.934	10.101	6.969			0.179076	0.182265
	5	52.321	45.363	21.31	18.103	6.051	4.691			0.329782	0.32976
	6	81.206	65.23	10.874	8.501	5.25	4.564			0.0740429	0.0648963
	7	127.603	119.907	38.85	31.036	9.577	5.165			0.248022	0.225471
	8	120.902	114.081	28.042	23.071	12.367	6.31			0.144423	0.155524
	9	92.641	83.463	33.772	27.549	7.395	4.02			0.309422	0.296175
2	1	133.016	131.904	31.466	28.393	15.853	5.24			0.133259	0.182791
	2	143.012	135.562	29.391	25.586	15.863	5.21			0.106395	0.156315
	3	98.564	87.077	20.335	17.24	9.292	3.457			0.123701	0.164829
	4	139.109	127.381	24.87	20.073	16.534	8.455			0.0680073	0.097691
	5	173.392	155.626	27.228	24.358	11.575	4.917			0.0967327	0.128997
	6	177.274	153.547	24.398	19.989	11.948	4.899			0.0753058	0.101515
	7	98.553	100.08	26.088	20.73	7.455	1.208			0.204538	0.197447
	8	91.502	93.434	25.247	22.921	18.586	7.574			0.0913517	0.178744
	9	153.606	143.009	31.767	29.81	8.086	3.901			0.162734	0.186251
3	1	104.201	79.894	47.171	34.956	16.214	5.328			0.351836	0.397339
	2	120.942	82.043	40.556	25.501	10.255	3.484			0.273754	0.280261
	3	100.182	61.661	27.699	16.026	9.736	3.215			0.198605	0.219194
	4	134.399	104.368	30.013	13.63	15.471	1.716			0.122276	0.116062
	5	105.549	75.056	35.018	18.102	12.994	1.496			0.237956	0.225748
	6	109.515	79.571	28.077	14.965	10.607	1.148			0.176629	0.176186
	7	112.859	94.777	50.318	30.291	19.548	2.568			0.329757	0.300654
	8	133.693	97.722	43.17	21.078	16.133	1.954			0.229985	0.199691
	9	129.168	92.503	44.273	28.679	16.284	2.217			0.247945	0.293091
CMK	Image
1	1	132.673	127.612	35.298	29.732	11.341	5.254			0.19745	0.200052
	2	67.724	49.887	12.314	9.683	6.239	3.225			0.0988046	0.1384
	3	84.64	65.772	8.463	6.624	3.779	2.222			0.0579266	0.0692683
	4	86.013	48.221	28.402	12.288	20.151	7.523			0.125277	0.117082
	5	88.737	81.627	18.816	13.161	14.848	5.565			0.0537022	0.0998659
	6	77.315	73.144	14.589	9.024	9.991	4.441			0.0682966	0.0667074
	7	76.792	96.891	23.106	25.76	7.228	3.241			0.22825	0.240459
	8	78.918	75.303	21.677	18.884	6.514	2.466			0.209422	0.225407
	9	65.029	67.003	12.463	10.426	7.226	3.44			0.0906008	0.109907
2	1	46.989	36.332	22.717	13.21	16.889	6.298			0.193621	0.230139
	2	68.594	56.954	27.392	18.175	16.166	6.373			0.214122	0.233329
	3	89.3	76.847	26.193	18.163	11.683	3.062			0.186944	0.204662
	4	82.754	47.562	31.372	16.457	19.357	9.413			0.18952	0.184644
	5	140.53	95.263	23.649	13.276	17.656	9.923			0.0487735	0.0392899
	6	143.653	97.217	31.218	19.666	11.53	4.663			0.149013	0.1621
	7	156.984	128.861	30.864	18.62	15.537	4.212			0.108359	0.115589
	8	132.629	97.789	21.357	12.589	8.229	1.05			0.105531	0.11928
	9	137.253	105.031	17.544	15.348	11.479	4.57			0.0482214	0.107285
3	1	97.26	46.219	32.173	10.072	13.249	1.262			0.225256	0.195965
	2	77.302	57.463	19.501	9.284	11.497	1.54			0.121632	0.138476
	3	61.812	42.306	18.475	10.793	7.315	0.613			0.204782	0.244166
	4	126.361	75.805	26.981	14.459	14.502	5.069			0.11156	0.132747
	5	60.787	51.848	27.828	15.385	15.085	3.552			0.278828	0.24501
	6	83.55	59.872	30.42	17.907	17.023	5.389			0.201377	0.22976
	7	89.138	52.178	29.931	10.71	21.278	1.839			0.127513	0.176225
	8	86.537	44.362	30.139	10.08	18.072	1.562			0.176251	0.199019
	9	58.233	46.309	21.538	10.881	11.859	1.25			0.208716	0.213742
