# Supplementary material for: SlitC-PlexinA1 mediates iterative inhibition for orderly passage of spinal commissural axons through the floor plate
Source: eLife. 2020 Dec 21;9:e63205. doi: 10.7554/eLife.63205 (PMC7775108; doi:10.7554/eLife.63205)
Supplement: Figure 7—figure supplement 1—source data 1. [file elife-63205-fig7-figsupp1-data1.xlsx]

## Sheet: Figure S7B
	PlxnA1 WT					PlxnA1 Y1815F
Embryo	Images	nb of counted growth cones	nb of enlarged growth cones	ratio enlarged growth cones over the total number of cones	Embryo	Images	nb of counted growth cones	nb of enlarged growth cones	ratio enlarged growth cones over the total number of cones
1	1.1	24	2	8.33333	1	1.1	11	0	0
	1.2	26	2	7.69231		1.2	11	1	9.09091
	1.3	20	1	5		1.3	14	2	14.2857
2	2.1	13	1	7.69231	2	2.1	19	5	26.3158
	2.2	17	1	5.88235		2.2	15	2	13.3333
	2.3	18	1	5.55556		2.3	7	1	14.2857
3	3.1	12	0	0	3	3.1	16	3	18.75
	3.2	23	1	4.34783		3.2	15	4	26.6667
	3.3	28	1	3.57143		3.3	17	6	35.2941
4	4.1	25	1	4	4	4.1	26	4	15.3846
	4.2	33	0	0		4.2	22	4	18.1818
	4.3	17	2	11.7647		4.3	26	2	7.69231
5	5.1	35	2	5.71429			199	34	16.6067
	5.2	41	1	2.43902				standart dev	7.02911
	5.3	35	3	8.57143
		367		5.37097
		standart dev		2.4318
	pHluo-PlxnA1wt	pHluo-PlxnA1Y1815F			Mann-Whitney test					Difference between medians
	5.37097	16.6067			Two-tailed p-value		0.0002			Median of column A	6,000, n=15
	2.4318	7.02911								Median of column B	14,50, n=12
										Difference: Actual	8.5
										Difference: Hodges-Lehmann	10
