# Supplementary material for: SlitC-PlexinA1 mediates iterative inhibition for orderly passage of spinal commissural axons through the floor plate
Source: eLife. 2020 Dec 21;9:e63205. doi: 10.7554/eLife.63205 (PMC7775108; doi:10.7554/eLife.63205)
Supplement: Figure 7—figure supplement 1—source data 2. [file elife-63205-fig7-figsupp1-data2.xlsx]

## Sheet: Figure S7E
PlxnA1 Y1815F/Y1815F
Exp2	Non collapsed	Intermediary	Collapsed	Total				Exp1	Non collapsed	Intermediary	Collapsed	Total			Total	Non collapsed	Intermediary	Collapsed	Total			Chi2
NB	55	0	30	85				NB	110	0	57	167	total of 3 coverslips		NB	273	0	130	403
	62	0	24	86											GDNF	151	0	64	215			NB	GDNF+SlitC	6.6925282023852E-24	***
	46	0	19	65	236	total of 3 coverslips									Sema3B	155	0	60	215			GDNF	GDNF+SlitC	1.5175409860349E-17	***
GDNF	39	0	19	58				GDNF	112	0	45	157	total of 3 coverslips		SlitC	135	0	62	197			Sema3B	GDNF+SlitC	6.2163842508363E-19	***
															GDNF+Sema3B	92	0	314	406			SlitC	GDNF+SlitC	2.0478519808868E-15	***
					58	total of 1 coverslip									GDNF+SlitC	126	41	196	363			GDNF+Sema3B	GDNF+SlitC	3.0942823943935E-16	***
Sema3B	41	0	6	47				Sema3B	99	0	41	140	total of 3 coverslips
	15	0	13	28																		GDNF	NB	0.525126621556	n.s.
					75	total of 2 coverslips									Total %	Non collapsed	Intermediary	Collapsed	Total			Sema3B	NB	0.26420110674435	n.s.
SlitC	8	0	5	13				SlitC	120	0	53	173	total of 3 coverslips		NB	67.7419	0	32.2581	100			SlitC	NB	0.84631847091876	n.s.
	7	0	4	11											GDNF	70.2326	0	29.7674	100			GDNF+Sema3B	NB	5.5329788467981E-38	***
					24	total of 2 coverslips									Sema3B	72.093	0	27.907	100			GDNF+SlitC	NB	6.6925282023852E-24	***
GDNF+Sema3B	12	0	50	62				GDNF+Sema3B	59	0	202	261	total of 3 coverslips		SlitC	68.5279	0	31.4721	100
	5	0	12	17											GDNF+Sema3B	22.6601	0	77.3399	100			NB	GDNF	0.525126621556	n.s.
	16	0	50	66	145	total of 3 coverslips									GDNF+SlitC	34.7107	11.2948	53.9945	100			Sema3B	GDNF	0.67024143612498	n.s.
GDNF+SlitC	14	0	16	30				GDNF+SlitC	79	27	151	257	total of 3 coverslips									SlitC	GDNF	0.70757446490681	n.s.
	24	8	20	52																		GDNF+Sema3B	GDNF	6.8266286090091E-31	***
	9	6	9	24	106	total of 3 coverslips																GDNF+SlitC	GDNF	1.5175409860349E-17	***
																						NB	Sema3B	0.26420110674435	n.s.
																						GDNF	Sema3B	0.67024143612498	n.s.
																						SlitC	Sema3B	0.4284998422295	n.s.
																						GDNF+Sema3B	Sema3B	4.8291109526129E-33	***
																						GDNF+SlitC	Sema3B	6.2163842508363E-19	***
																						NB	SlitC	0.84631847091876	n.s.
																						GDNF	SlitC	0.70757446490681	n.s.
																						Sema3B	SlitC	0.4284998422295	n.s.
																						GDNF+Sema3B	SlitC	1.1121051218422E-27	***
																						GDNF+SlitC	SlitC	2.0478519808868E-15	***
																						NB	GDNF+Sema3B	5.5329788467981E-38	***
																						GDNF	GDNF+Sema3B	6.8266286090091E-31	***
																						Sema3B	GDNF+Sema3B	4.8291109526129E-33	***
																						SlitC	GDNF+Sema3B	1.1121051218422E-27	***
																						GDNF+SlitC	GDNF+Sema3B	3.0942823943935E-16	***
