# Supplementary material for: SlitC-PlexinA1 mediates iterative inhibition for orderly passage of spinal commissural axons through the floor plate
Source: eLife. 2020 Dec 21;9:e63205. doi: 10.7554/eLife.63205 (PMC7775108; doi:10.7554/eLife.63205)
Supplement: Figure 7—source data 1. [file elife-63205-fig7-data1.xlsx]

## Sheet: Figure 7B-C
			Exploratory		Non-exploratory
	# embryo	# image	Splitting	Turned	Normal	Total				Splitting	Turned	Normal		#	Splitting	Turned	Normal		Exploring VS Normal		p-value: 1.3953982442022E-9
pHluo-PlxnA1	Movie 1	Position 1	0	0	2	2			pHluo-PlxnA1	10.1124	4.49438	85.3933		pHluo-PlxnA1	9	4	76		Split VS Turned VS Normal		p-value: 7.7328731785919E-9
		Position 2	0	0	4	4			pHluo-PlxnA1 Y1815F	49.3151	10.9589	39.726		pHluo-PlxnA1 Y1815F	36	8	29		Split VS Turned		n.s. (N too small)
		Position 3	0	0	14	14													Turned VS Normal		p-value: 0.0058572402018999
		Position 4	1	0	7	8			%	Exploratory	Non-exploratory			#	Exploratory	Non-exploratory			Split VS Normal		p-value: 2.9795839510311E-9
	Movie 2	Position 1	0	0	0	0			pHluo-PlxnA1	14.6067	85.3933			pHluo-PlxnA1	13	76
		Position 2	0	1	2	3			pHluo-PlxnA1 Y1815F	60.274	39.726			pHluo-PlxnA1 Y1815F	44	29
		Position 3	0	0	0	0
		Position 4	0	0	0	0
	Movie 3	Position 1	0	1	6	7
		Position 2	1	0	5	6
		Position 3	2	1	5	8
		Position 4	3	1	4	8
	Movie 4	Position 1	0	0	2	2
		Position 2	0	0	3	3
		Position 3	0	0	3	3
		Position 4	1	0	4	5
	Movie 5	Position 1	0	0	6	6
		Position 2	0	0	3	3
		Position 3	1	0	6	7
		TOTAL	9	4	76	89
		%	10.1124	4.49438	85.3933	100
pHluo-PlxnM Tyr	Movie 1	Position 1	4	0	1	5
		Position 2	3	2	1	6
		Position 3	5	1	0	6
		Position 4	5	3	1	9
	Movie 2	Position 1	0	0	0	0
		Position 2	0	0	0	0
		Position 3	0	0	0	0
		Position 4	0	0	0	0
	Movie 3	Position 1	2	1	3	6
		Position 2	7	1	10	18
		Position 3	3	0	7	10
		Position 4	3	0	2	5
	Movie 4	Position 1	2	0	2	4
		Position 2	0	0	0	0
		Position 3	2	0	2	4
		Position 4	0	0	0	0
	Movie 5	Position 1	0	0	0	0
		Position 2	0	0	0	0
		Position 3	0	0	0	0
		TOTAL	36	8	29	73
		%	49.3151	10.9589	39.726	100
