# Supplementary material for: SlitC-PlexinA1 mediates iterative inhibition for orderly passage of spinal commissural axons through the floor plate
Source: eLife. 2020 Dec 21;9:e63205. doi: 10.7554/eLife.63205 (PMC7775108; doi:10.7554/eLife.63205)
Supplement: Figure 7—source data 2. [file elife-63205-fig7-data2.xlsx]

## Sheet: Figure 7E-F
PlxnA1 Y1815F	628 1 1					628 1 2						628 3 3										628 4 1																	Pixel size
Time	GC1	GC2	GC3	GC4	GC5	GC1	GC2	GC3	GC4	GC5	GC6	GC1	GC2	GC3	GC4	GC5	GC6	GC7	GC8	GC9	GC10	GC1	GC2	GC3	GC4														x	1.41643	1.41543
0	13	15	15	20	16	24	12	15	13	12	18	15	16	10	15	13	12	14	31	12	15	12	10	11	19														y	1.41443
8	13	15	19	16	14	23	13	14	11	11	17	13	17	8	17	12	9	14	25	13	15	11	16	11	22														z	2
16	13	18	15	13	18	18	15	15	11	14	18	12	19	10	14	15	15	15	14	14	16	10	14	11	21
24	13	17	17	13	15	21	16	19	16	9	25	11	19	8	17	14	12	14	17	12	14	12	13	15	15
32	13	16	15	15	15	17	15	14	14	10	28	14	20	8	14	13	13	15	20	14	15	11	12	14	14
40	12	20	14	13	15	17	15	16	20	10	24	13	19	10	19	12	9	19	24	12	12	9	14	18	16
48	19	16	12	22	16	17	12	22	19	16	21	9	20	14	14	14	10	17	18	10	18	12	13	22	16
56	19	18	9	22	18	18	15	29	22	24	20	9	15	13	15	14	11	21	15	10	17	9	10	23	14
64	15	14	10	20	22	18	15	26	21	22	26	9	13	13	13	15	11	19	16	11	13	9	12	15	16
72	18	14	10	16	23	16	13	26	21	21	27	11	17	14	13	16	10	16	22	10	12	8	9	16	16
80	17	18	11	19	20	12	15	24	19	19	26	19	15	12	11	15	9	14	37	10	15	8	8	11	15
88	21	19	16	24	19	13	15	21	19	23	30	17	13	12	10	13	9	13	22	11	12	9	11	11	15
96	24	21	14	25	18	12	13	20	21	22	28	20	13	15	12	14	12	14	22	10	12	9	11	16	17
104	15	14	12	48	24	12	14	21	26	22	31	23	11	14	10	12	11	15	20	12	16	6	12	13	14
Mean	16.0714	16.7857	13.5	20.4286	18.0714	17	14.1429	20.1429	18.0714	16.7857	24.2143	13.9286	16.2143	11.5	13.8571	13.7143	10.9286	15.7143	21.6429	11.5	14.4286	9.64286	11.7857	14.7857	16.4286	15.6514	0.702768
	1.44311	1.50725	1.21221	1.83436	1.6227	1.52649	1.26994	1.8087	1.6227	1.50725	2.17429	1.2507	1.45594	1.03263	1.24428	1.23146	0.981316	1.41104	1.94339	1.03263	1.29559	0.865867	1.05828	1.32766	1.47518	1.4054	0.0631041
PlxnA1	188 4 4					188 1 2				188 3 3								188 5 1
Time	GC1	GC2	GC3	GC4	GC5	GC1	GC2	GC3	GC4	GC1	GC2	GC3	GC4	GC5	GC6	GC7	GC8	GC1	GC2	GC3	GC4	GC5	GC6								t-test
0	13	13	5	8	14	7	11	8	11	29	10	12	9	10	21	13	9	19	15	7	15	10	10					Mean	SE		p-value : 2.2221542835099E-5
8	8	10	7	9	14	7	10	9	10	26	8	10	7	16	10	11	10	18	9	7	9	9	9				PlxnA1	1	0.0581999
16	11	8	7	9	21	8	10	8	10	23	10	9	7	14	10	12	11	18	8	11	12	14	11				PlxnM Tyr	1.4054	0.0631041
24	9	11	6	9	28	10	13	7	12	25	12	9	6	9	13	13	10	17	11	12	10	13	17
32	9	12	6	8	23	8	7	7	11	19	9	9	8	11	14	12	10	17	10	13	11	13	15
40	9	12	6	10	15	10	11	8	10	11	8	6	8	15	23	9	7	15	12	13	6	11	14
48	11	12	6	10	17	6	10	7	8	18	11	6	6	12	30	9	9	14	12	15	8	14	15
56	16	12	7	13	14	8	9	8	9	14	9	6	6	13	30	11	9	15	9	17	9	11	14
64	11	13	9	9	13	9	9	8	10	19	6	6	8	12	24	11	9	17	12	16	12	13	12
72	13	12	11	8	13	8	10	6	8	12	7	7	7	13	22	11	10	19	11	14	11	11	12
80	13	13	9	6	14	8	8	8	11	15	8	11	9	7	16	13	9	15	11	16	11	9	10
88	13	13	8	10	17	8	8	5	7	10	7	11	10	11	14	12	8	16	12	13	9	11	8
96	10	12	7	10	10	6	10	7	8	11	8	10	8	8	9	13	11	13	14	9	7	12	10
104	11	14	8	9	11	8	9	6	6	11	11	10	8	8	11	14	10	16	12	11	9	13	10
Mean	11.2143	11.9286	7.28571	9.14286	16	7.92857	9.64286	7.28571	9.35714	17.3571	8.85714	8.71429	7.64286	11.3571	17.6429	11.7143	9.42857	16.3571	11.2857	12.4286	9.92857	11.7143	11.9286	11.1366	0.648151
	1.00697	1.07111	0.654211	0.82097	1.4367	0.711935	0.865867	0.654211	0.840212	1.55856	0.795315	0.782487	0.68628	1.0198	1.58422	1.05187	0.846626	1.46877	1.01339	1.11601	0.891523	1.05187	1.07111	1	0.0581999
	Time	0	8	16	24	32	40	48	56	64	72	80	88	96	104	Mean
	Plxn M Tyr 12	16.9851	15.5697	14.1543	16.9851	15.5697	12.7389	16.9851	12.7389	12.7389	11.3234	11.3234	12.7389	12.7389	8.49257	13.6488	1.22557
	PlxnM Tyr 9	16.9851	12.7389	21.2314	16.9851	18.4006	12.7389	14.1543	15.5697	15.5697	14.1543	12.7389	12.7389	16.9851	15.5697	15.4686	1.38898
	Plxn M Tyr 8	14.1543	11.3234	14.1543	11.3234	11.3234	14.1543	19.816	18.4006	18.4006	19.816	16.9851	16.9851	21.2314	19.816	16.2774	1.46161
	Plxn M Tyr 11	16.9851	18.4006	19.816	16.9851	19.816	16.9851	14.1543	14.1543	15.5697	14.1543	14.1543	15.5697	14.1543	16.9851	16.2774	1.46161
	PlxnM Tyr 12	14.1543	22.6469	19.816	18.4006	16.9851	19.816	18.4006	14.1543	16.9851	12.7389	11.3234	15.5697	15.5697	16.9851	16.6818	1.49792
	PlxnM Tyr 2	21.2314	26.8932	21.2314	24.0623	21.2314	19.816	16.9851	12.7389	14.1543	14.1543	15.5697	22.6469	19.816	16.9851	19.1083	1.7158
	Plxn M Tyr 9	18.4006	16.9851	21.2314	19.816	18.4006	16.9851	19.816	19.816	21.2314	22.6469	21.2314	18.4006	19.816	16.9851	19.4116	1.74304
	PlxnM Tyr 8	21.2314	24.0623	19.816	24.0623	19.816	26.8932	19.816	21.2314	18.4006	18.4006	15.5697	14.1543	16.9851	14.1543	19.6138	1.76119
	Plxn M Tyr 7	21.2314	18.4006	16.9851	15.5697	19.816	18.4006	12.7389	12.7389	12.7389	15.5697	26.8932	24.0623	28.3086	32.5549	19.7149	1.77027
	PlxnM Tyr 4	16.9851	18.4006	21.2314	22.6469	21.2314	21.2314	16.9851	21.2314	21.2314	18.4006	21.2314	21.2314	18.4006	19.816	20.0182	1.79751
	PlxnM Tyr 11	21.2314	21.2314	22.6469	19.816	21.2314	16.9851	25.4777	24.0623	18.4006	16.9851	21.2314	16.9851	16.9851	22.6469	20.4226	1.83382
	Plxn M Tyr 13	15.5697	15.5697	15.5697	21.2314	19.816	25.4777	31.1394	32.5549	21.2314	22.6469	15.5697	15.5697	22.6469	18.4006	20.9281	1.87921
	Plxn M Tyr 10	19.816	19.816	21.2314	19.816	21.2314	26.8932	24.0623	29.724	26.8932	22.6469	19.816	18.4006	19.816	21.2314	22.2425	1.99723
	PlxnM Tyr 1	18.4006	18.4006	18.4006	18.4006	18.4006	16.9851	26.8932	26.8932	21.2314	25.4777	24.0623	29.724	33.9703	21.2314	22.748	2.04262
	PlxnM Tyr 7	22.6469	24.0623	26.8932	26.8932	28.3086	26.8932	28.3086	21.2314	18.4006	24.0623	21.2314	18.4006	18.4006	15.5697	22.9502	2.06078
	PlxnM Tyr 13	26.8932	31.1394	29.724	21.2314	19.816	22.6469	22.6469	19.816	22.6469	22.6469	21.2314	21.2314	24.0623	19.816	23.2535	2.08801
	Plxn M Tyr 2	21.2314	21.2314	25.4777	24.0623	22.6469	28.3086	22.6469	25.4777	19.816	19.816	25.4777	26.8932	29.724	19.816	23.759	2.13341
	Plxn M Tyr 6	16.9851	15.5697	19.816	12.7389	14.1543	14.1543	22.6469	33.9703	31.1394	29.724	26.8932	32.5549	31.1394	31.1394	23.759	2.13341
	Plxn M Tyr 4	33.9703	32.5549	25.4777	29.724	24.0623	24.0623	24.0623	25.4777	25.4777	22.6469	16.9851	18.4006	16.9851	16.9851	24.0623	2.16064
	PlxnM Tyr 3	22.6469	19.816	25.4777	21.2314	21.2314	21.2314	22.6469	25.4777	31.1394	32.5549	28.3086	26.8932	25.4777	33.9703	25.5788	2.29682
	PlxnM Tyr 5	18.4006	15.5697	15.5697	22.6469	19.816	28.3086	26.8932	31.1394	29.724	29.724	26.8932	26.8932	29.724	36.8012	25.5788	2.29682
	Plxn M Tyr 5	21.2314	19.816	21.2314	26.8932	19.816	22.6469	31.1394	41.0474	36.8012	36.8012	33.9703	29.724	28.3086	29.724	28.5108	2.56009
	Plxn M Tyr 3	28.3086	22.6469	18.4006	18.4006	21.2314	18.4006	31.1394	31.1394	28.3086	22.6469	26.8932	33.9703	35.3857	67.9406	28.9152	2.5964
	PlxnM Tyr 10	43.8783	35.3857	19.816	24.0623	28.3086	33.9703	25.4777	21.2314	22.6469	31.1394	52.3709	31.1394	31.1394	28.3086	30.6339	2.75073
	PlxnM Tyr 6	25.4777	24.0623	25.4777	35.3857	39.632	33.9703	29.724	28.3086	36.8012	38.2166	36.8012	42.4629	39.632	43.8783	34.2736	3.07755
	PlxnA1 3	7.07714	9.908	9.908	8.49257	8.49257	8.49257	8.49257	9.908	12.7389	15.5697	12.7389	11.3234	9.908	11.3234	10.3124	0.925989
	PlxnA1 8	11.3234	12.7389	11.3234	9.908	9.908	11.3234	9.908	11.3234	11.3234	8.49257	11.3234	7.07714	9.908	8.49257	10.3124	0.925989
	PlxnA1 13	12.7389	9.908	9.908	8.49257	11.3234	11.3234	8.49257	8.49257	11.3234	9.908	12.7389	14.1543	11.3234	11.3234	10.8179	0.971381
	PlxnA1 6	9.908	9.908	11.3234	14.1543	11.3234	14.1543	8.49257	11.3234	12.7389	11.3234	11.3234	11.3234	8.49257	11.3234	11.2223	1.00769
	PlxnA1 12	16.9851	14.1543	12.7389	12.7389	12.7389	8.49257	8.49257	8.49257	8.49257	9.908	15.5697	15.5697	14.1543	14.1543	12.3345	1.10756
	PlxnA1 11	14.1543	11.3234	14.1543	16.9851	12.7389	11.3234	15.5697	12.7389	8.49257	9.908	11.3234	9.908	11.3234	15.5697	12.5367	1.12571
	PlxnA1 4	11.3234	12.7389	12.7389	12.7389	11.3234	14.1543	14.1543	18.4006	12.7389	11.3234	8.49257	14.1543	14.1543	12.7389	12.9411	1.16203
	PlxnA1 9	15.5697	14.1543	14.1543	16.9851	15.5697	14.1543	11.3234	12.7389	14.1543	11.3234	15.5697	9.908	11.3234	8.49257	13.2444	1.18926
	PlxnA1 17	12.7389	14.1543	15.5697	14.1543	14.1543	9.908	12.7389	12.7389	12.7389	14.1543	12.7389	11.3234	15.5697	14.1543	13.3455	1.19834
	PlxnA1 7	15.5697	14.1543	14.1543	18.4006	9.908	15.5697	14.1543	12.7389	12.7389	14.1543	11.3234	11.3234	14.1543	12.7389	13.6488	1.22557
	PlxnA1 21	21.2314	12.7389	16.9851	14.1543	15.5697	8.49257	11.3234	12.7389	16.9851	15.5697	15.5697	12.7389	9.908	12.7389	14.0532	1.26189
	PlxnA1 1	18.4006	11.3234	15.5697	12.7389	12.7389	12.7389	15.5697	22.6469	15.5697	18.4006	18.4006	18.4006	14.1543	15.5697	15.873	1.4253
	PlxnA1 19	21.2314	12.7389	11.3234	15.5697	14.1543	16.9851	16.9851	12.7389	16.9851	15.5697	15.5697	16.9851	19.816	16.9851	15.9741	1.43438
	PlxnA1 14	14.1543	22.6469	19.816	12.7389	15.5697	21.2314	16.9851	18.4006	16.9851	18.4006	9.908	15.5697	11.3234	11.3234	16.0752	1.44345
	PlxnA1 16	18.4006	15.5697	16.9851	18.4006	16.9851	12.7389	12.7389	15.5697	15.5697	15.5697	18.4006	16.9851	18.4006	19.816	16.5807	1.48885
	PlxnA1 22	14.1543	12.7389	19.816	18.4006	18.4006	15.5697	19.816	15.5697	18.4006	15.5697	12.7389	15.5697	16.9851	18.4006	16.5807	1.48885
	PlxnA1 2	18.4006	14.1543	11.3234	15.5697	16.9851	16.9851	16.9851	16.9851	18.4006	16.9851	18.4006	18.4006	16.9851	19.816	16.884	1.51608
	PlxnA1 23	14.1543	12.7389	15.5697	24.0623	21.2314	19.816	21.2314	19.816	16.9851	16.9851	14.1543	11.3234	14.1543	14.1543	16.884	1.51608
	PlxnA1 20	9.908	9.908	15.5697	16.9851	18.4006	18.4006	21.2314	24.0623	22.6469	19.816	22.6469	18.4006	12.7389	15.5697	17.5918	1.57963
	PlxnA1 5	19.816	19.816	29.724	39.632	32.5549	21.2314	24.0623	19.816	18.4006	18.4006	19.816	24.0623	14.1543	15.5697	22.6469	2.03354
	PlxnA1 18	26.8932	25.4777	25.4777	24.0623	24.0623	21.2314	19.816	21.2314	24.0623	26.8932	21.2314	22.6469	18.4006	22.6469	23.1524	2.07894
	PlxnA1 10	41.0474	36.8012	32.5549	35.3857	26.8932	15.5697	25.4777	19.816	26.8932	16.9851	21.2314	14.1543	15.5697	15.5697	24.5678	2.20603
	PlxnA1 15	29.724	14.1543	14.1543	18.4006	19.816	32.5549	42.4629	42.4629	33.9703	31.1394	22.6469	19.816	12.7389	15.5697	24.9722	2.24235
	PlxnM Tyr = PlxnA1 Y1815F
